# Supplementary material for: Upregulation of the Mevalonate Pathway through EWSR1-FLI1/EGR2 Regulatory Axis Confers Ewing Cells Exquisite Sensitivity to Statins
Source: MDPI journal article supplement (doi:10.3390/cancers14092327), 2022-05-08

figure 1A

Chemidoc acquisition

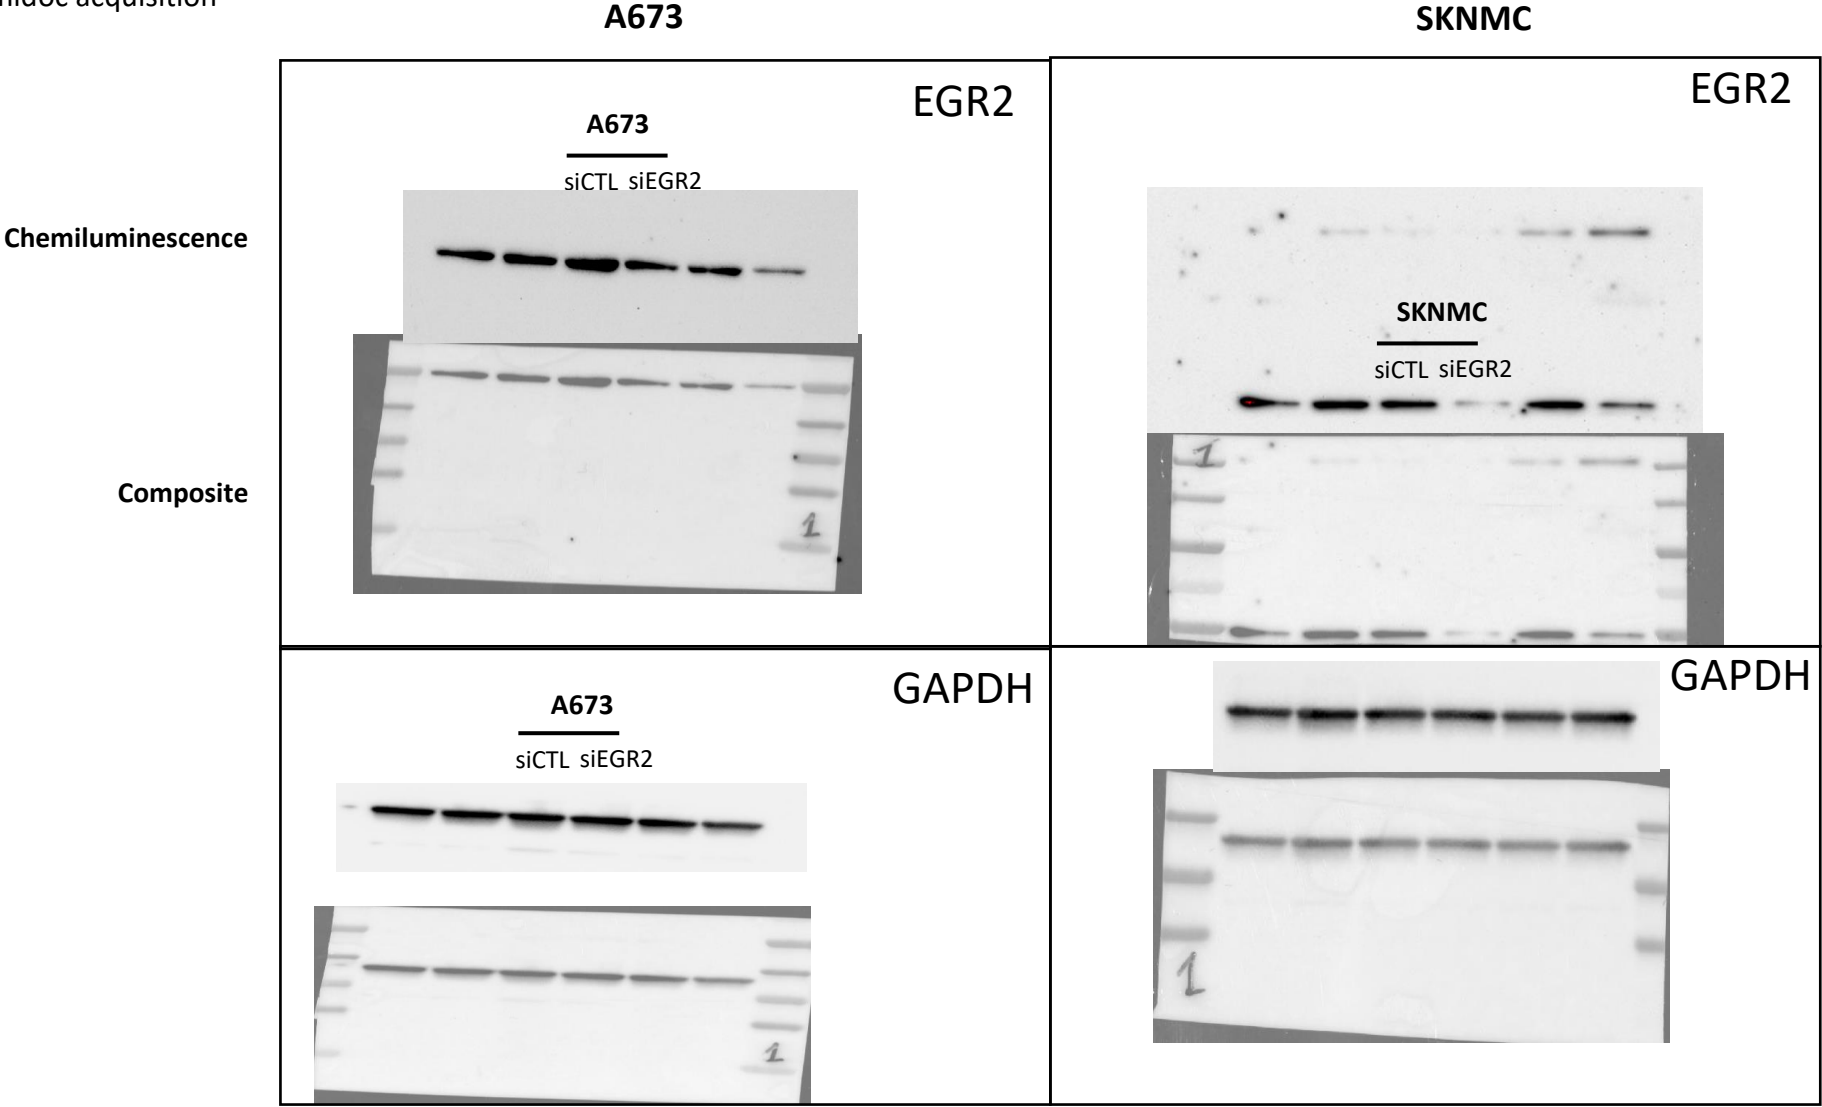

A673/TR/EF1 figure 2A

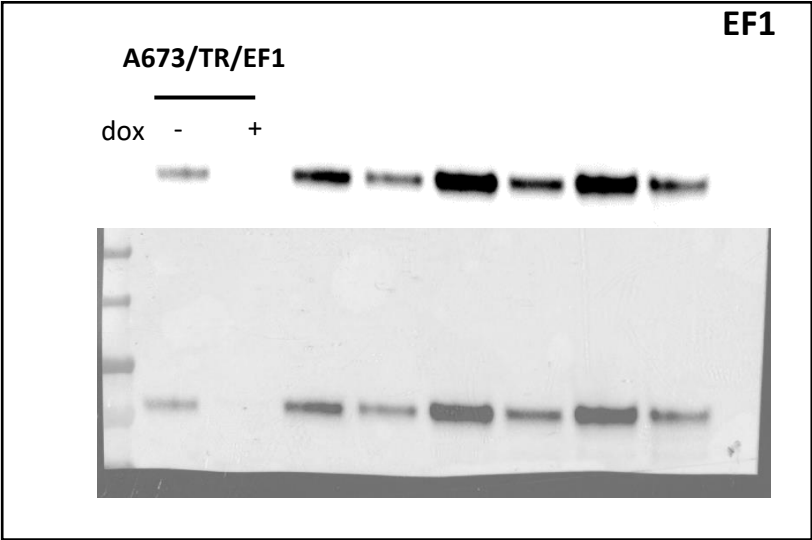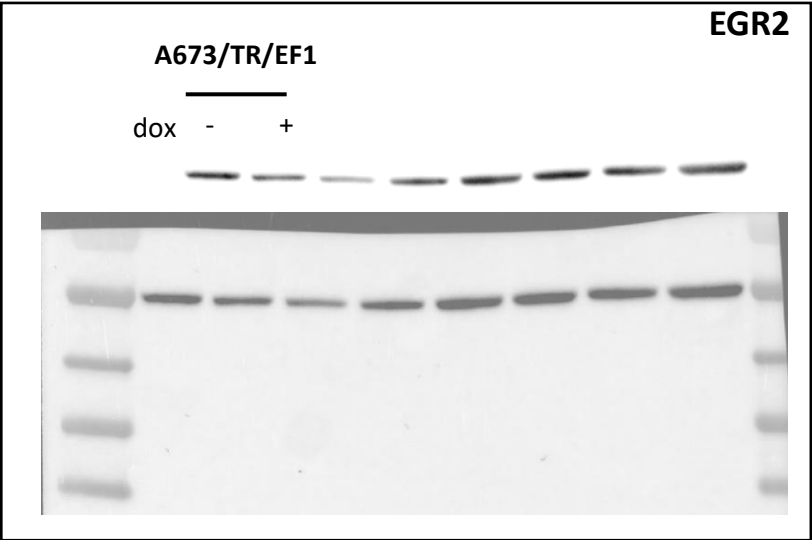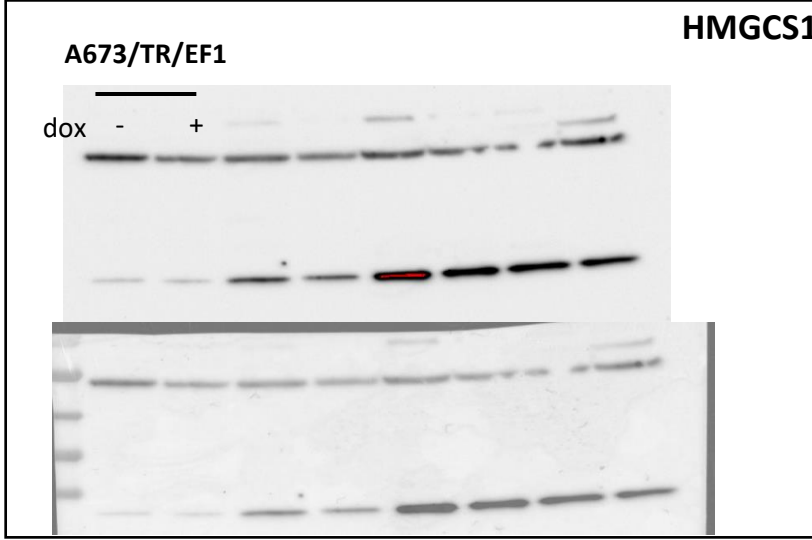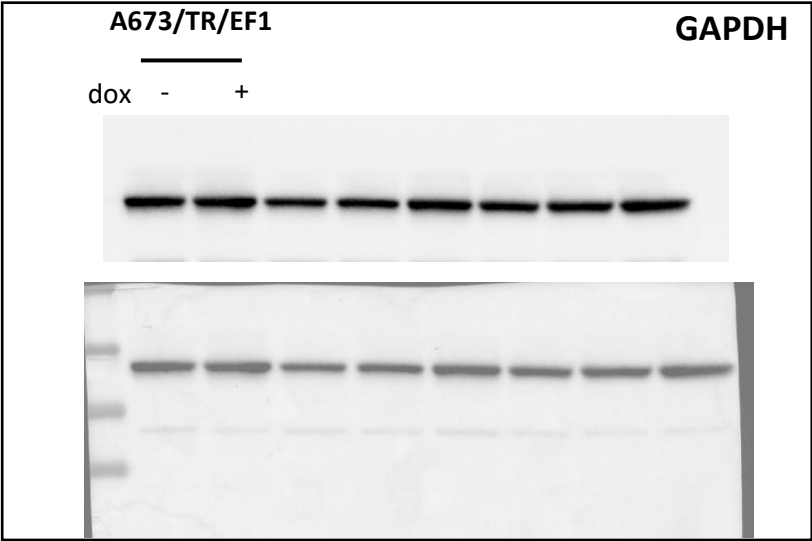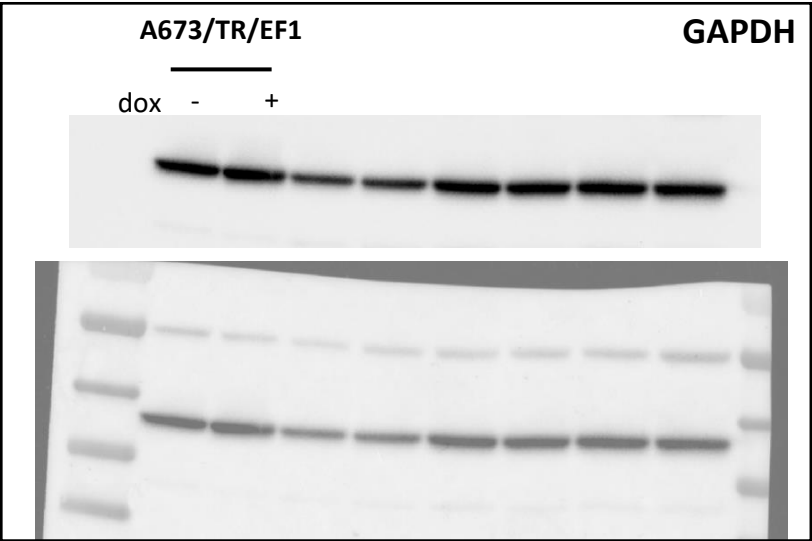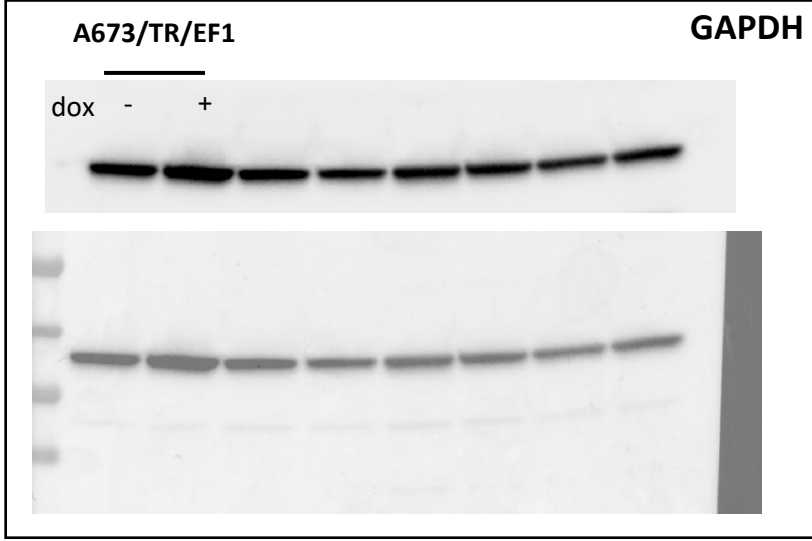

A673/TR/EF1 figure 2A

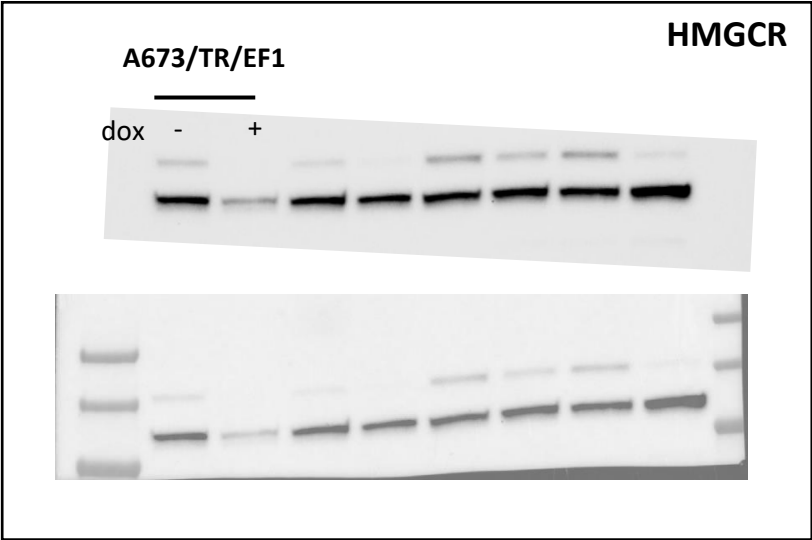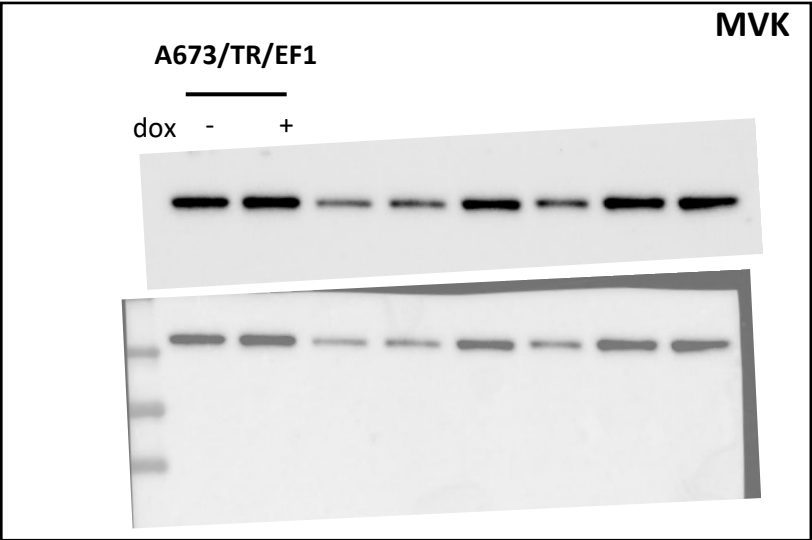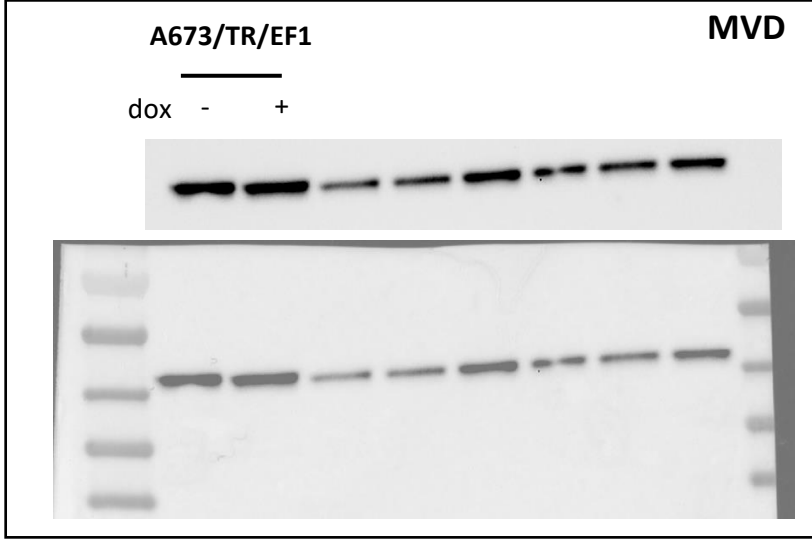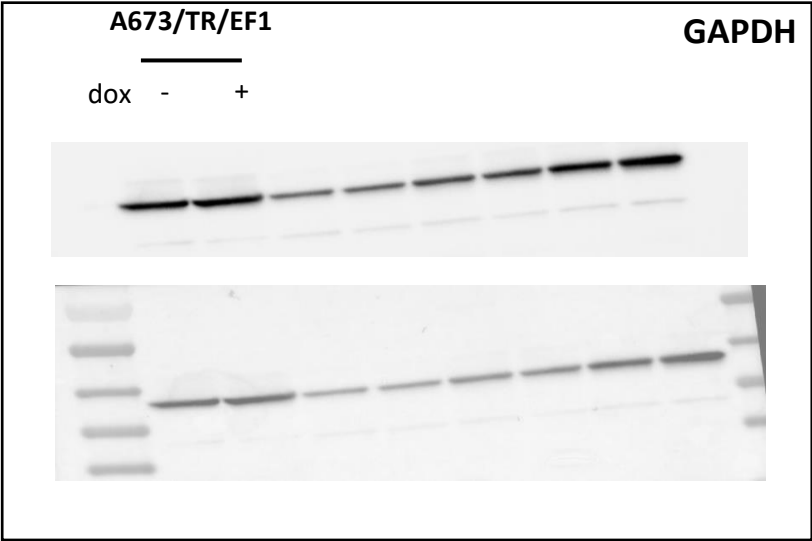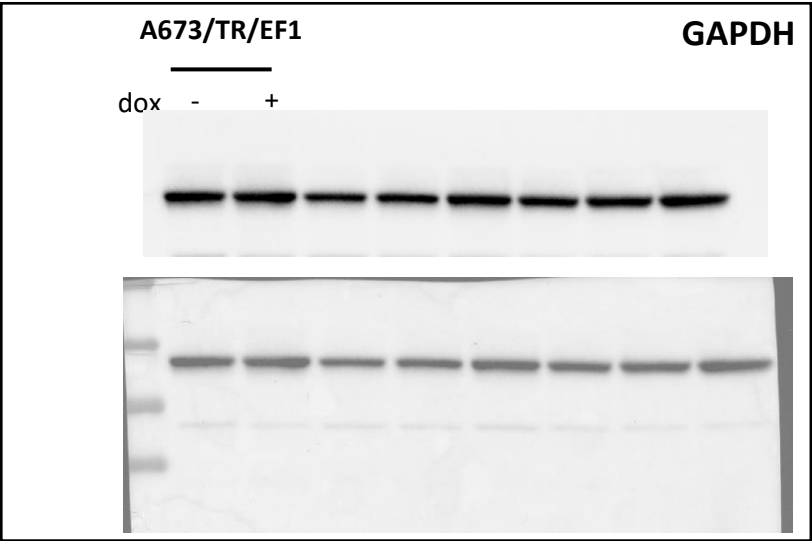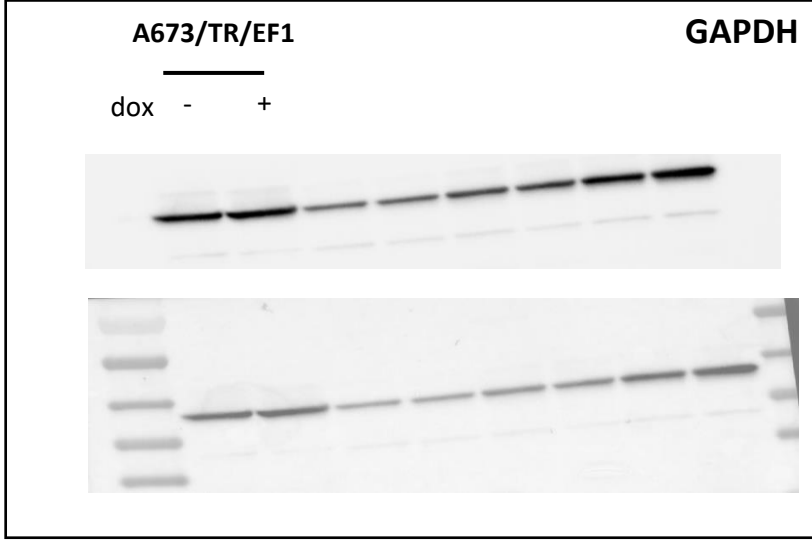

A673\_siEF1 figure 2A

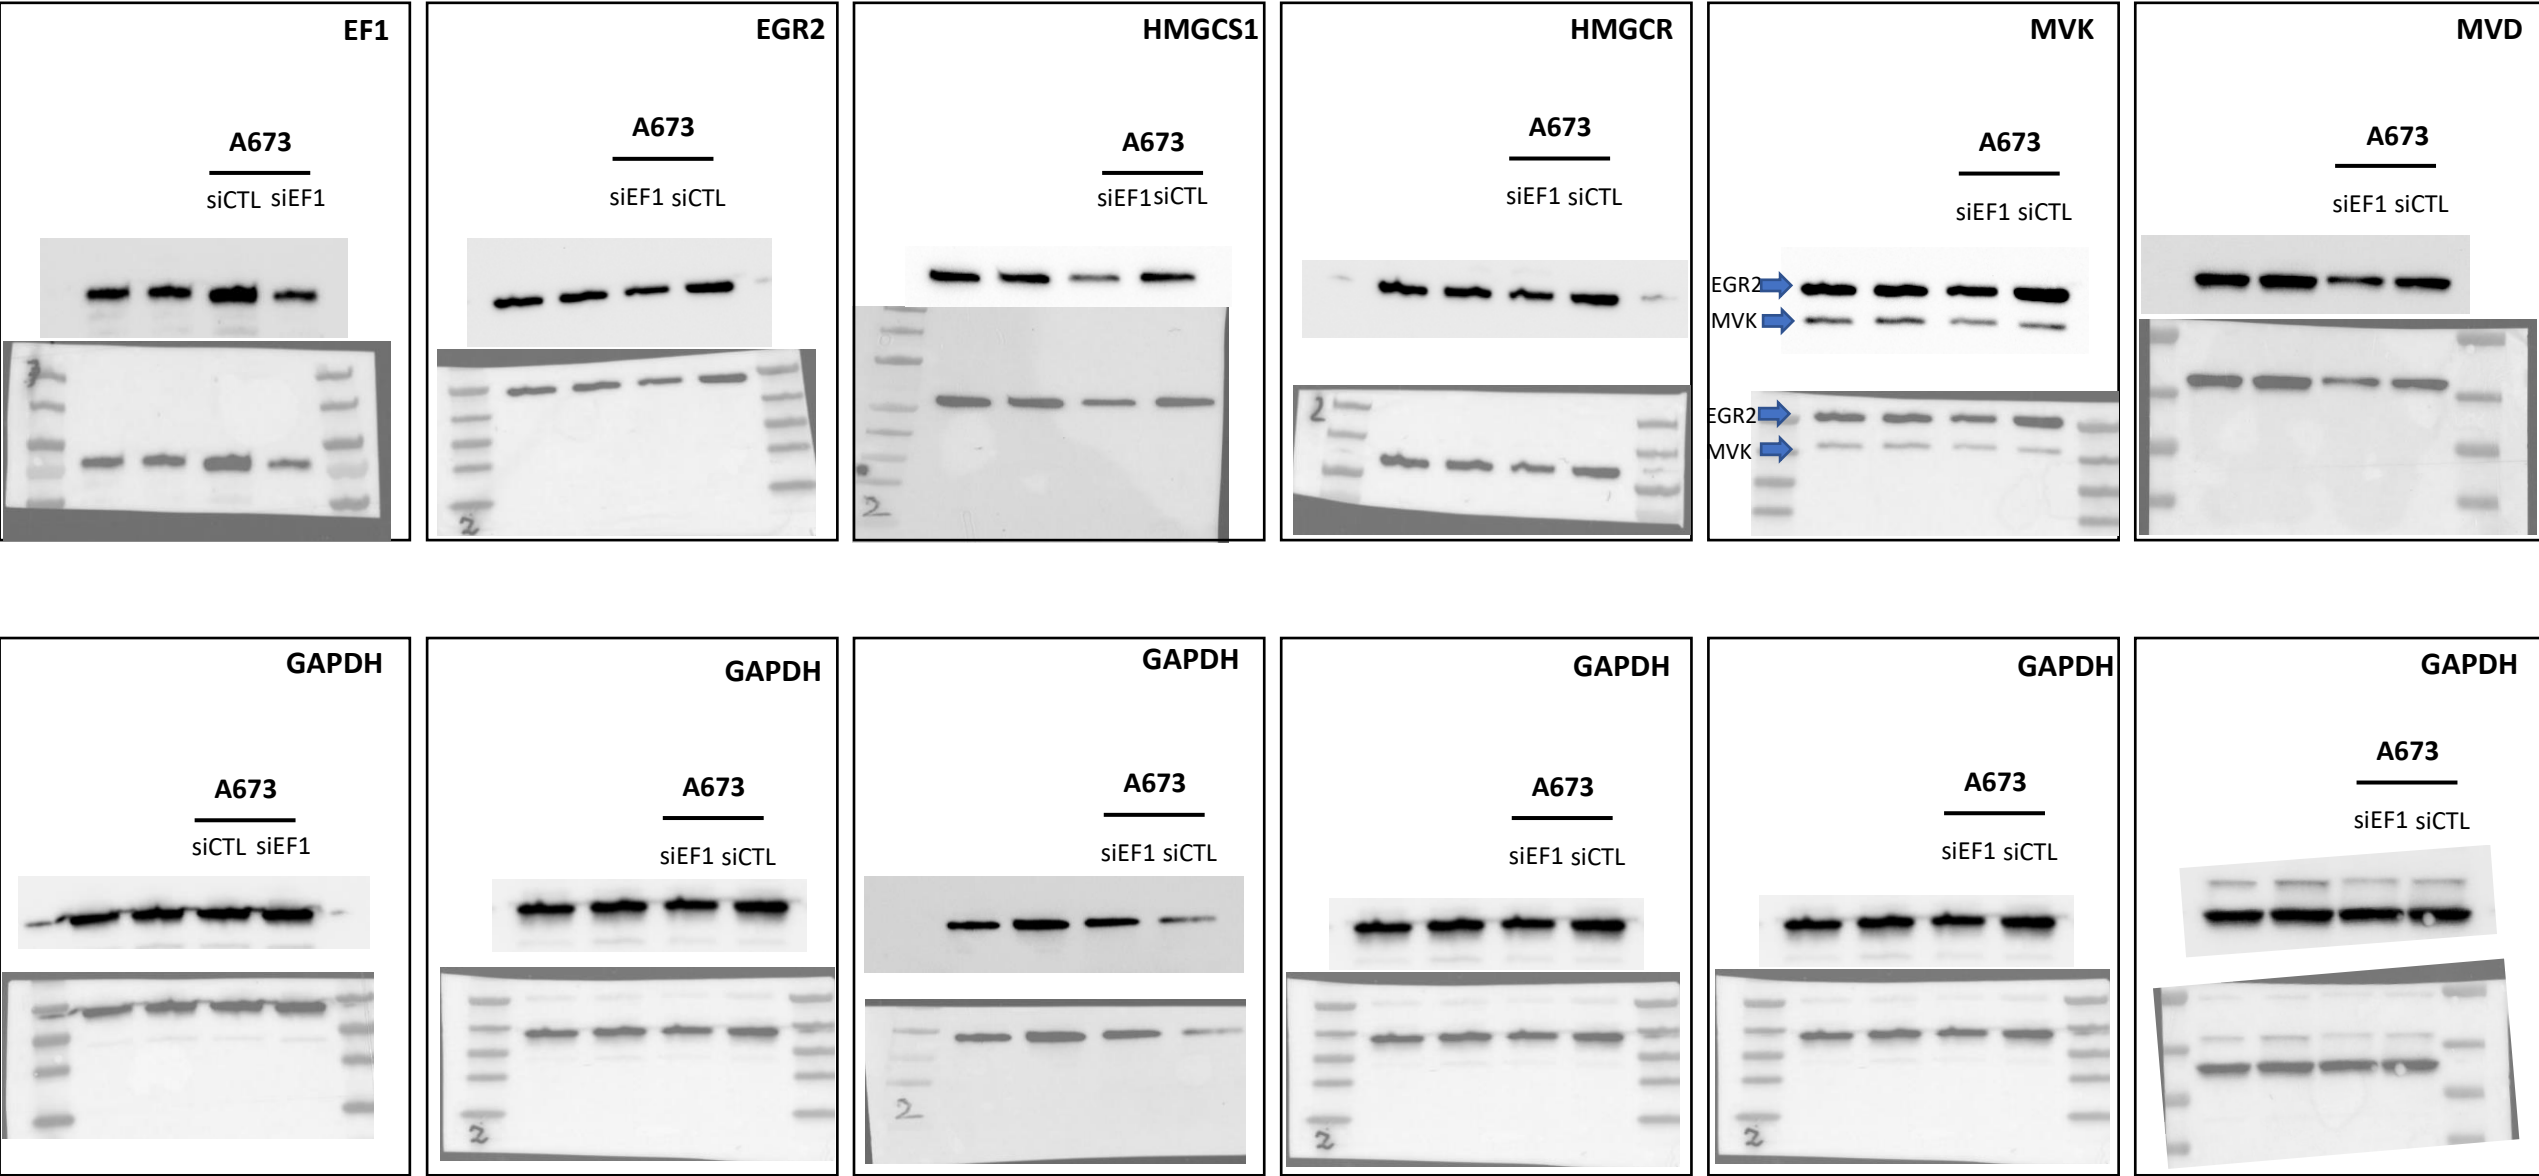

SKNMC\_siEF1 figure 2A

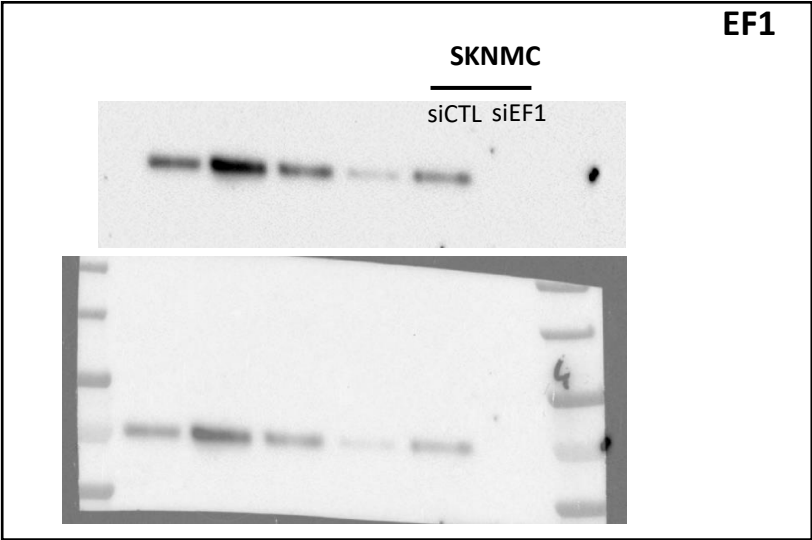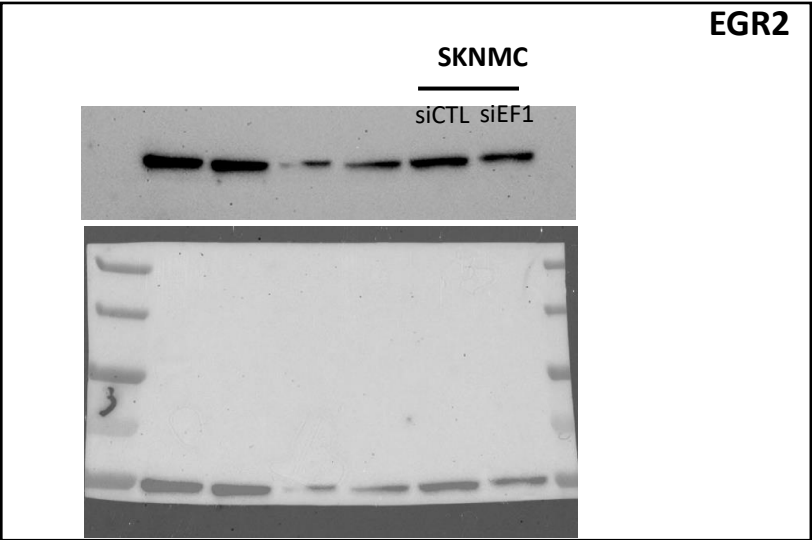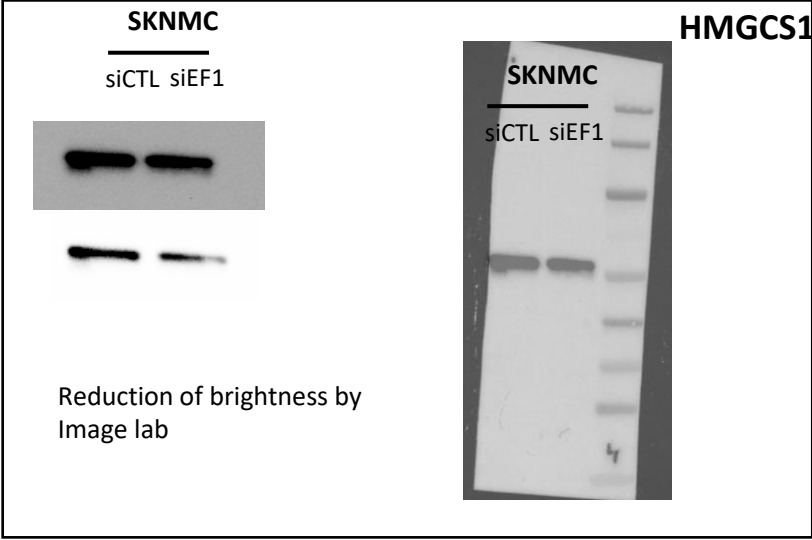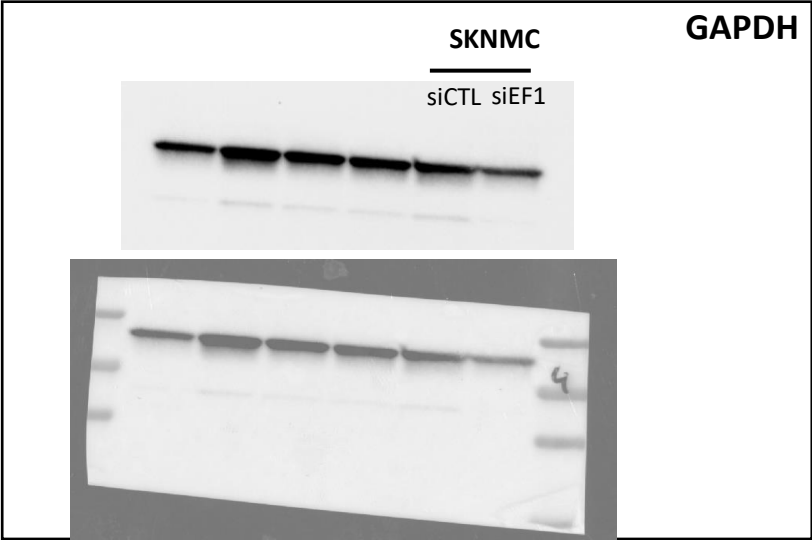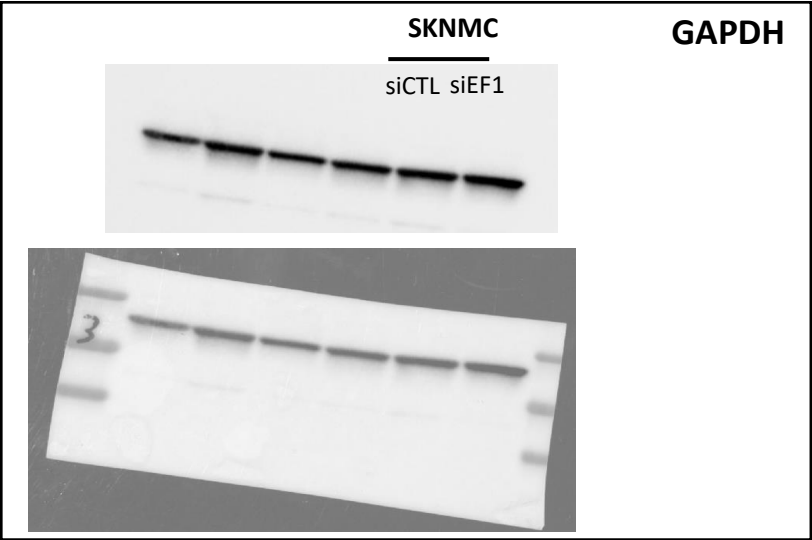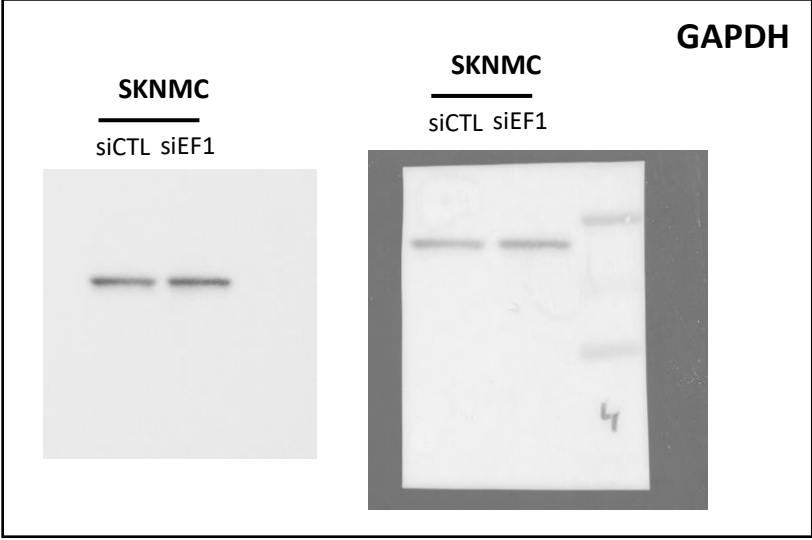

SKNMC\_siEF1 figure 2A

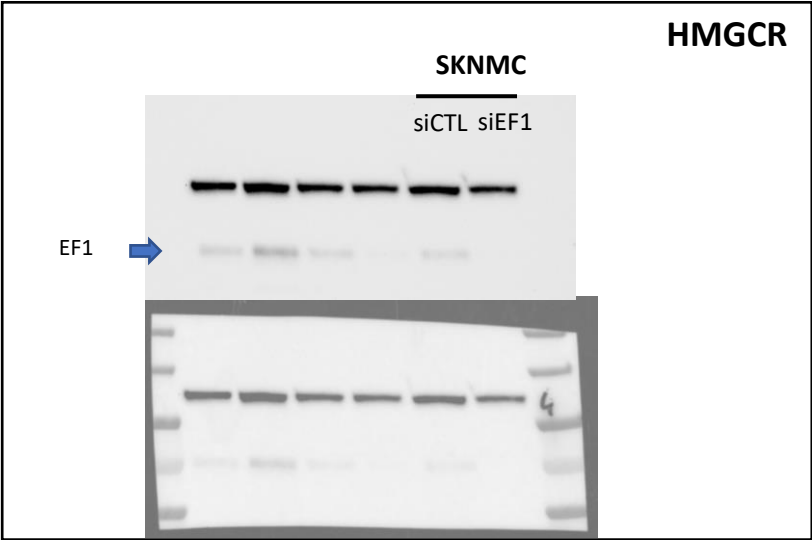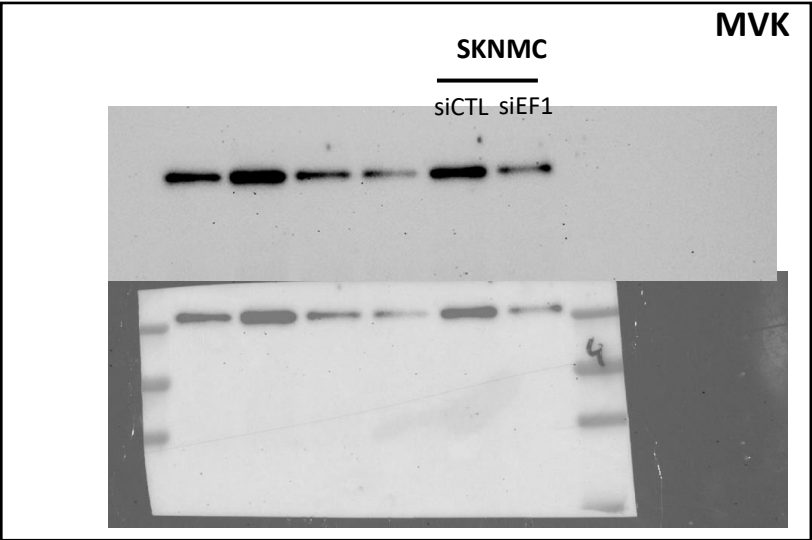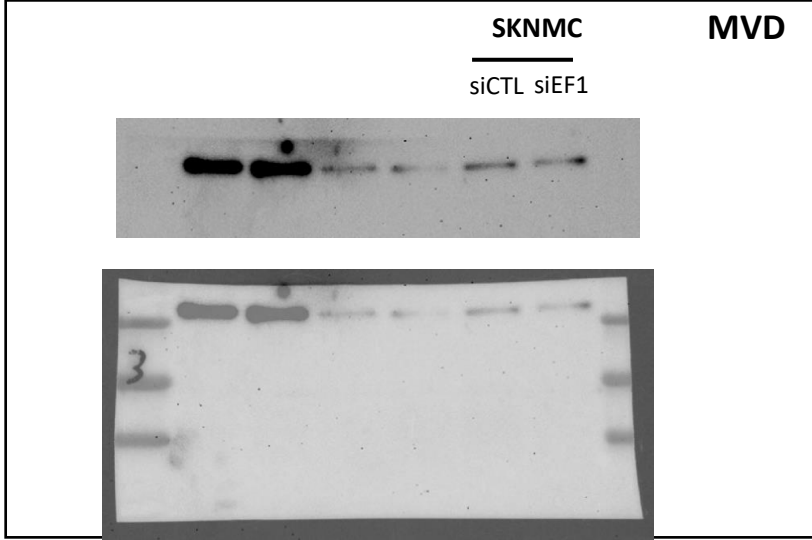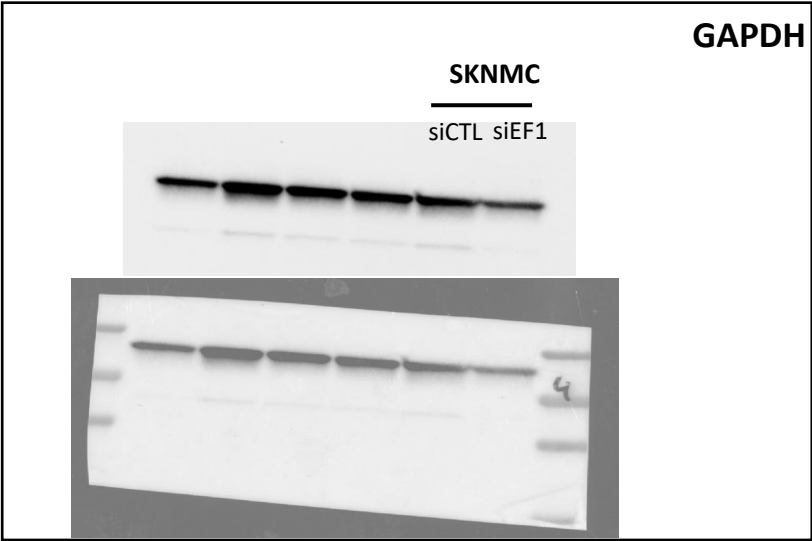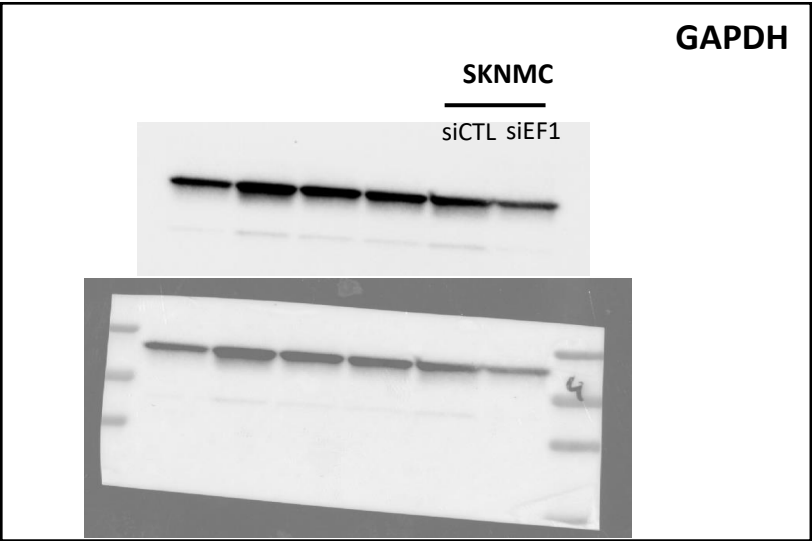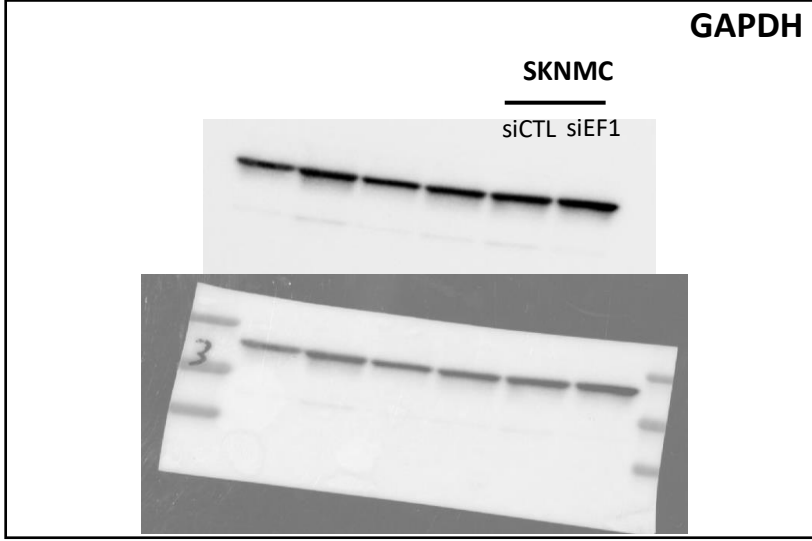

TC71\_siEF1 figure 2A

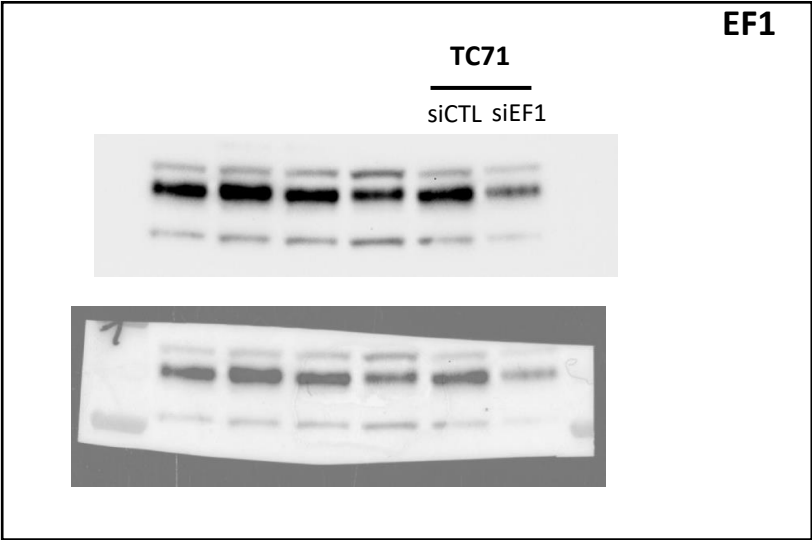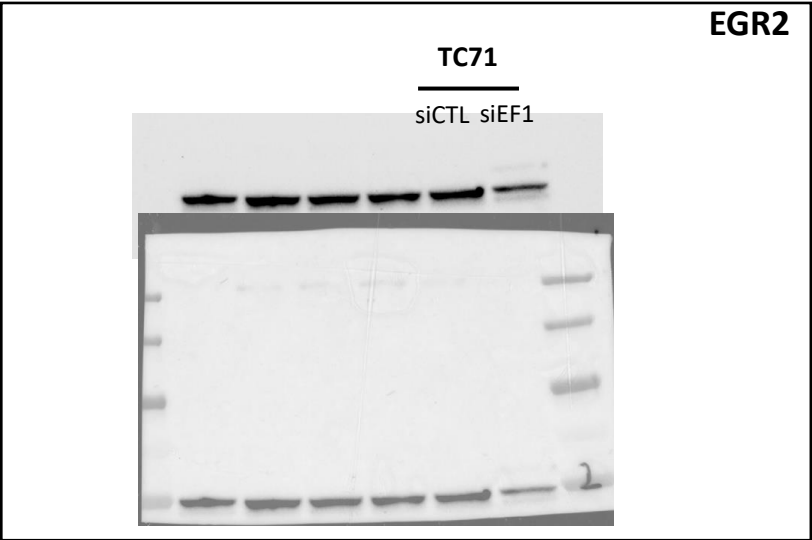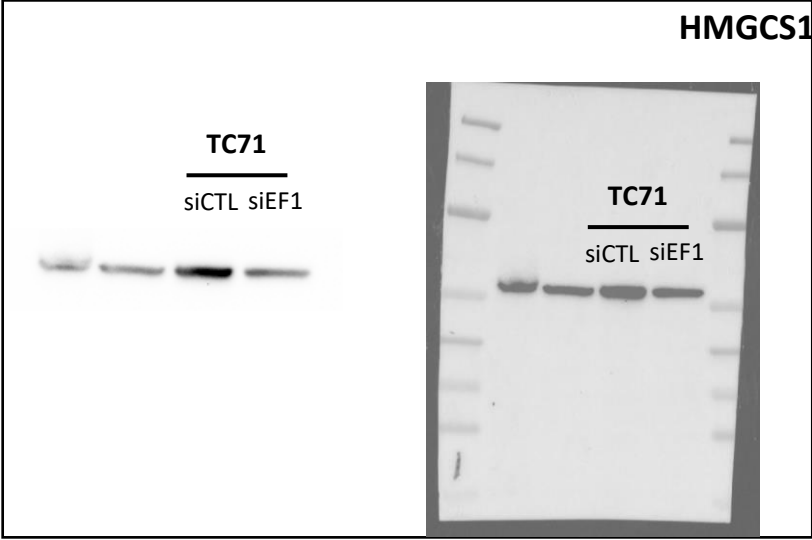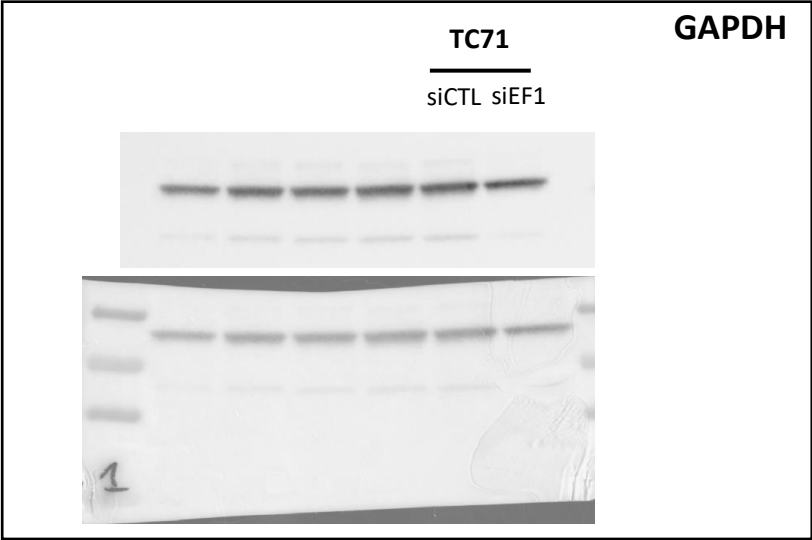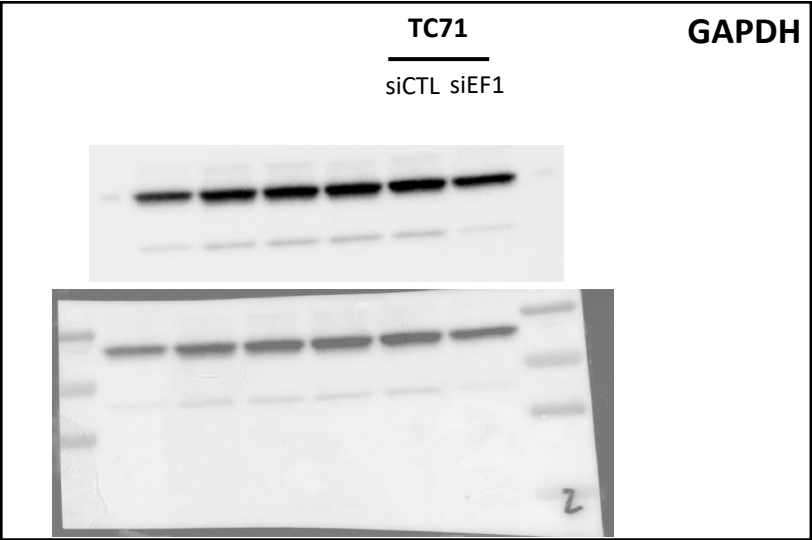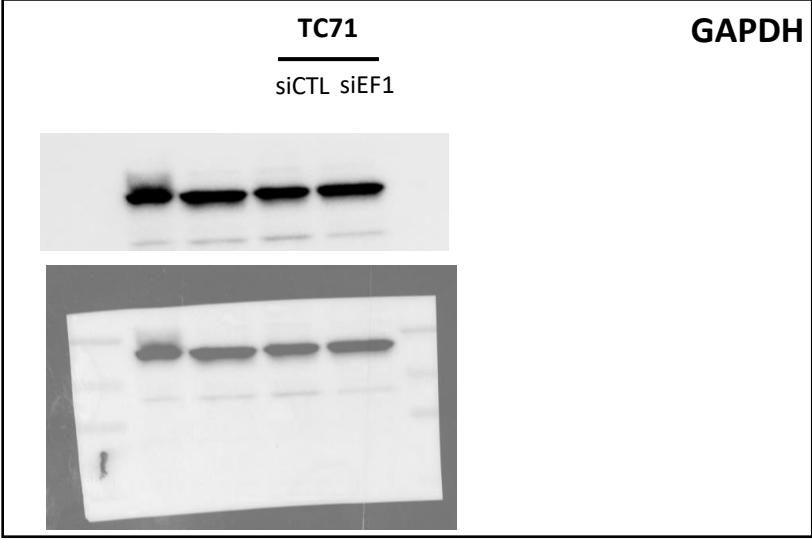

TC71\_siEF1 figure 2A

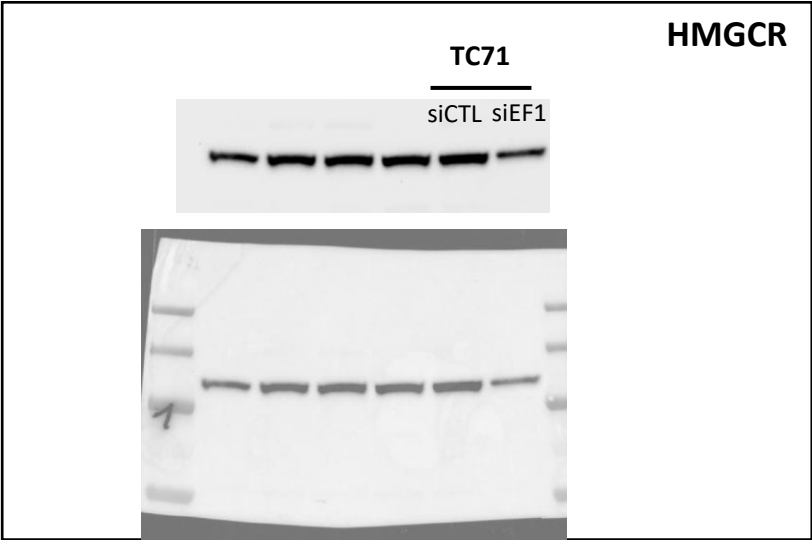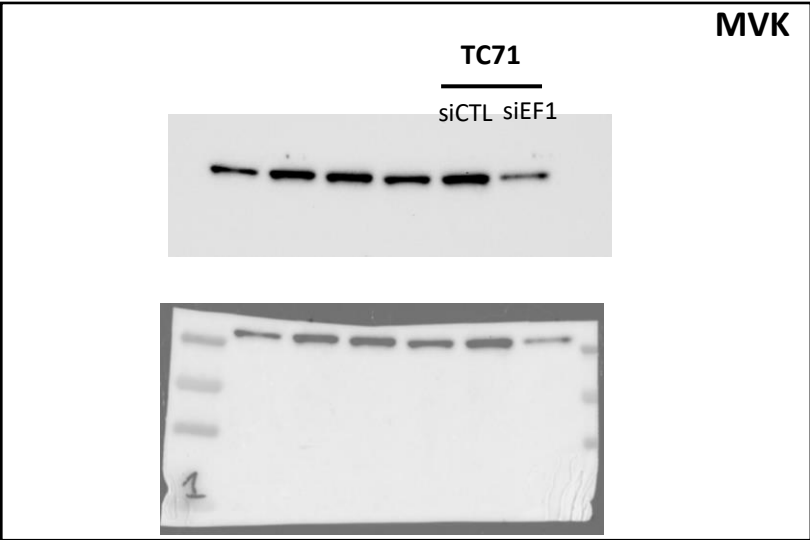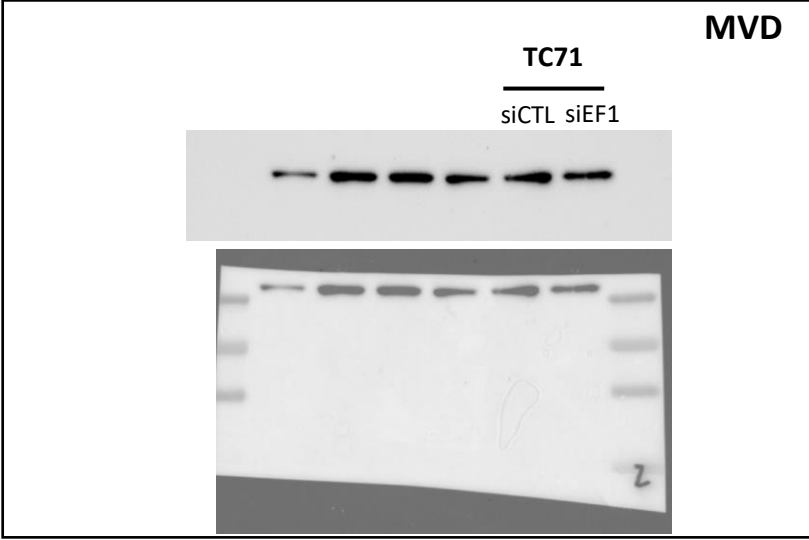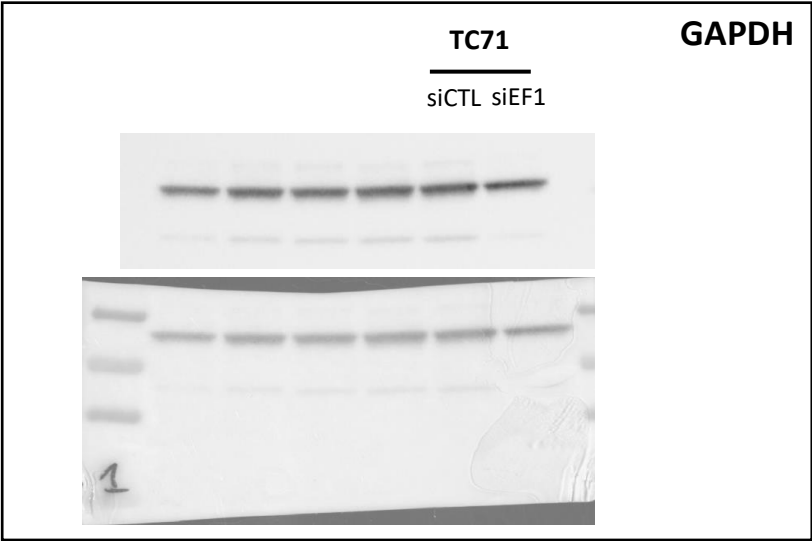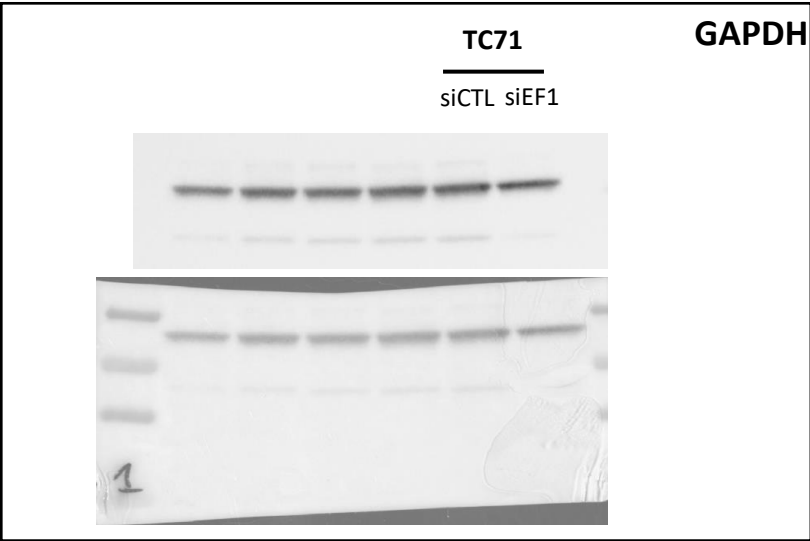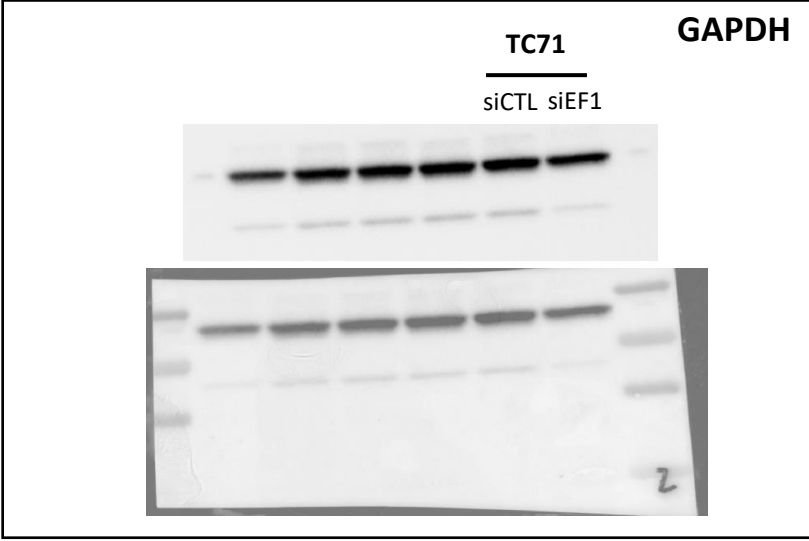



POE\_siEF1 figure 2A

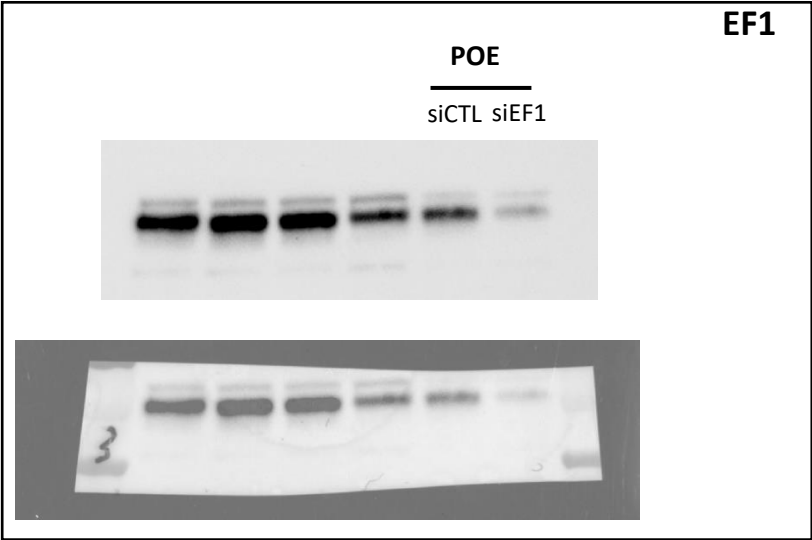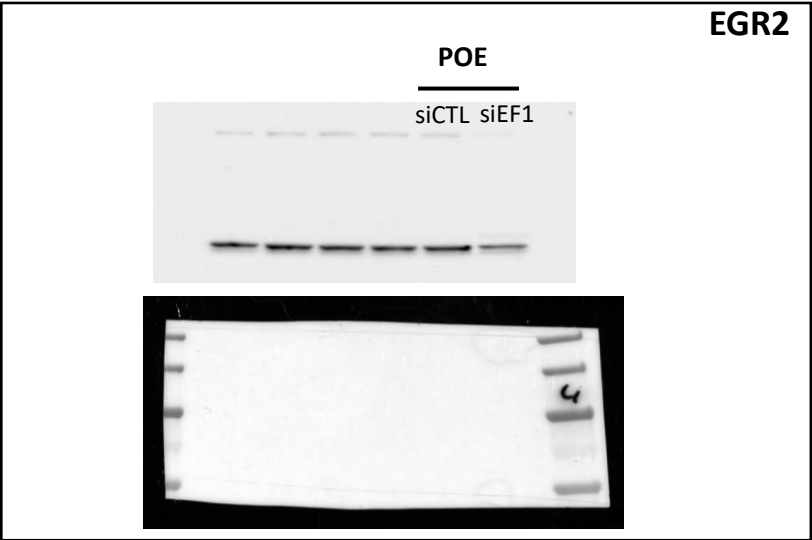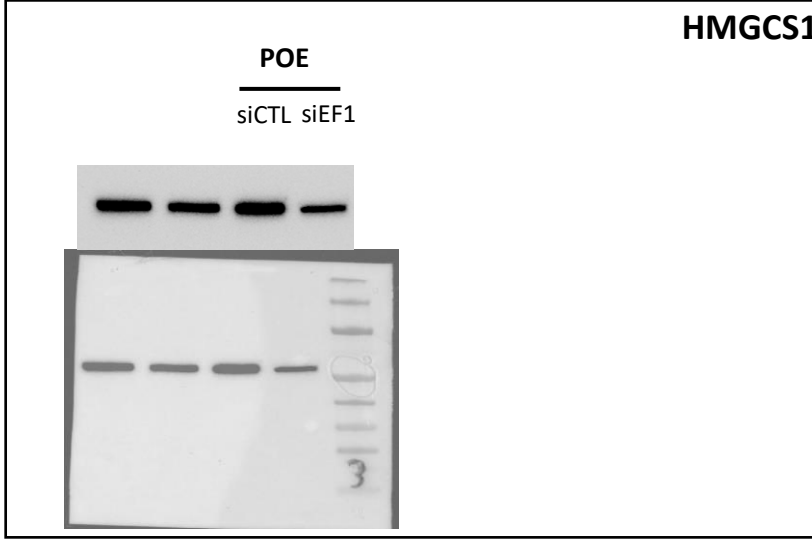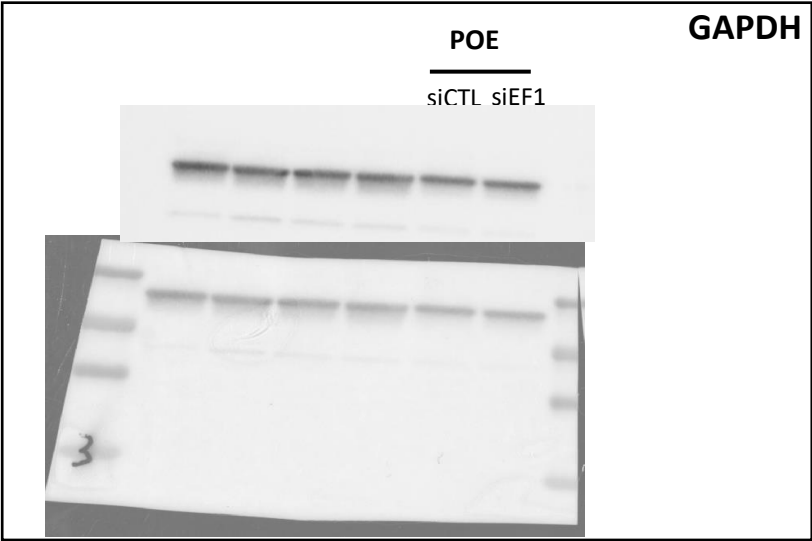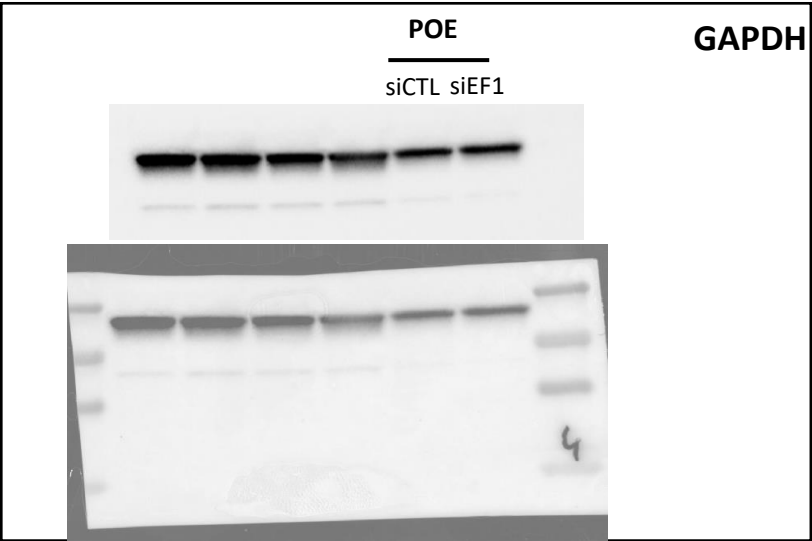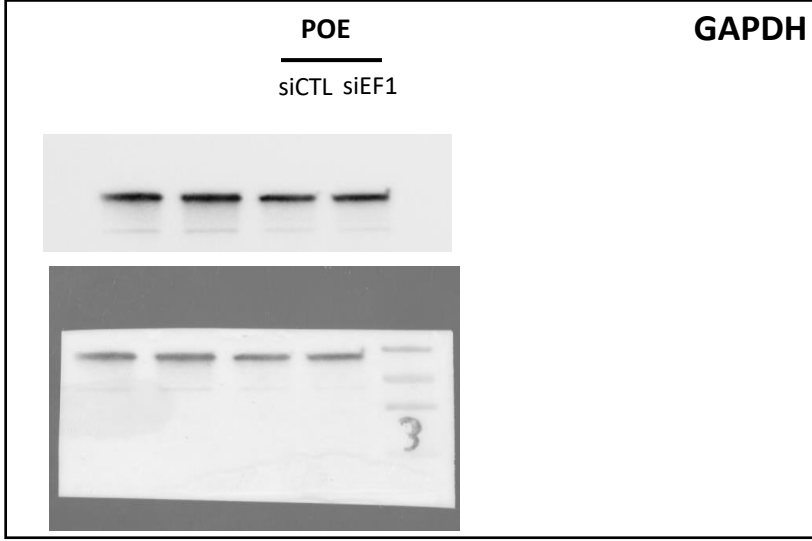

POE\_siEF1 figure 2A

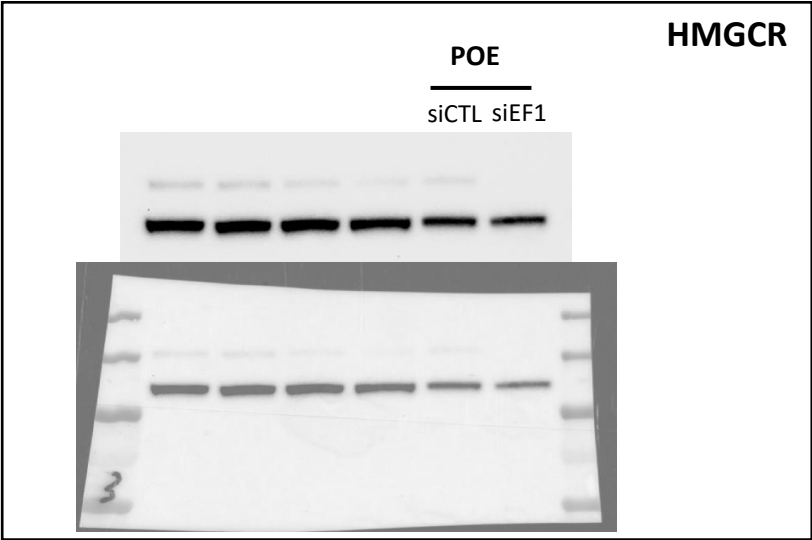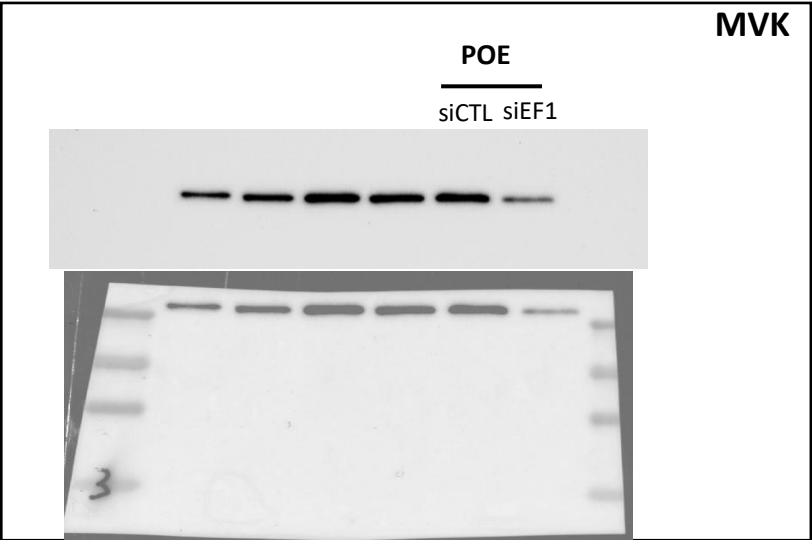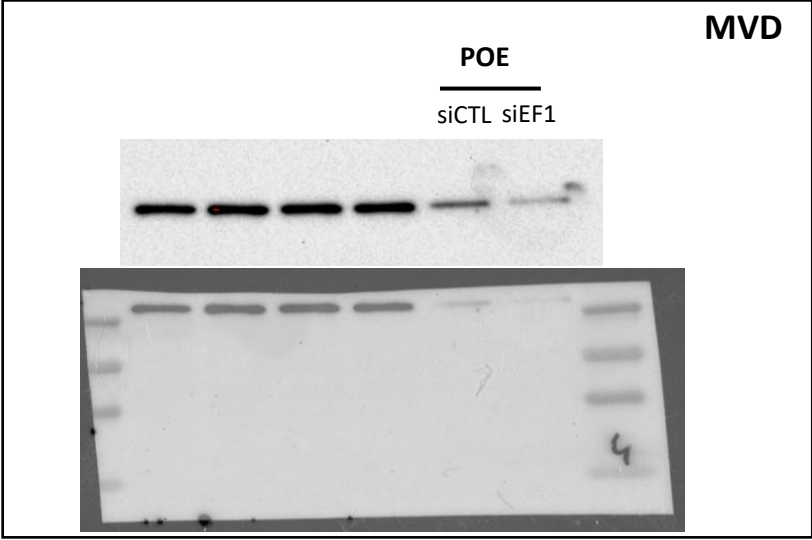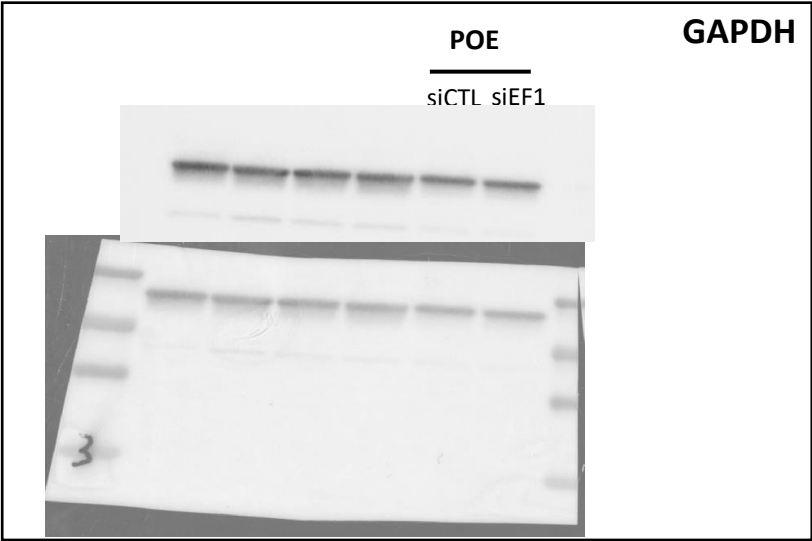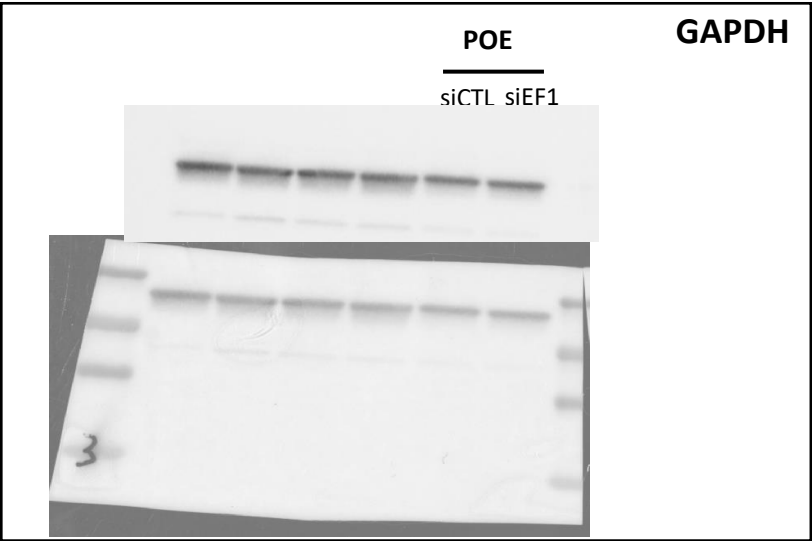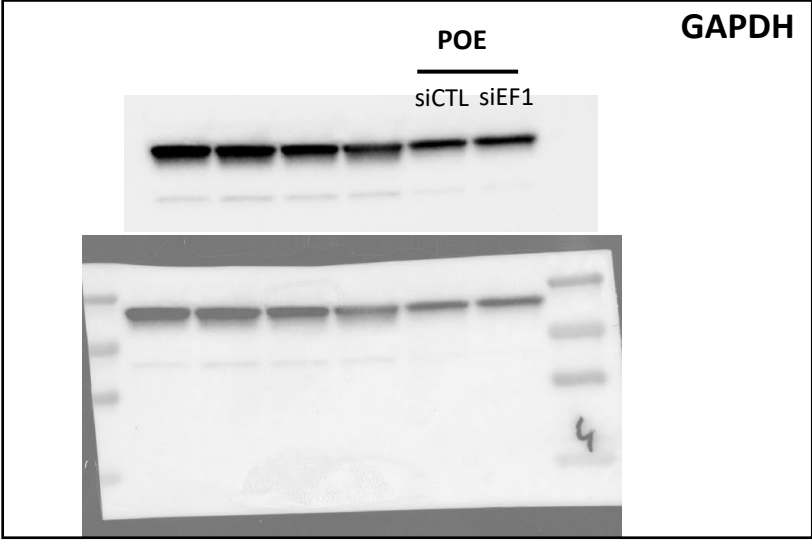

A673\_siEGR2 figure 2B

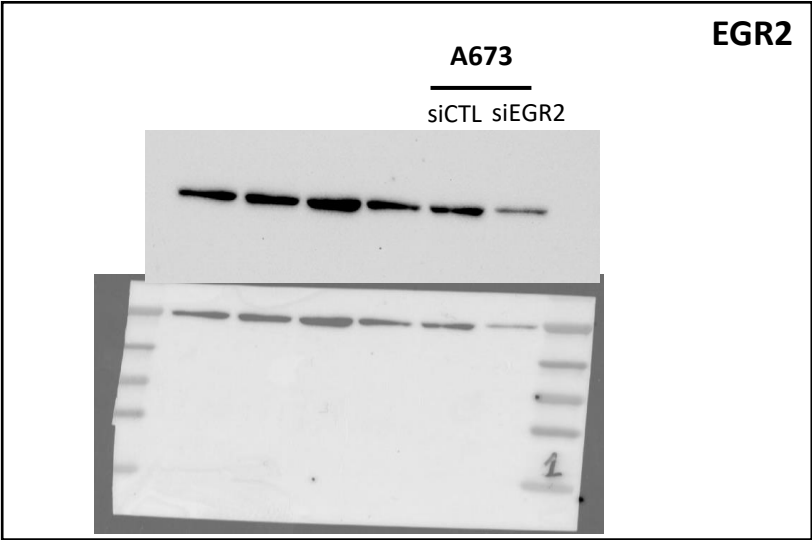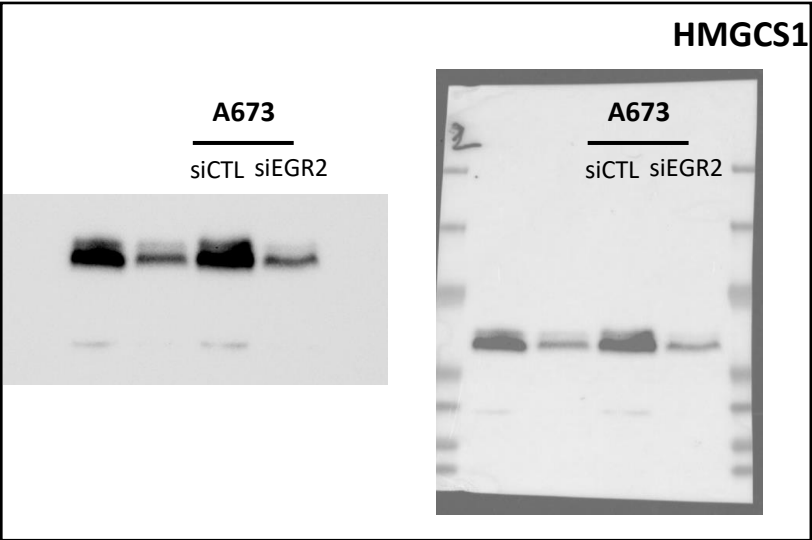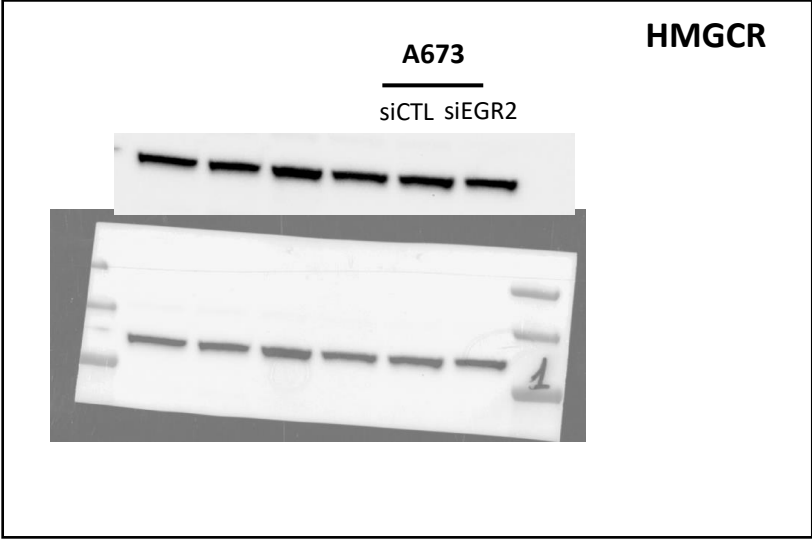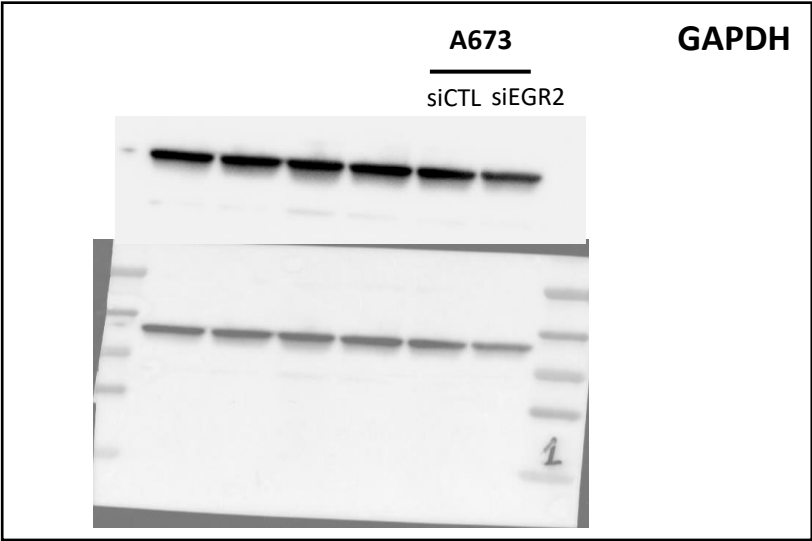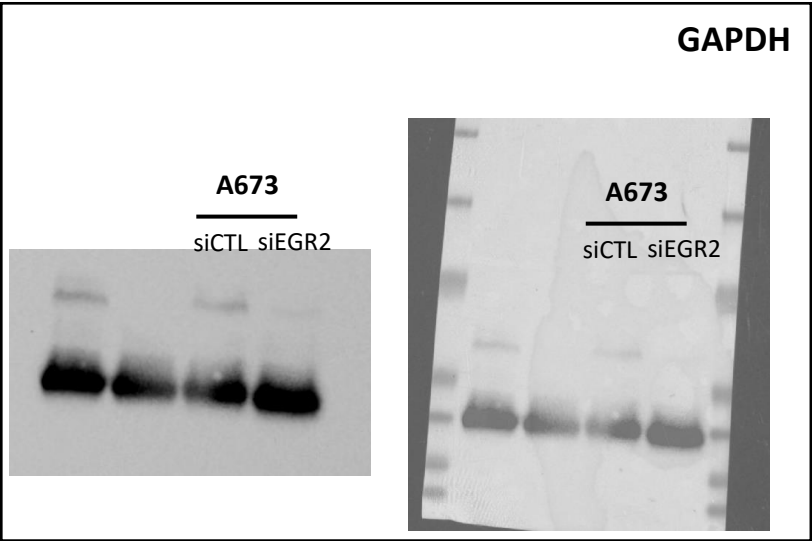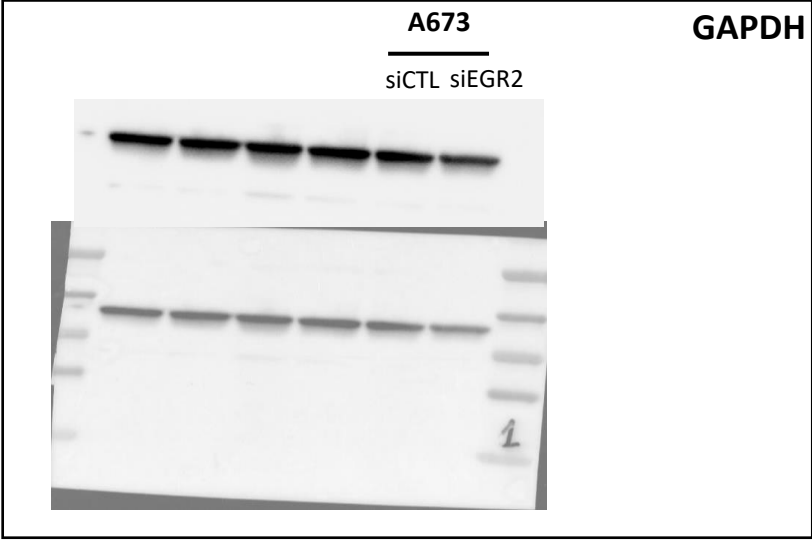

A673\_siEGR2 figure 2B

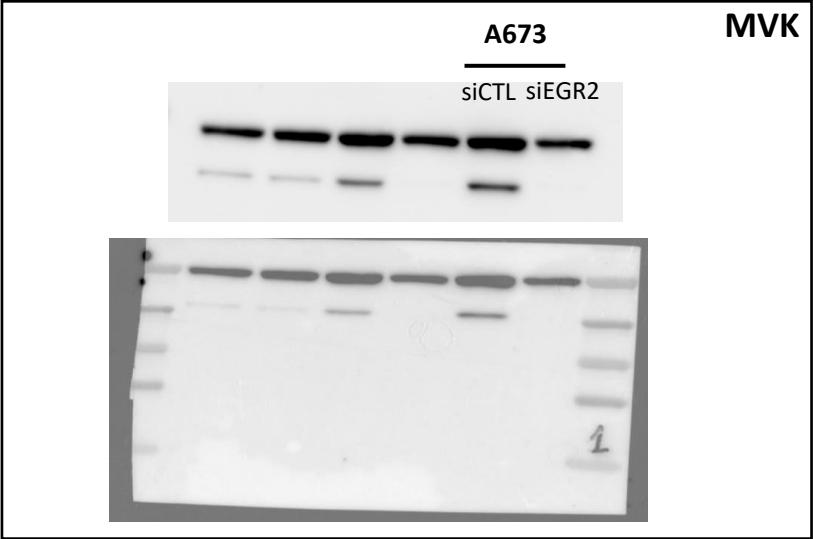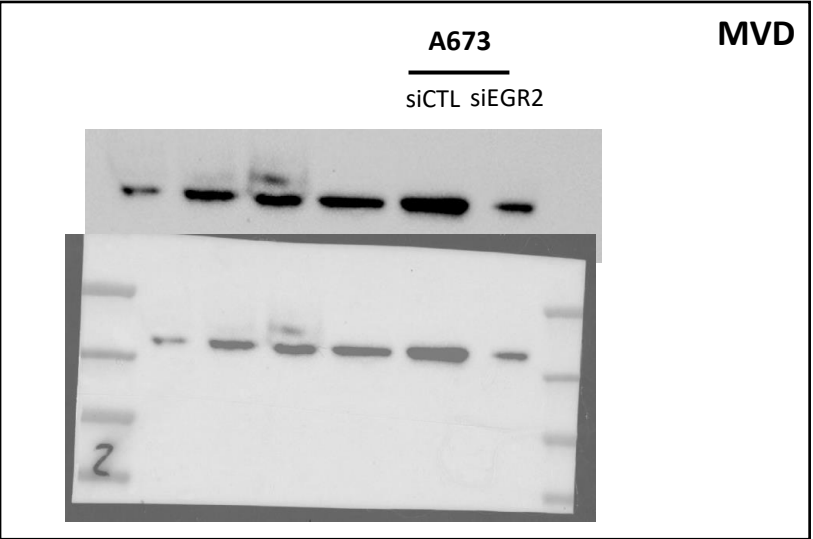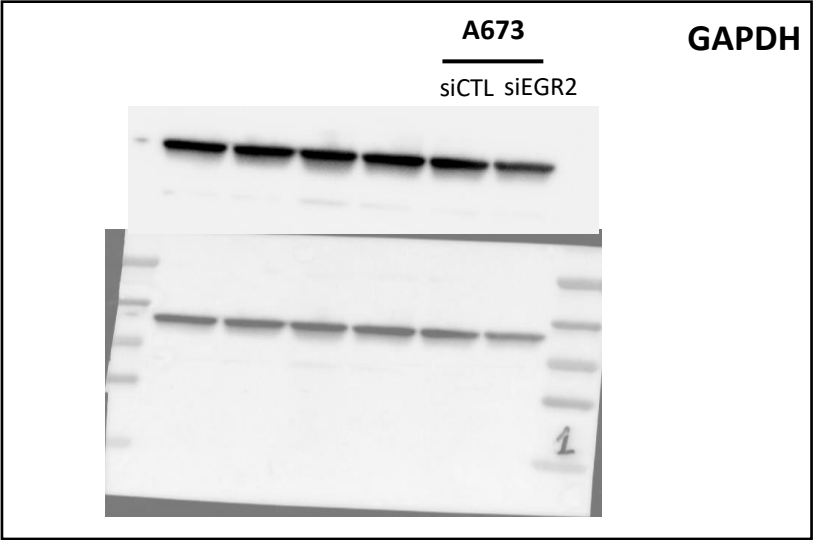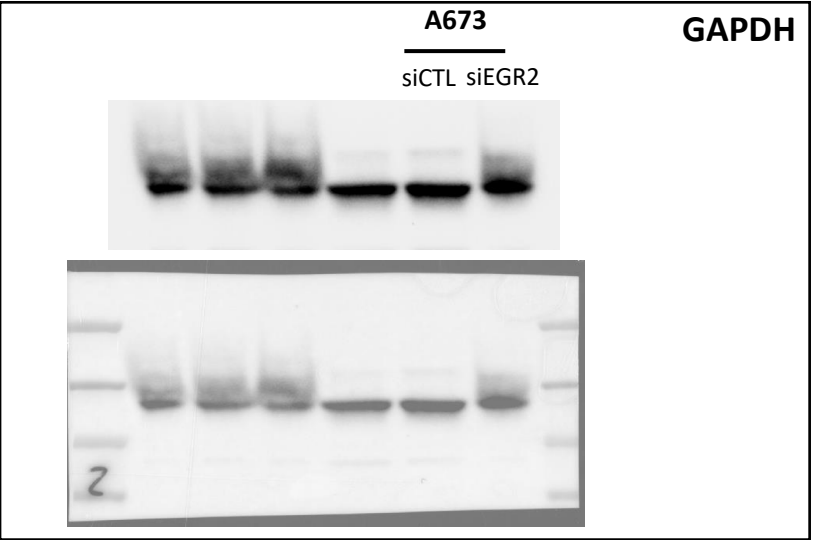

SKNMC\_siEGR2 figure 2B

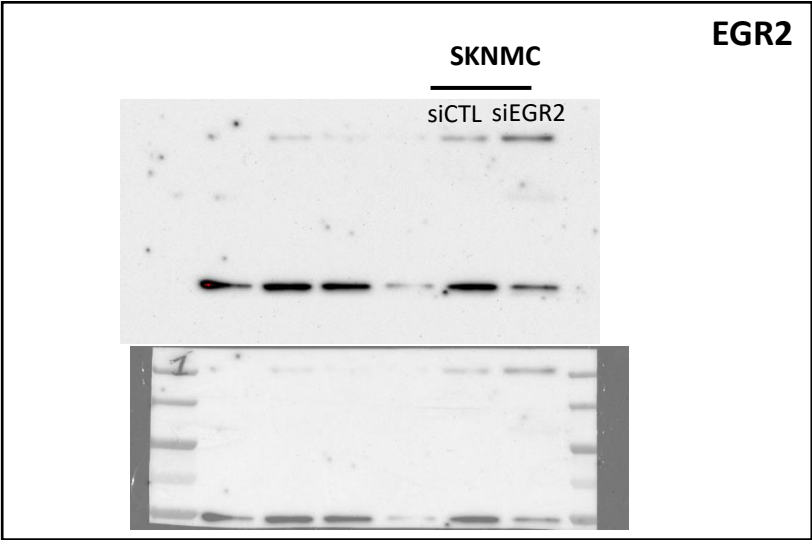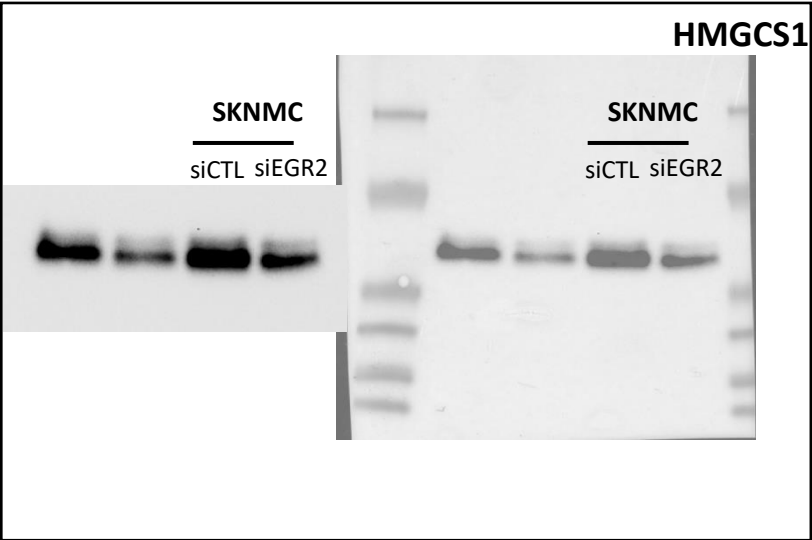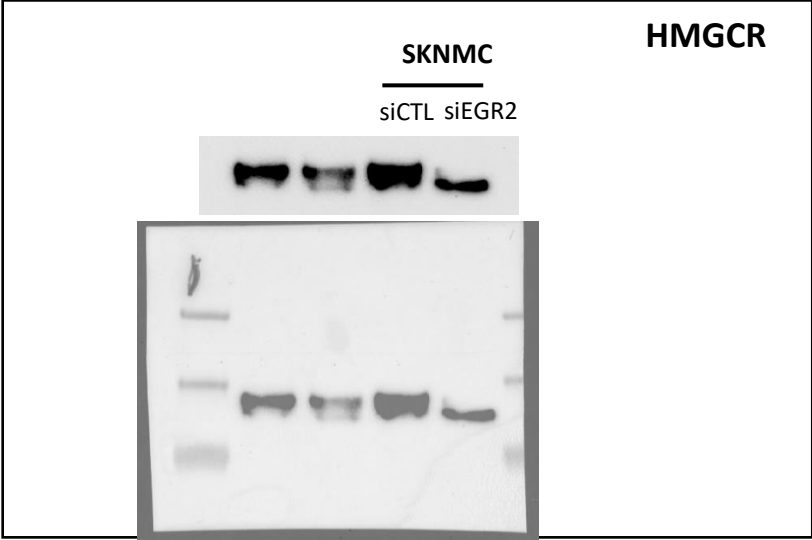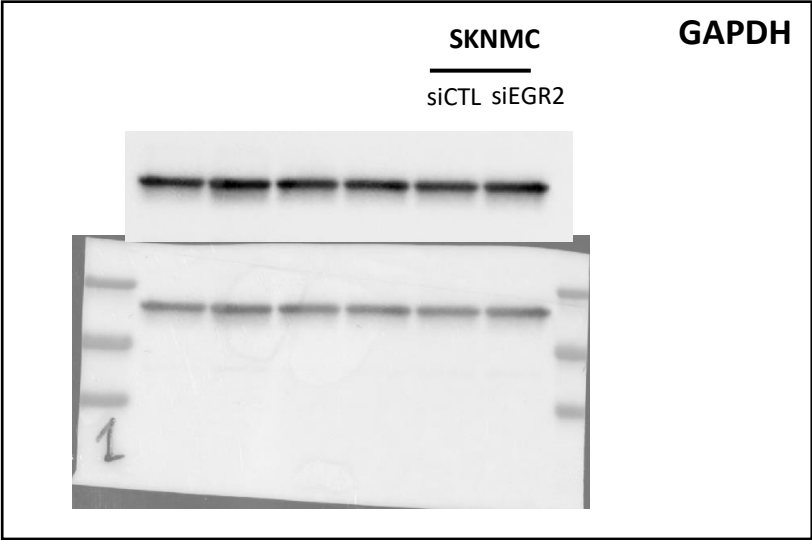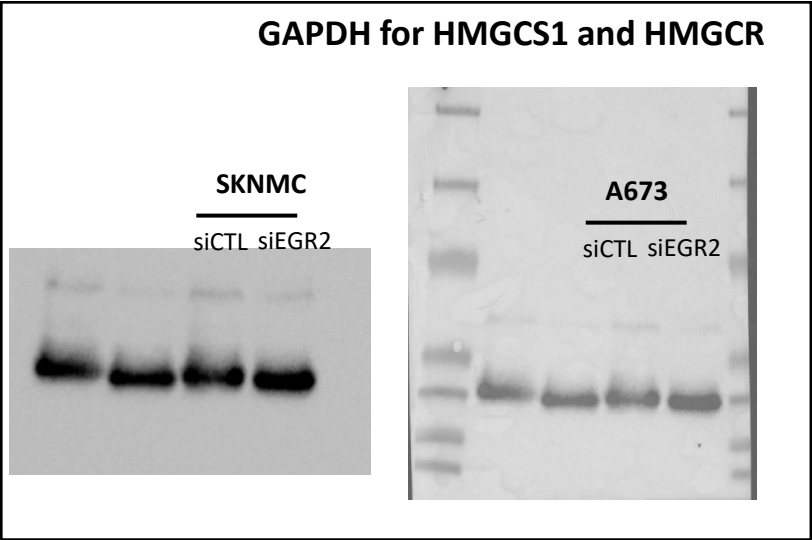

SKNMC\_siEGR2 figure 2B

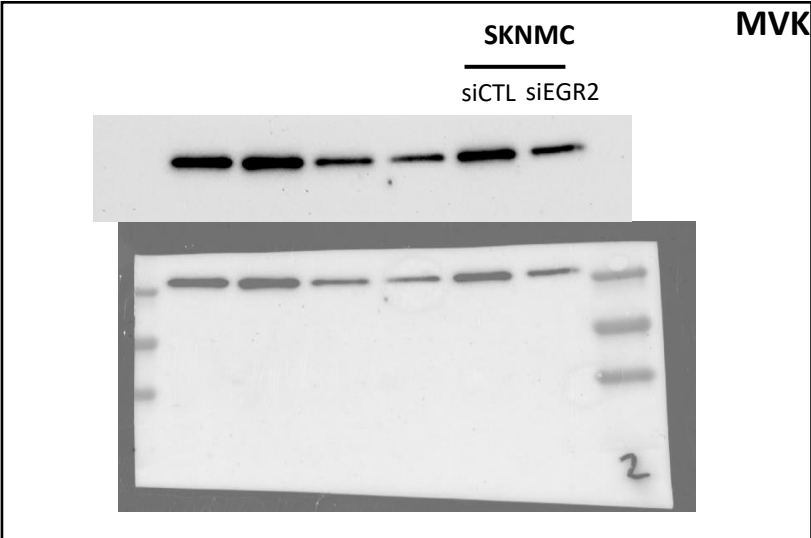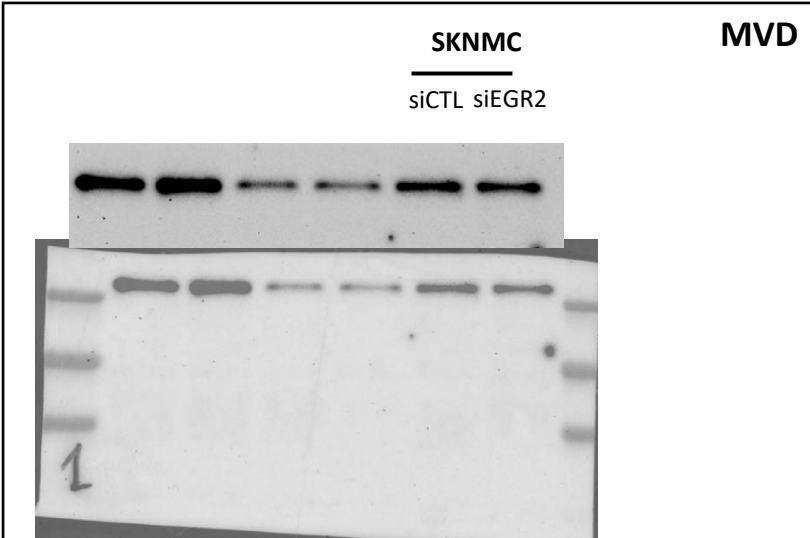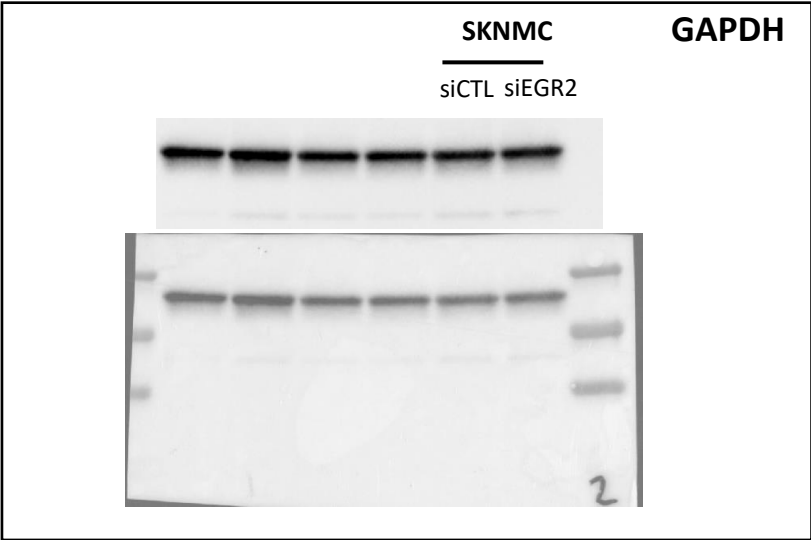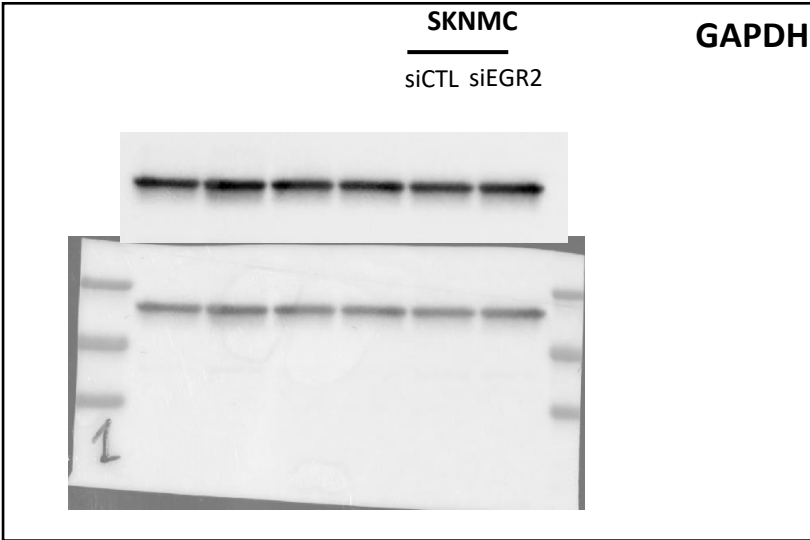

TC71\_siEGR2 figure 2B

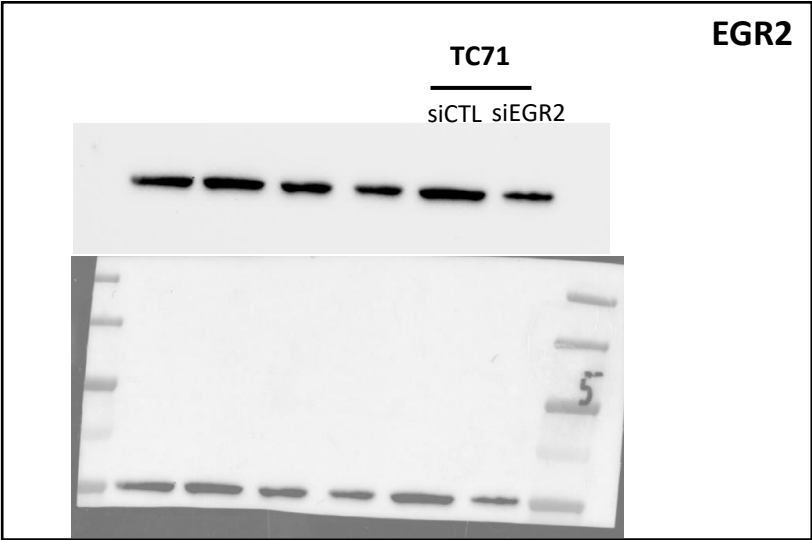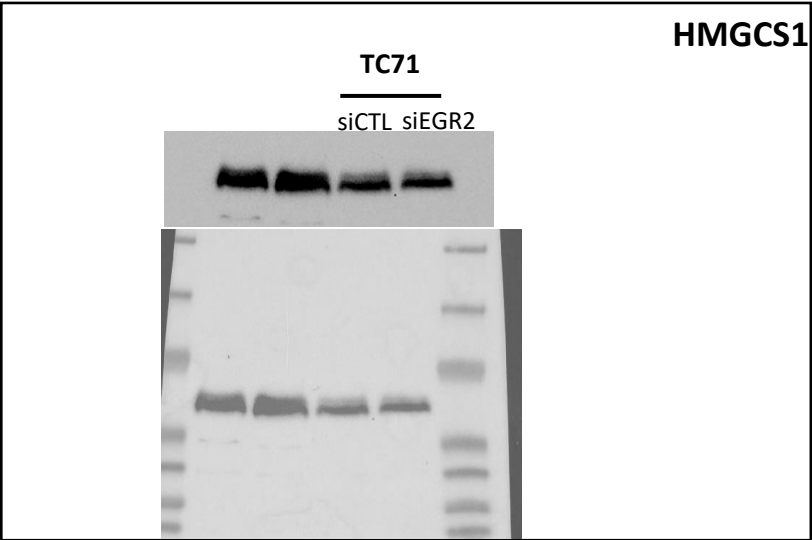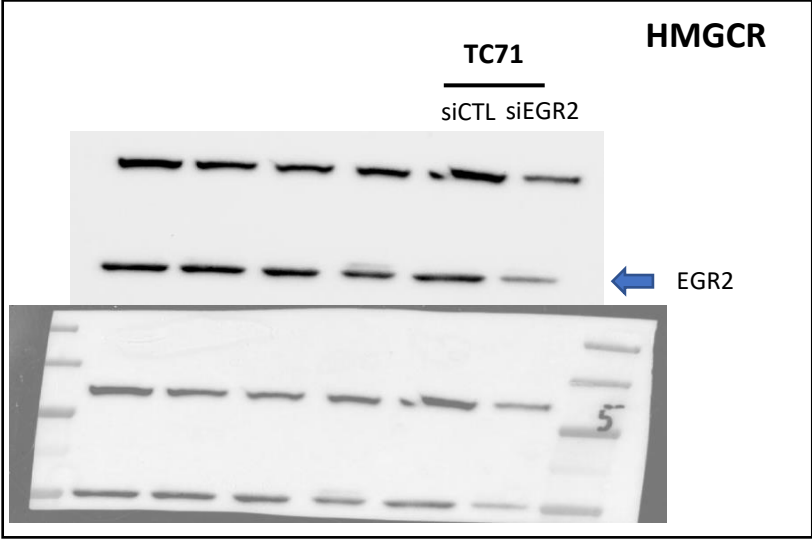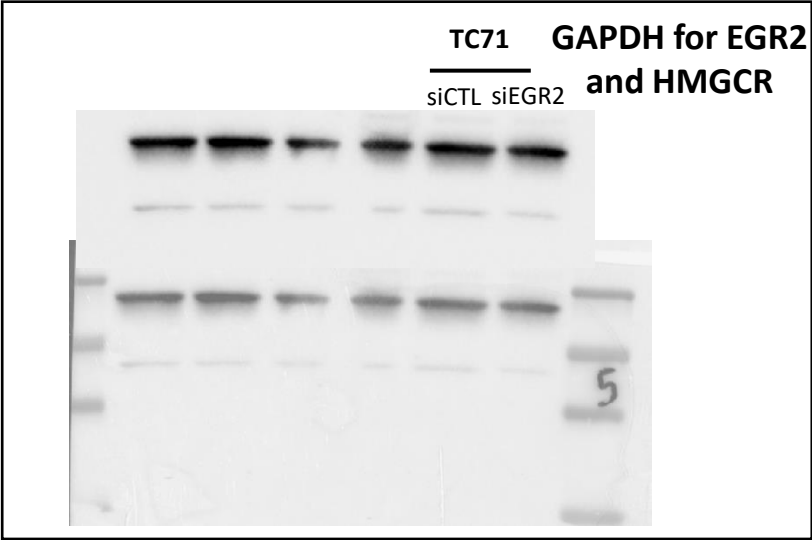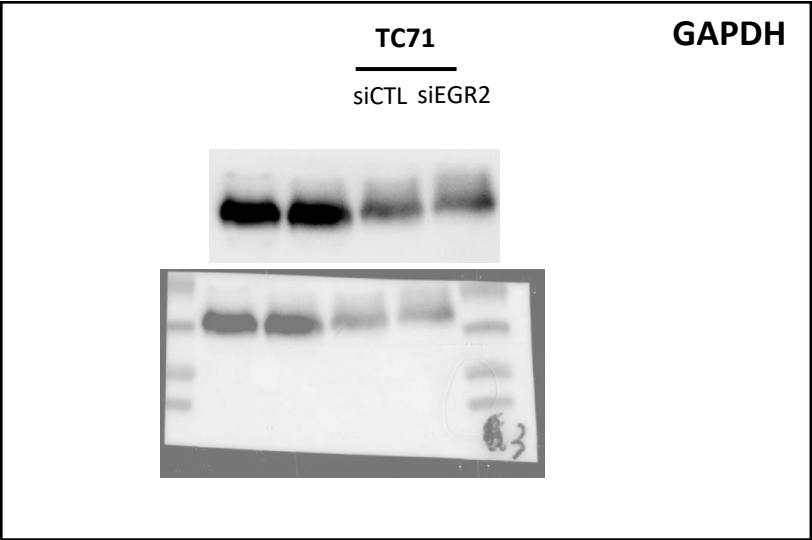

TC71\_siEGR2 figure 2B

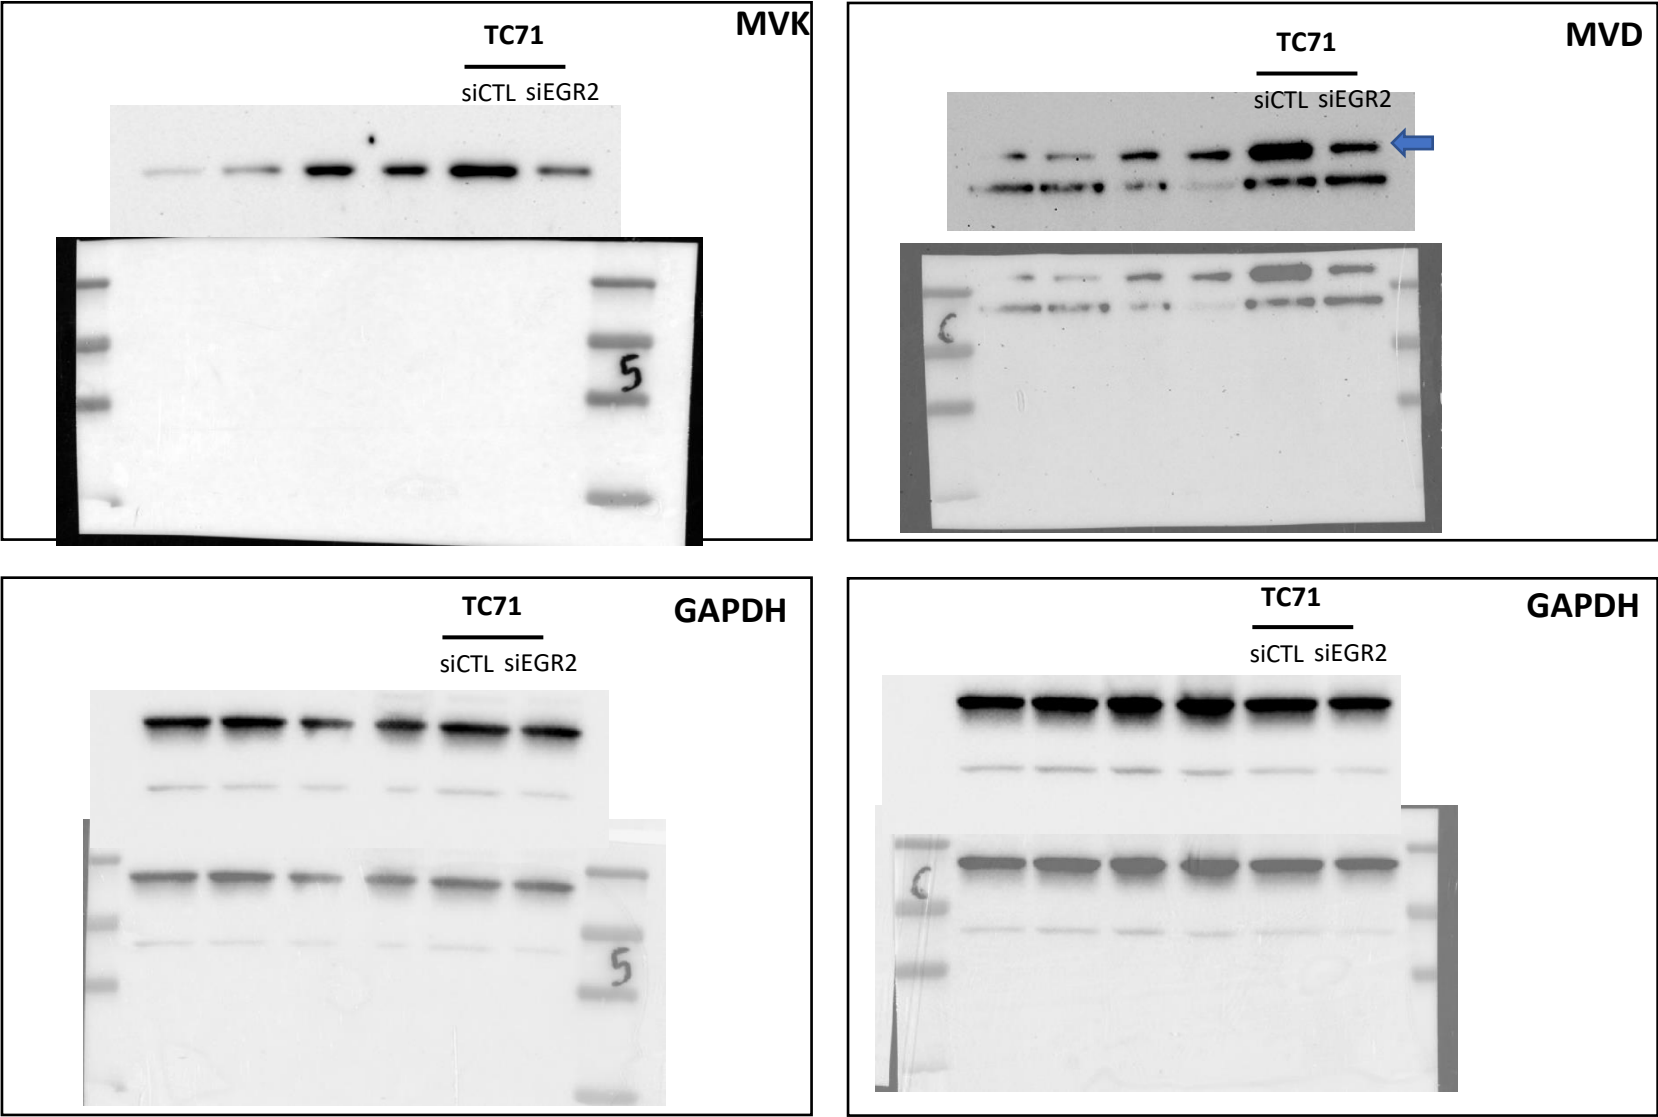



POE\_siEGR2 figure 2B

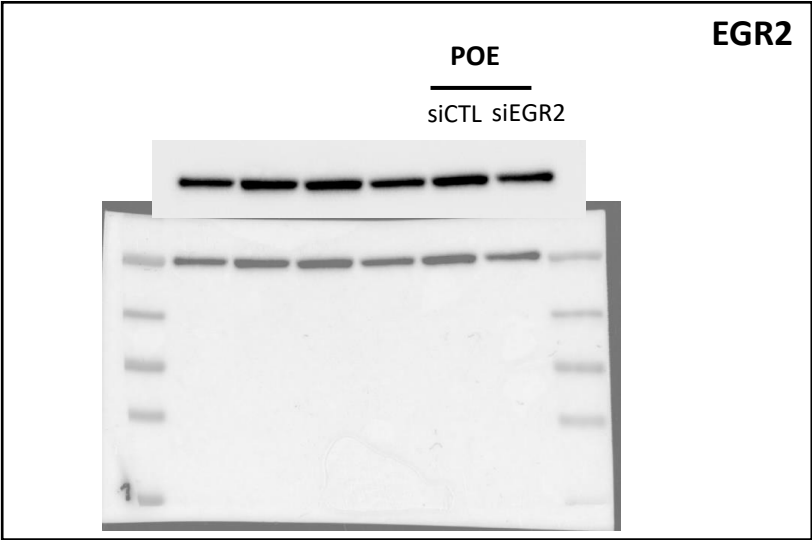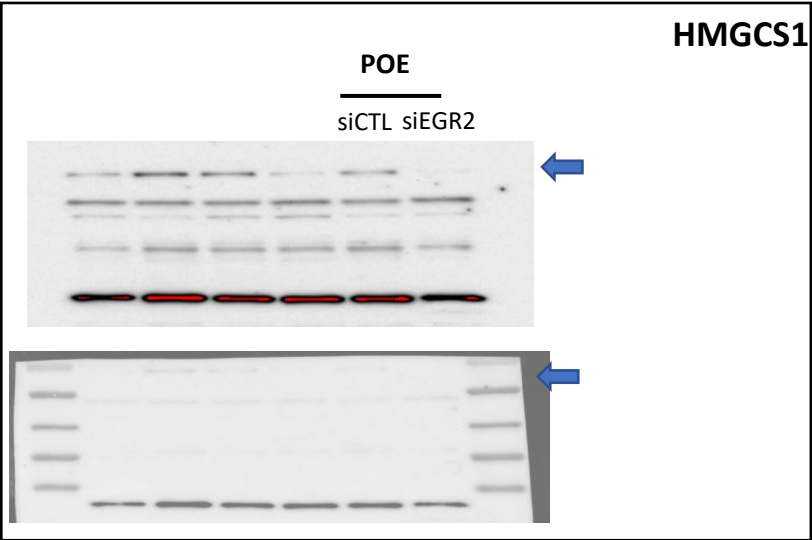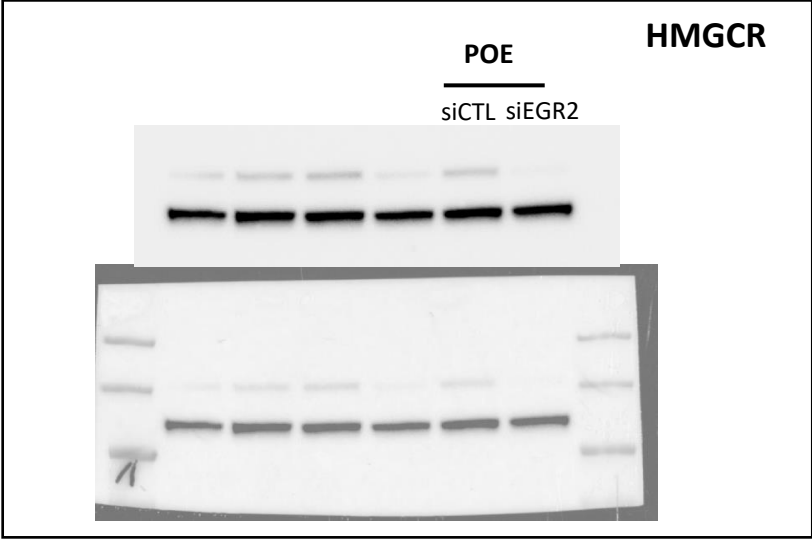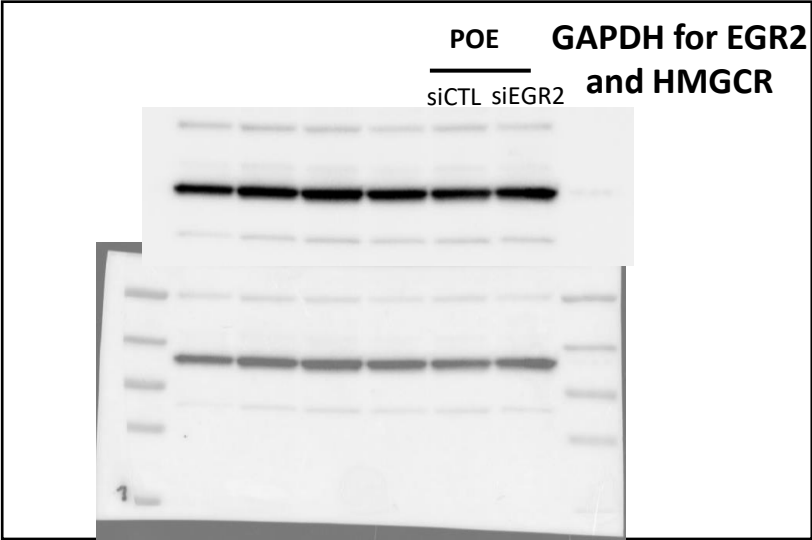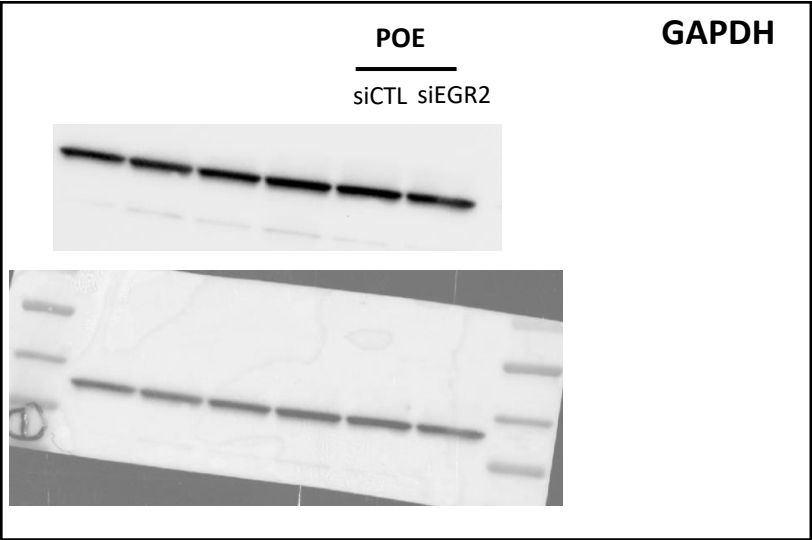

POE\_siEGR2 figure 2B

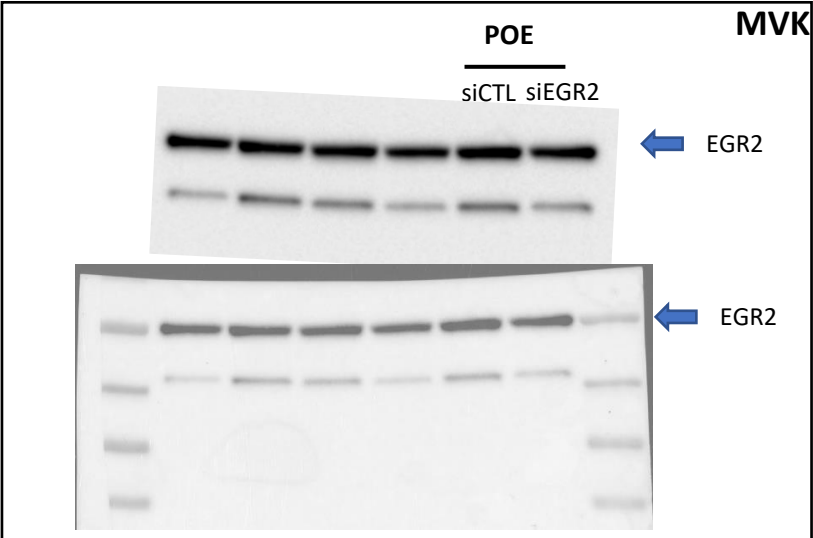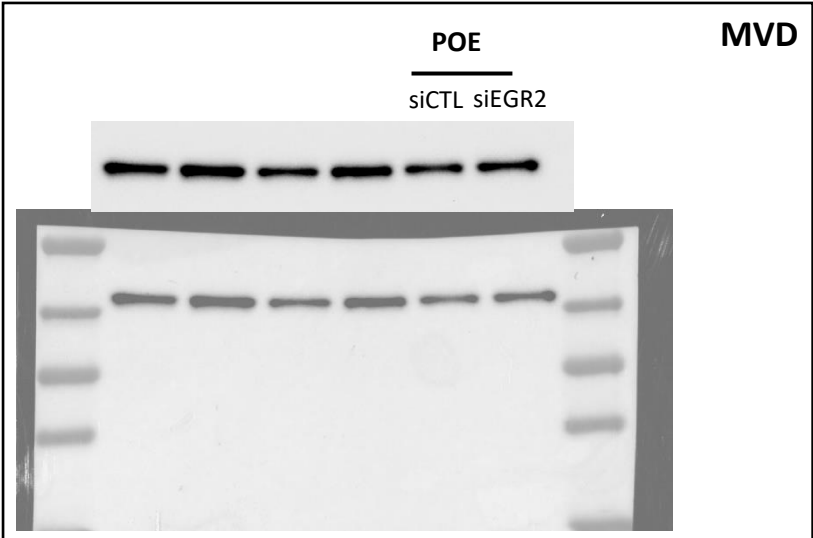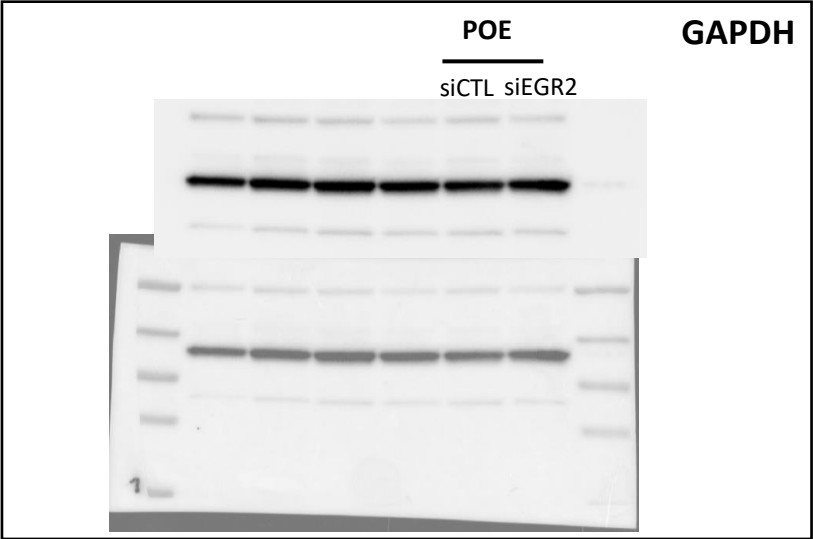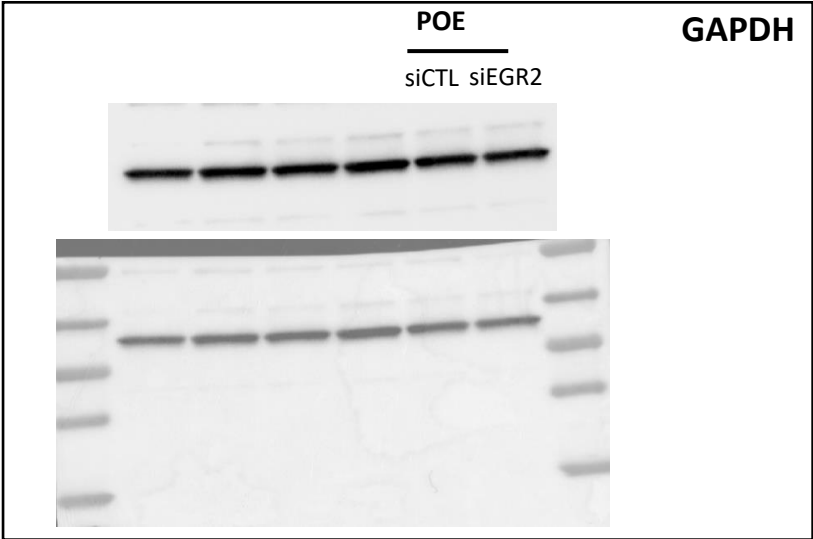

Figure 4F  
Chemidoc acquisition

Chemiluminescence

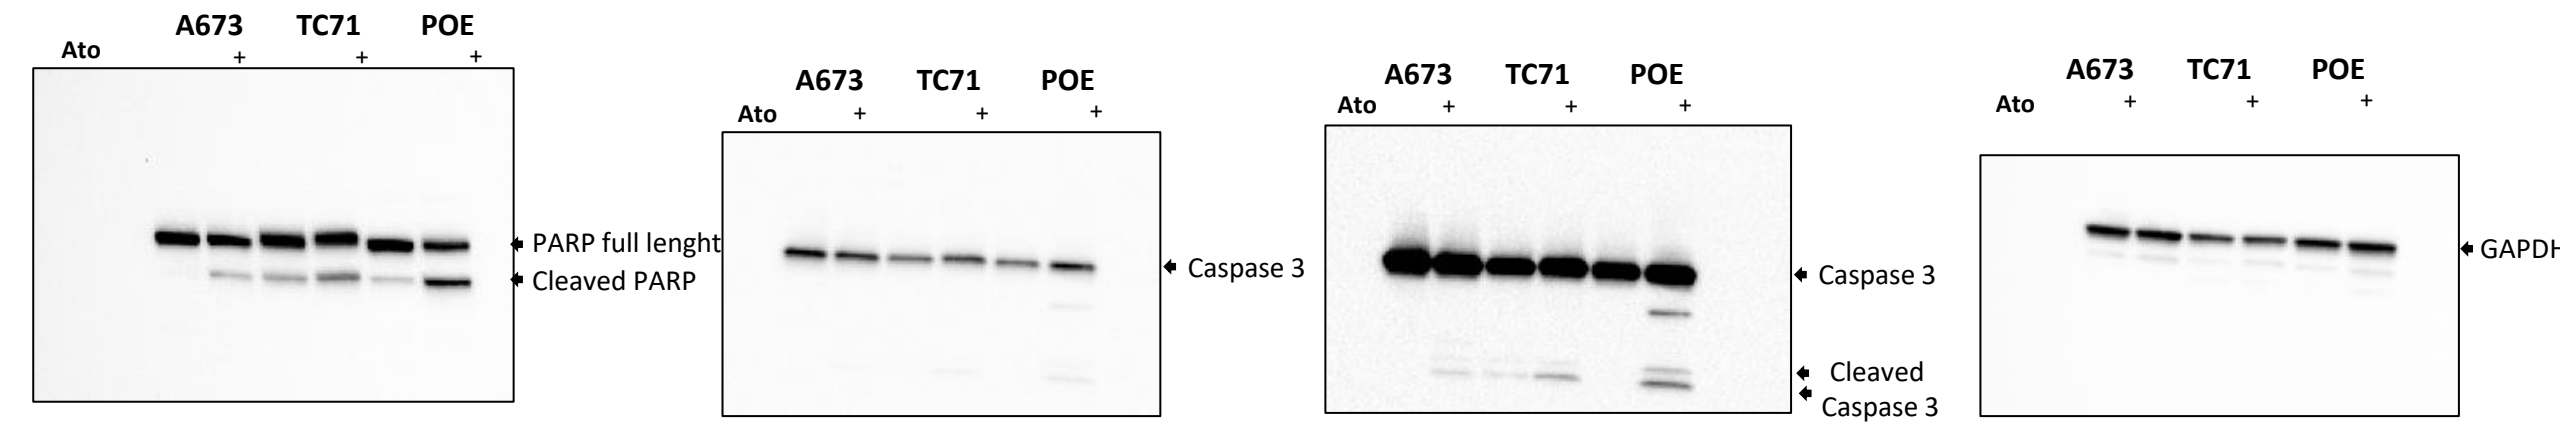

Composite

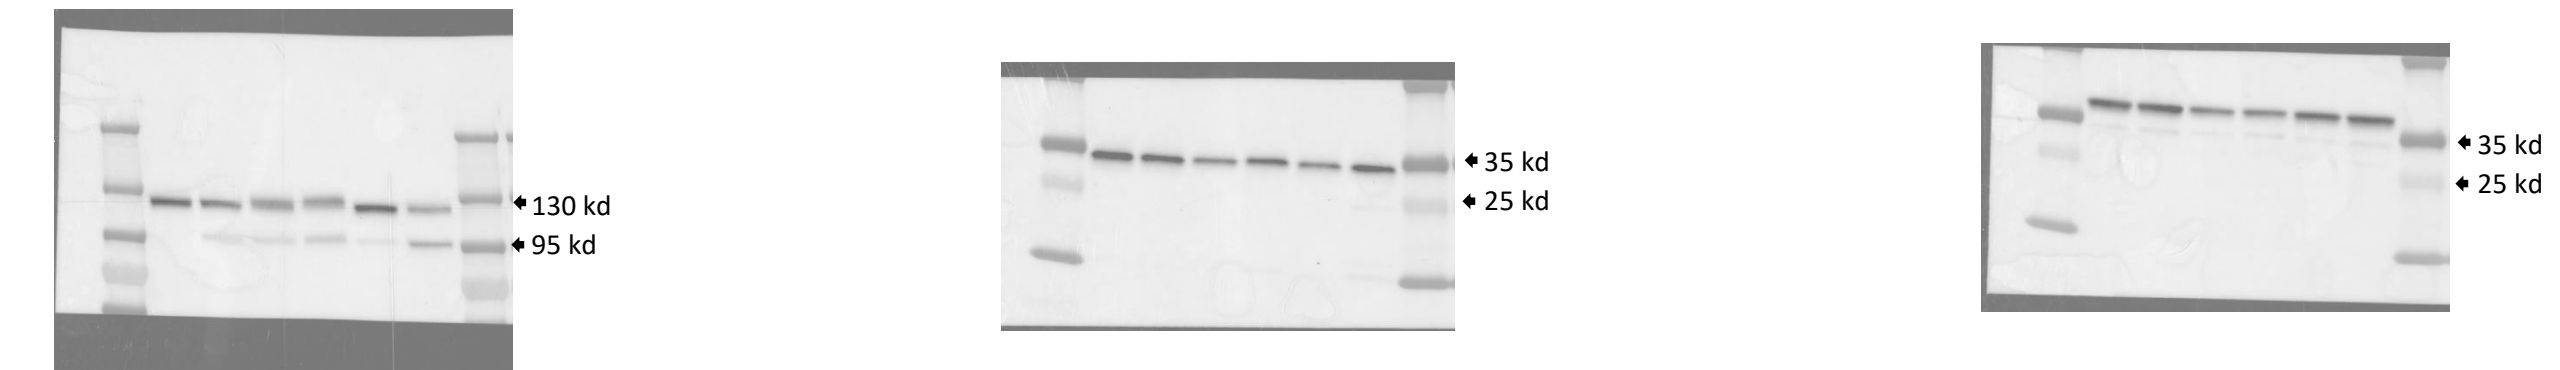

**figure 5A**

**RHOA**

DMSO Ato Ato+  
mev

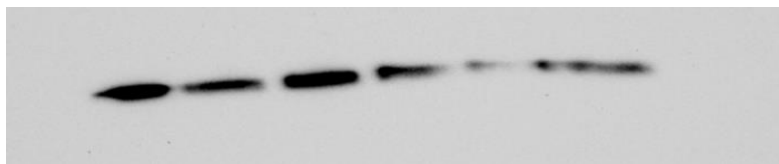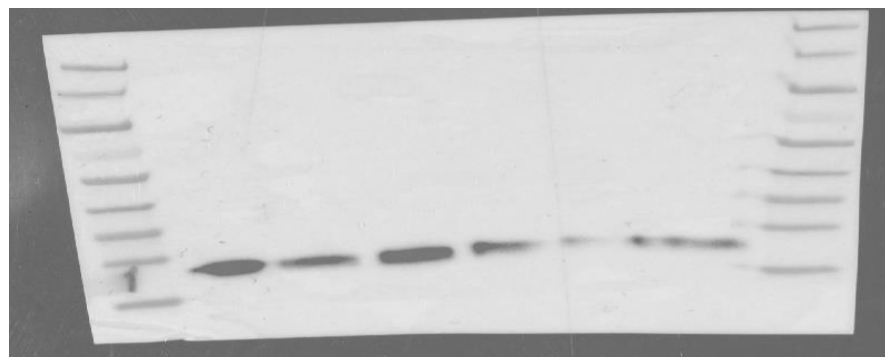

**RAS**

DMSO Ato Ato+  
mev

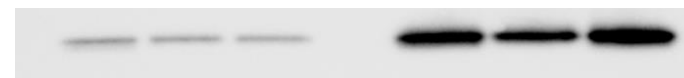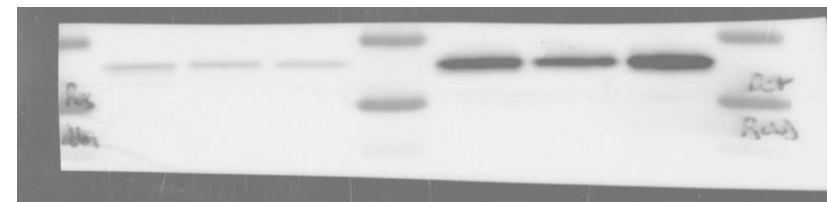

**HLA-A**

DMSO Ato Ato+  
mev

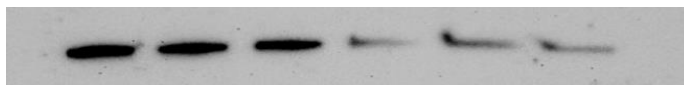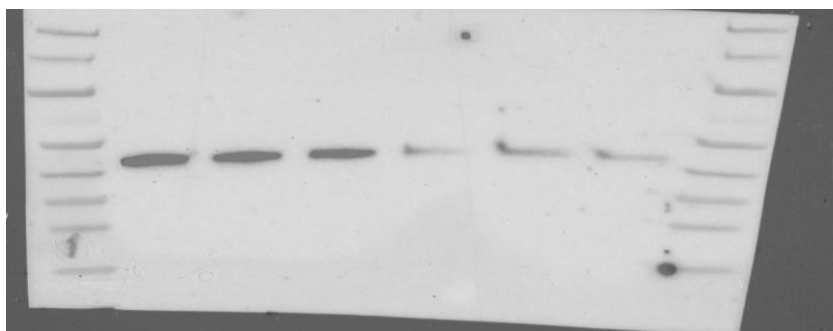

**HLA-A**

DMSO Ato Ato+  
mev

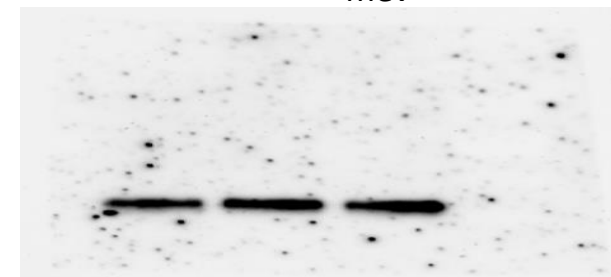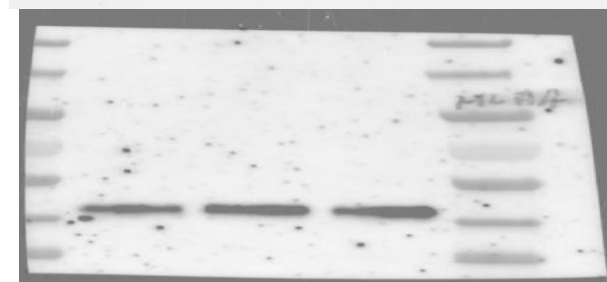

figure 5A

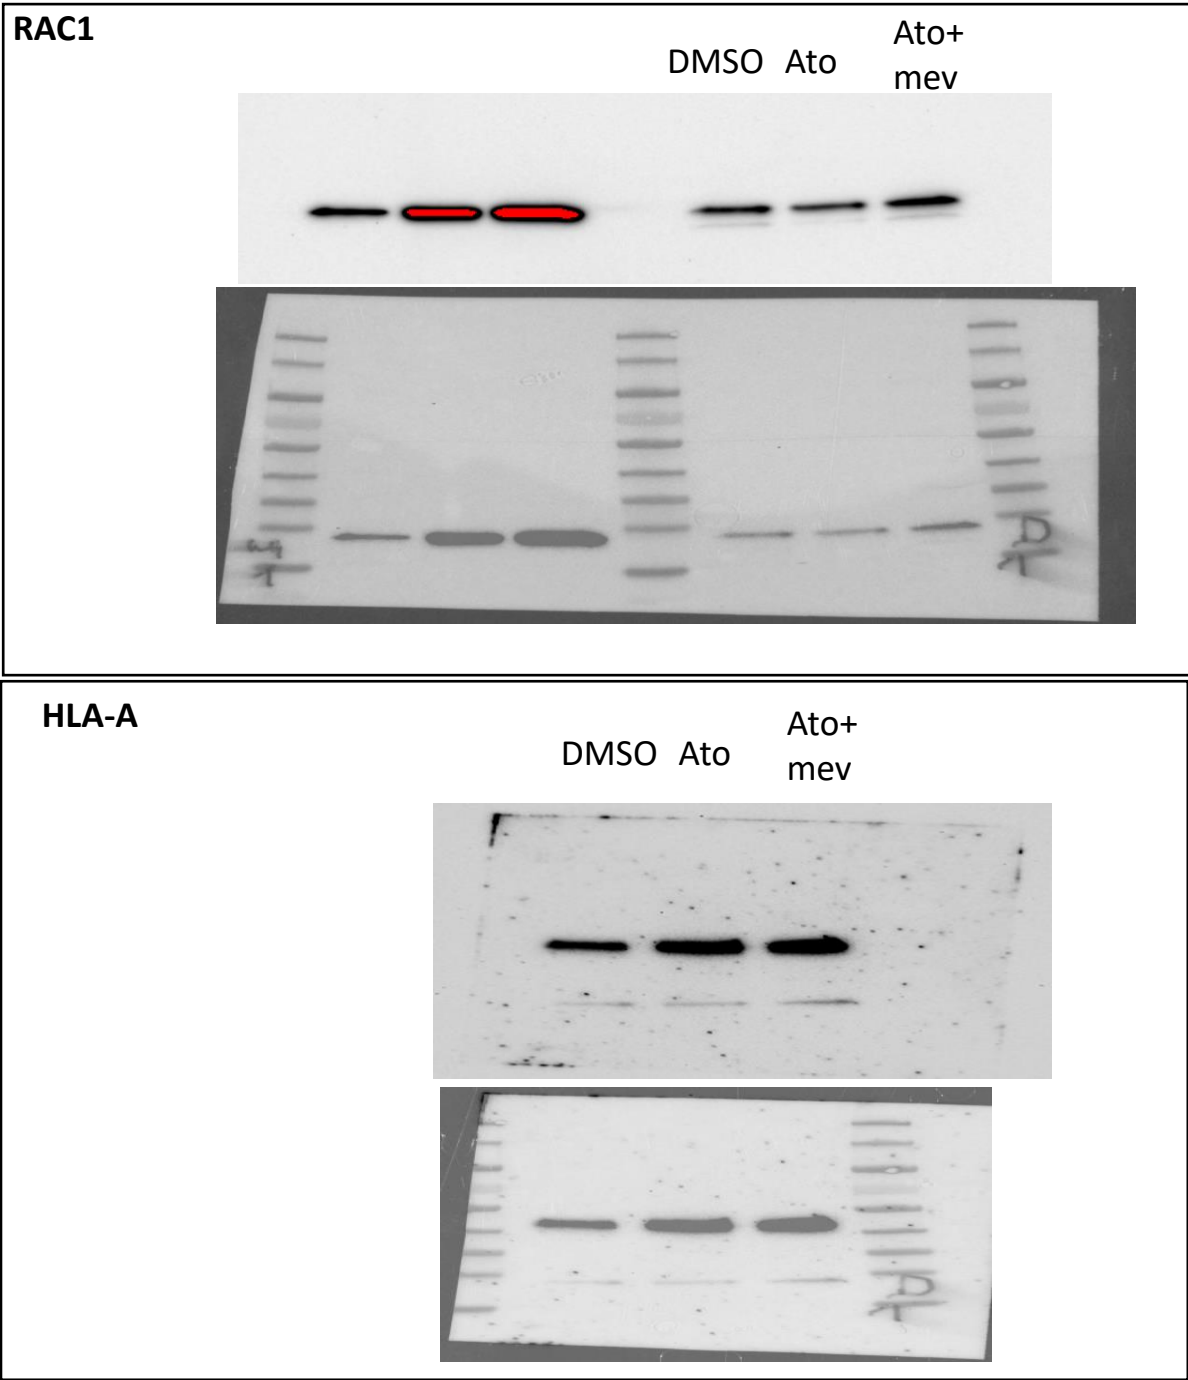

figure 5F and 5G

$\gamma$ H2AX

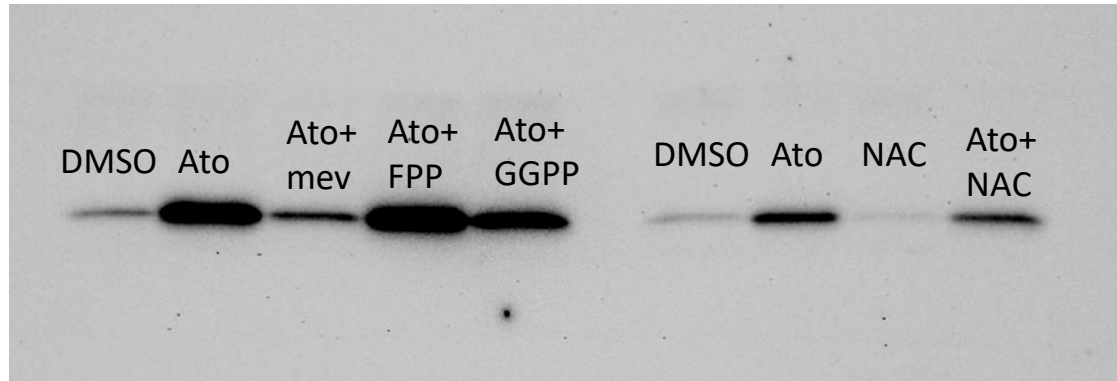

DMSO Ato Ato+ mev Ato+ FPP Ato+ GGPP DMSO Ato NAC Ato+ NAC

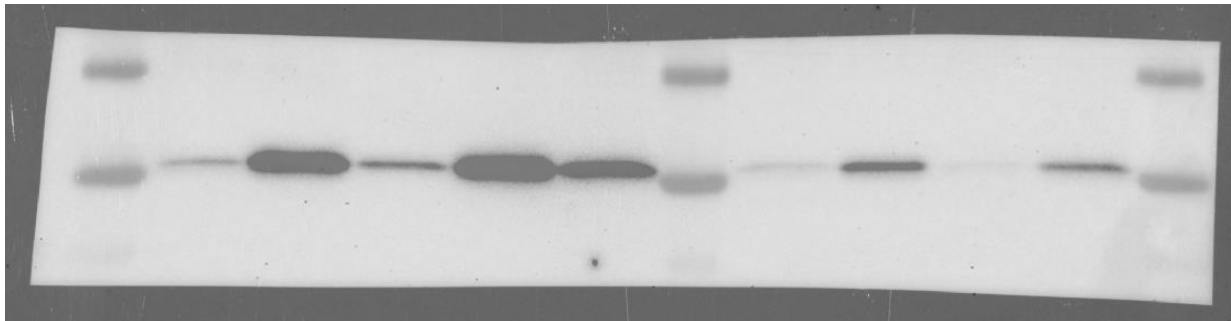

GAPDH

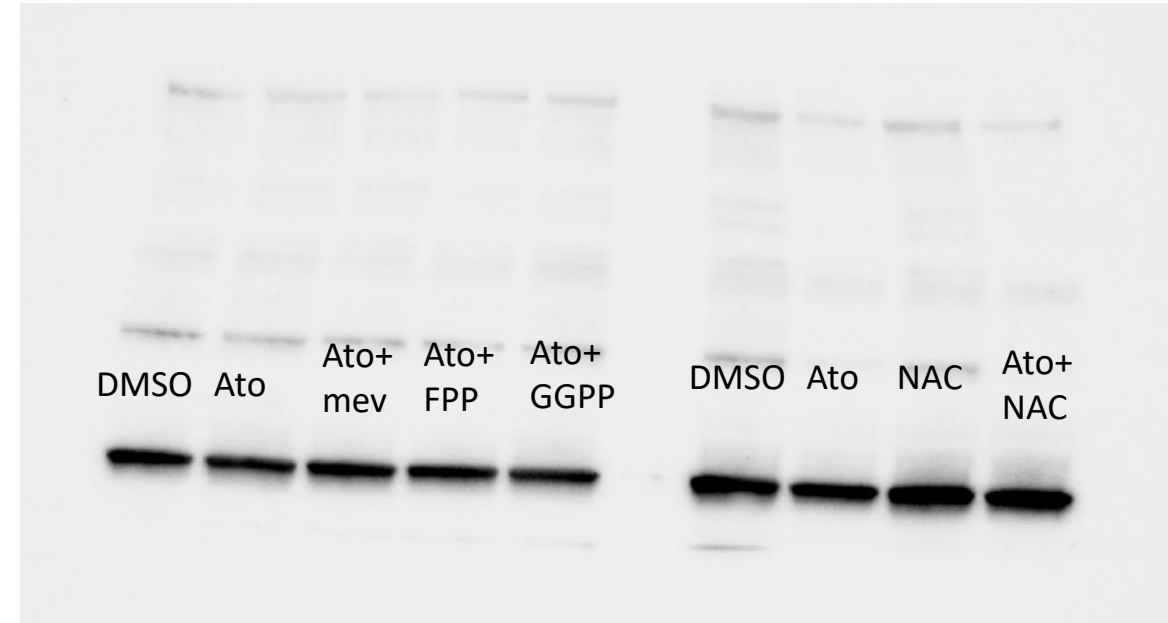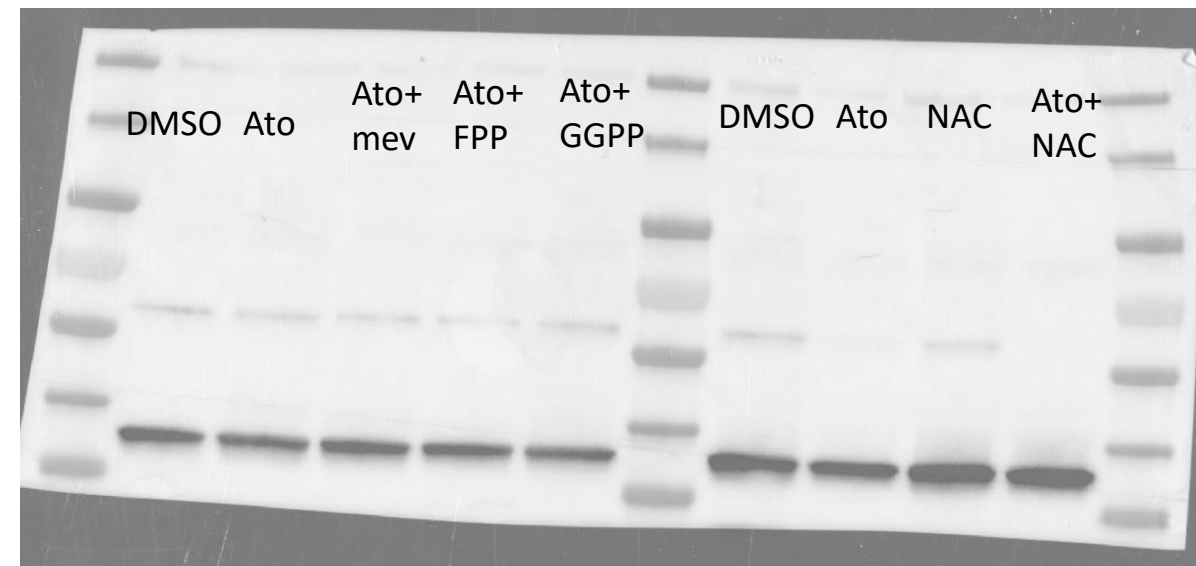

figure S1A

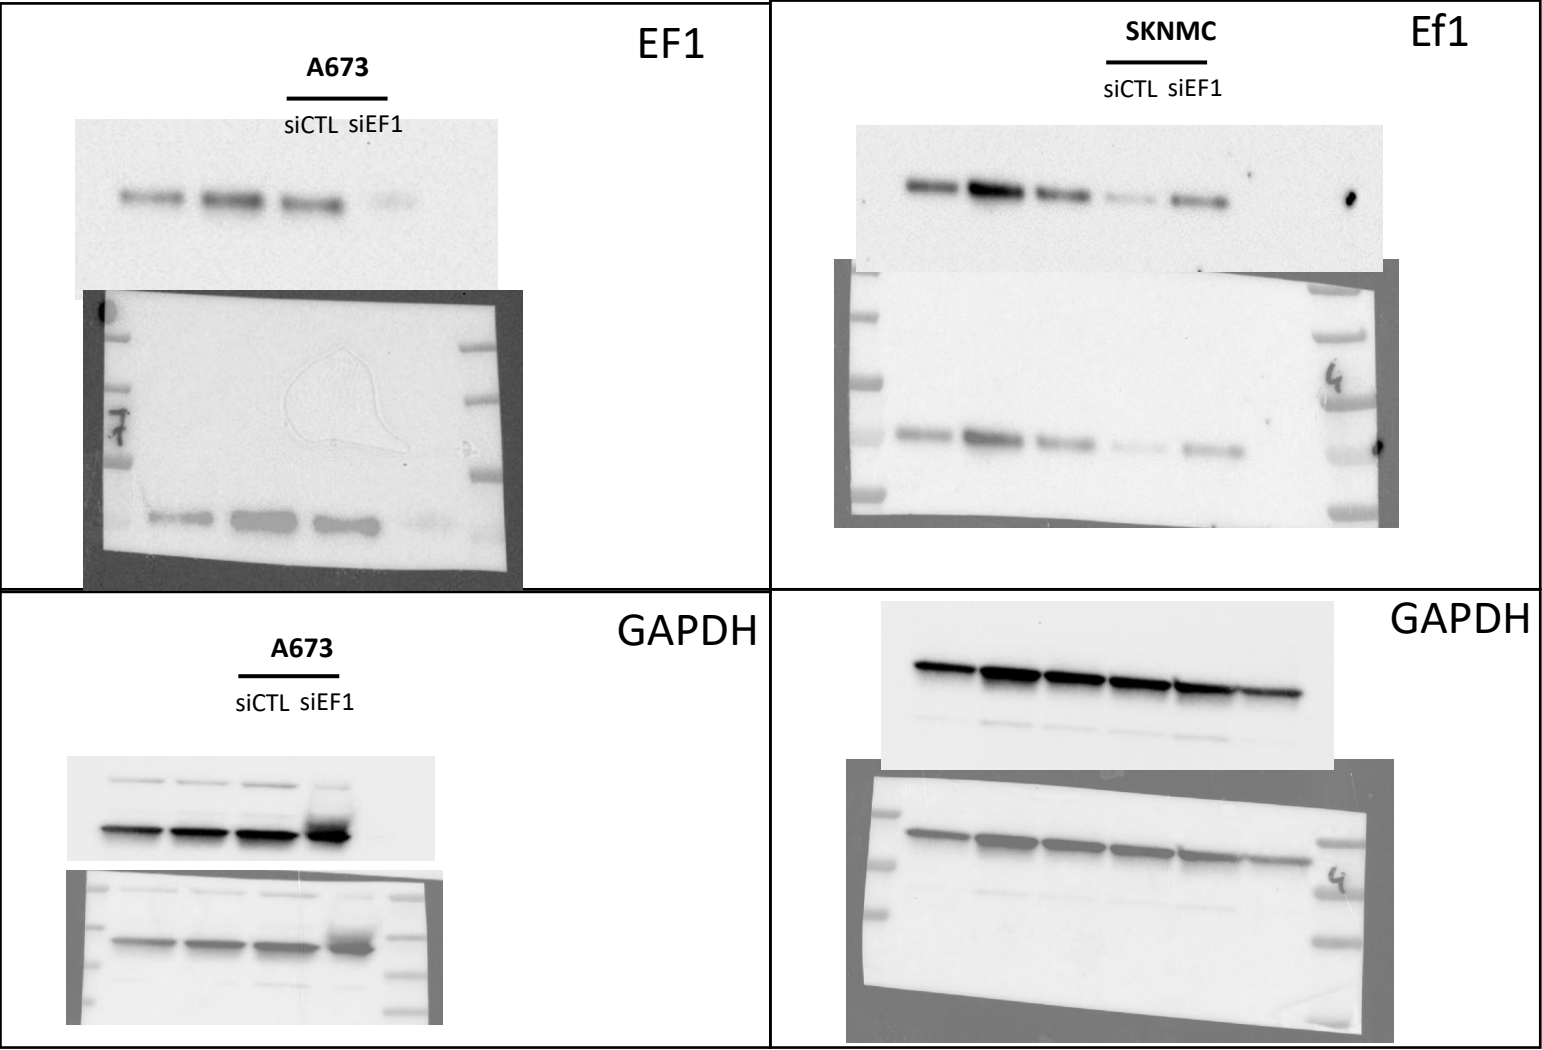

Supplement: s1 [file s1]
