# Supplementary material for: Upregulation of the Mevalonate Pathway through EWSR1-FLI1/EGR2 Regulatory Axis Confers Ewing Cells Exquisite Sensitivity to Statins
Source: Cancers (Basel). 2022 May 8;14(9):2327. doi: 10.3390/cancers14092327 (PMC9100622; doi:10.3390/cancers14092327)
Supplement: Supplementary file 1 [file cancers-14-02327-s001.zip]

Archive with 7 entries (7 files):
- Figure S1.pdf
- Figure S2.pdf
- Figure S3.pdf
- Figure S4.pdf
- File S1.pdf
- Table S1.xlsx
- Table S2.xlsx
