# Supplementary material for: Upregulation of the Mevalonate Pathway through EWSR1-FLI1/EGR2 Regulatory Axis Confers Ewing Cells Exquisite Sensitivity to Statins
Source: Cancers (Basel). 2022 May 8;14(9):2327. doi: 10.3390/cancers14092327 (PMC9100622; doi:10.3390/cancers14092327)
Supplement: Supplementary file 1 [file cancers-14-02327-s001.zip › Table S1.xlsx]

## Sheet: Feuil1
Motif ID	Alt ID	Sequence name	MACS Peaks +/- 500bp	Strand	Motif_Start	Motif_End	p-value	q-value	Matched Sequence
EGR2_HUMAN.H11MO.1.A	EGR2	HMGCR	chr5:74,632,038-74,633,602	+	861	876	1.14e-05	0.0217	GAGCTGTGGGCGGTTG
EGR2_HUMAN.H11MO.1.A	EGR2	HMGCR	chr5:74,632,038-74,633,602	+	1141	1156	1.37e-05	0.0217	GATGGGTGGGAGCGGG
EGR2_HUMAN.H11MO.1.A	EGR2	HMGCR	chr5:74,632,038-74,633,602	+	1143	1158	2.82e-05	0.0217	TGGGTGGGAGCGGGGT
EGR2_HUMAN.H11MO.1.A	EGR2	HMGCR	chr5:74,632,038-74,633,602	+	1112	1127	3.18e-05	0.0217	GGGGCAGGGGCGGCGG
EGR2_HUMAN.H11MO.1.A	EGR2	HMGCR	chr5:74,632,038-74,633,602	-	721	736	4.62e-05	0.025	GCTGCCTAGGCGGAGG
EGR2_HUMAN.H11MO.1.A	EGR2	HMGCR	chr5:74,632,038-74,633,602	-	744	759	4.67e-05	0.025	GCTGTGGGGGCGCACG
EGR2_HUMAN.H11MO.1.A	EGR2	HMGCR	chr5:74,632,038-74,633,602	+	1133	1148	4.78e-05	0.025	GGGGCGGAGATGGGTG
EGR2_HUMAN.H11MO.1.A	EGR2	HMGCR	chr5:74,632,038-74,633,602	+	1107	1122	5.86e-05	0.0253	GAAGAGGGGCAGGGGC
EGR2_HUMAN.H11MO.1.A	EGR2	HMGCR	chr5:74,632,038-74,633,602	-	530	545	8.61e-05	0.0291	GAAGCGGAGGCGGCCA
EGR2_HUMAN.H11MO.1.A	EGR2	HMGCS1	chr5:43,312,995-43,314,463	-	114	129	3.02e-05	0.0217	GGTGAGTGGGGGGTGT
EGR2_HUMAN.H11MO.1.A	EGR2	HMGCS1	chr5:43,312,995-43,314,463	-	98	113	5.74e-05	0.0253	CAGGAGGGGGAGAGAA
EGR2_HUMAN.H11MO.1.A	EGR2	HMGCS1	chr5:43,312,995-43,314,463	-	156	171	5.83e-05	0.0253	GAGGAGTTGGAGGTGC
EGR2_HUMAN.H11MO.1.A	EGR2	HMGCS1	chr5:43,312,995-43,314,463	-	292	307	6.81e-05	0.028	TGAGCGGGGCCGGGCG
EGR2_HUMAN.H11MO.1.A	EGR2	HMGCS1	chr5:43,312,995-43,314,463	-	333	348	8.35e-05	0.0291	AGGACGTAGGCGTGGA
EGR2_HUMAN.H11MO.1.A	EGR2	MVD	chr16:88,729,100-88,730,293	+	1020	1035	1.78e-07	0.00141	GCTGTGTGGGAGGGAG
EGR2_HUMAN.H11MO.1.A	EGR2	MVD	chr16:88,729,100-88,730,293	+	1038	1053	3.02e-05	0.0217	TGTGCGGGGCCGTGGG
EGR2_HUMAN.H11MO.1.A	EGR2	MVD	chr16:88,729,100-88,730,293	-	452	467	8.61e-05	0.0291	CGTGAGGAGGCAGAGG
EGR2_HUMAN.H11MO.1.A	EGR2	MVD	chr16:88,729,100-88,730,293	+	1058	1073	9.64e-05	0.0312	TGTGCGGGGCTGAGGG
EGR2_HUMAN.H11MO.1.A	EGR2	MVK	chr12:110,010,744-110,012,071	-	393	408	2.08e-05	0.0217	GGTGAGTGGCTGGCGG
EGR2_HUMAN.H11MO.1.A	EGR2	MVK	chr12:110,010,744-110,012,071	-	600	615	3.04e-05	0.0217	CAGCTGTGGGTGGAGT
EGR2_HUMAN.H11MO.1.A	EGR2	MVK	chr12:110,010,744-110,012,071	+	907	922	3.12e-05	0.0217	GCGGCCGGGGAGGCGG
EGR2_HUMAN.H11MO.1.A	EGR2	MVK	chr12:110,010,744-110,012,071	-	826	841	3.12e-05	0.0217	GGGGAGGAGGCGTTGT
EGR2_HUMAN.H11MO.1.A	EGR2	MVK	chr12:110,010,744-110,012,071	+	860	875	3.31e-05	0.0217	GGGTTGTGGGAGTTGG
EGR2_HUMAN.H11MO.1.A	EGR2	MVK	chr12:110,010,744-110,012,071	+	913	928	5.53e-05	0.0253	GGGGAGGCGGCGGCGG
EGR2_HUMAN.H11MO.1.A	EGR2	MVK	chr12:110,010,744-110,012,071	+	910	925	5.62e-05	0.0253	GCCGGGGAGGCGGCGG
EGR2_HUMAN.H11MO.1.A	EGR2	MVK	chr12:110,010,744-110,012,071	+	916	931	5.89e-05	0.0253	GAGGCGGCGGCGGCGG
MA0472.2	EGR2	HMGCR	chr5:74,632,038-74,633,602	+	533	543	3.36e-05	0.117	CCGCCTCCGCT
MA0472.2	EGR2	HMGCR	chr5:74,632,038-74,633,602	-	1044	1054	6.41e-05	0.117	GCGCCGACGCT
MA0472.2	EGR2	HMGCS1	chr5:43,312,995-43,314,463	+	336	346	4.68e-05	0.117	ACGCCTACGTC
MA0472.2	EGR2	MVD	chr16:88,729,100-88,730,293	-	676	686	4.24e-05	0.117	TCGCCGACGCG
MA0472.2	EGR2	MVD	chr16:88,729,100-88,730,293	-	1040	1050	4.76e-05	0.117	ACGGCCCCGCA
MA0472.2	EGR2	MVD	chr16:88,729,100-88,730,293	-	918	928	5.52e-05	0.117	CGGCCCCCGCA
MA0472.2	EGR2	MVD	chr16:88,729,100-88,730,293	-	1022	1032	5.89e-05	0.117	CCTCCCACACA
MA0472.2	EGR2	MVD	chr16:88,729,100-88,730,293	-	91	101	7.38e-05	0.121	CCGCCCCTGCA
MA0472.2	EGR2	MVK	chr12:110,010,744-110,012,071	+	250	260	2.84e-05	0.117	GCGCCCACGTG

## Sheet: Feuil2
Motif ID	Alt ID	Sequence name	MACS Peaks +/- 500bp	Strand	Motif_Start	Motif_End	p-value	q-value	Matched Sequence
EGR2_HUMAN.H11MO.1.A	EGR2	HMGCR	chr5:74,632,038-74,633,602	+	861	876	1.14e-05	0.0217	GAGCTGTGGGCGGTTG
EGR2_HUMAN.H11MO.1.A	EGR2	HMGCR	chr5:74,632,038-74,633,602	+	1141	1156	1.37e-05	0.0217	GATGGGTGGGAGCGGG
EGR2_HUMAN.H11MO.1.A	EGR2	HMGCR	chr5:74,632,038-74,633,602	+	1143	1158	2.82e-05	0.0217	TGGGTGGGAGCGGGGT
EGR2_HUMAN.H11MO.1.A	EGR2	HMGCR	chr5:74,632,038-74,633,602	+	1112	1127	3.18e-05	0.0217	GGGGCAGGGGCGGCGG
EGR2_HUMAN.H11MO.1.A	EGR2	HMGCR	chr5:74,632,038-74,633,602	-	721	736	4.62e-05	0.025	GCTGCCTAGGCGGAGG
EGR2_HUMAN.H11MO.1.A	EGR2	HMGCR	chr5:74,632,038-74,633,602	-	744	759	4.67e-05	0.025	GCTGTGGGGGCGCACG
EGR2_HUMAN.H11MO.1.A	EGR2	HMGCR	chr5:74,632,038-74,633,602	+	1133	1148	4.78e-05	0.025	GGGGCGGAGATGGGTG
EGR2_HUMAN.H11MO.1.A	EGR2	HMGCR	chr5:74,632,038-74,633,602	+	1107	1122	5.86e-05	0.0253	GAAGAGGGGCAGGGGC
EGR2_HUMAN.H11MO.1.A	EGR2	HMGCR	chr5:74,632,038-74,633,602	-	530	545	8.61e-05	0.0291	GAAGCGGAGGCGGCCA
EGR2_HUMAN.H11MO.1.A	EGR2	HMGCS1	chr5:43,312,995-43,314,463	-	114	129	3.02e-05	0.0217	GGTGAGTGGGGGGTGT
EGR2_HUMAN.H11MO.1.A	EGR2	HMGCS1	chr5:43,312,995-43,314,463	-	98	113	5.74e-05	0.0253	CAGGAGGGGGAGAGAA
EGR2_HUMAN.H11MO.1.A	EGR2	HMGCS1	chr5:43,312,995-43,314,463	-	156	171	5.83e-05	0.0253	GAGGAGTTGGAGGTGC
EGR2_HUMAN.H11MO.1.A	EGR2	HMGCS1	chr5:43,312,995-43,314,463	-	292	307	6.81e-05	0.028	TGAGCGGGGCCGGGCG
EGR2_HUMAN.H11MO.1.A	EGR2	HMGCS1	chr5:43,312,995-43,314,463	-	333	348	8.35e-05	0.0291	AGGACGTAGGCGTGGA
EGR2_HUMAN.H11MO.1.A	EGR2	MVD	chr16:88,729,100-88,730,293	+	1020	1035	1.78e-07	0.00141	GCTGTGTGGGAGGGAG
EGR2_HUMAN.H11MO.1.A	EGR2	MVD	chr16:88,729,100-88,730,293	+	1038	1053	3.02e-05	0.0217	TGTGCGGGGCCGTGGG
EGR2_HUMAN.H11MO.1.A	EGR2	MVD	chr16:88,729,100-88,730,293	-	452	467	8.61e-05	0.0291	CGTGAGGAGGCAGAGG
EGR2_HUMAN.H11MO.1.A	EGR2	MVD	chr16:88,729,100-88,730,293	+	1058	1073	9.64e-05	0.0312	TGTGCGGGGCTGAGGG
EGR2_HUMAN.H11MO.1.A	EGR2	MVK	chr12:110,010,744-110,012,071	-	393	408	2.08e-05	0.0217	GGTGAGTGGCTGGCGG
EGR2_HUMAN.H11MO.1.A	EGR2	MVK	chr12:110,010,744-110,012,071	-	600	615	3.04e-05	0.0217	CAGCTGTGGGTGGAGT
EGR2_HUMAN.H11MO.1.A	EGR2	MVK	chr12:110,010,744-110,012,071	+	907	922	3.12e-05	0.0217	GCGGCCGGGGAGGCGG
EGR2_HUMAN.H11MO.1.A	EGR2	MVK	chr12:110,010,744-110,012,071	-	826	841	3.12e-05	0.0217	GGGGAGGAGGCGTTGT
EGR2_HUMAN.H11MO.1.A	EGR2	MVK	chr12:110,010,744-110,012,071	+	860	875	3.31e-05	0.0217	GGGTTGTGGGAGTTGG
EGR2_HUMAN.H11MO.1.A	EGR2	MVK	chr12:110,010,744-110,012,071	+	913	928	5.53e-05	0.0253	GGGGAGGCGGCGGCGG
EGR2_HUMAN.H11MO.1.A	EGR2	MVK	chr12:110,010,744-110,012,071	+	910	925	5.62e-05	0.0253	GCCGGGGAGGCGGCGG
EGR2_HUMAN.H11MO.1.A	EGR2	MVK	chr12:110,010,744-110,012,071	+	916	931	5.89e-05	0.0253	GAGGCGGCGGCGGCGG
MA0472.2	EGR2	HMGCR	chr5:74,632,038-74,633,602	+	533	543	3.36e-05	0.117	CCGCCTCCGCT
MA0472.2	EGR2	HMGCR	chr5:74,632,038-74,633,602	-	1044	1054	6.41e-05	0.117	GCGCCGACGCT
MA0472.2	EGR2	HMGCS1	chr5:43,312,995-43,314,463	+	336	346	4.68e-05	0.117	ACGCCTACGTC
MA0472.2	EGR2	MVD	chr16:88,729,100-88,730,293	-	676	686	4.24e-05	0.117	TCGCCGACGCG
MA0472.2	EGR2	MVD	chr16:88,729,100-88,730,293	-	1040	1050	4.76e-05	0.117	ACGGCCCCGCA
MA0472.2	EGR2	MVD	chr16:88,729,100-88,730,293	-	918	928	5.52e-05	0.117	CGGCCCCCGCA
MA0472.2	EGR2	MVD	chr16:88,729,100-88,730,293	-	1022	1032	5.89e-05	0.117	CCTCCCACACA
MA0472.2	EGR2	MVD	chr16:88,729,100-88,730,293	-	91	101	7.38e-05	0.121	CCGCCCCTGCA
MA0472.2	EGR2	MVK	chr12:110,010,744-110,012,071	+	250	260	2.84e-05	0.117	GCGCCCACGTG
