# Supplementary material for: Upregulation of the Mevalonate Pathway through EWSR1-FLI1/EGR2 Regulatory Axis Confers Ewing Cells Exquisite Sensitivity to Statins
Source: Cancers (Basel). 2022 May 8;14(9):2327. doi: 10.3390/cancers14092327 (PMC9100622; doi:10.3390/cancers14092327)
Supplement: Supplementary file 1 [file cancers-14-02327-s001.zip › Table S2.xlsx]

## Sheet: Prestwick 24h
Perturbator	Median of replicates R-Zscore
(-) -Levobunolol hydrochloride	0.223422
(-)-Emtricitabine	-1.62377
(-)-Eseroline fumarate salt	-91.3607
(-)-Isoproterenol hydrochloride	0.262427
(-)-MK 801 hydrogen maleate	0.826796
(+) -Levobunolol hydrochloride	0.287698
(+)-Isoproterenol (+)-bitartrate salt	-0.174883
(+,-)-Octopamine hydrochloride	-0.0958334
(+,-)-Synephrine	0.290252
(R) -Naproxen sodium salt	1.06687
(R)-(+)-Atenolol	1.87264
(R)-Duloxetine hydrochloride	-2.86992
(R)-Propranolol hydrochloride	-0.0179384
(S)-(-)-Atenolol	0.325343
(S)-(-)-Cycloserine	0.469791
(S)-propranolol hydrochloride	-0.951923
1,8-Dihydroxy-3-methylanthraquinone	0.677796
2-Aminobenzenesulfonamide	0.987817
3-alpha-Hydroxy-5-beta-androstan-17-one	0.350897
4-aminosalicylic acid	-0.0616804
5-fluorouracil	-4.15701
6-Furfurylaminopurine	-0.874411
Abacavir Sulfate	-0.331574
Acamprosate calcium	0.7113
Acarbose	0.190835
Acebutolol hydrochloride	0.320883
Aceclidine Hydrochloride	0.315724
Aceclofenac	-0.903697
Acefylline	1.1051
Acemetacin	0.0284445
Acenocoumarol	0.825238
Acetaminophen	-0.747533
Acetazolamide	-1.51434
Acetohexamide	0.543805
Acetopromazine maleate salt	-0.531951
Acetylcysteine	0.274272
Acetylsalicylic acid	-0.367108
Acetylsalicylsalicylic acid	-1.59683
Acipimox	0.0853194
Acitretin	0.284212
Actarit	0.314494
Acyclovir	0.917811
Adamantamine fumarate	-0.304344
Adapalene	-18.8634
Adenosine 5'-monophosphate monohydrate	0.429559
Adiphenine hydrochloride	1.63252
Adrenosterone	-0.737161
Albendazole	-35.6756
Alclometasone dipropionate	-0.112524
Alcuronium chloride	-1.09726
Alendronate sodium	1.38571
Alexidine dihydrochloride	-29.1663
Alfacalcidol	-2.18764
Alfadolone acetate	-0.283718
Alfaxalone	0.0980471
Alfuzosin hydrochloride	-0.0725153
Algestone acetophenide	-6.70843
Alizapride hydrochloride	-0.213855
Allantoin	-0.340081
Allopurinol	0.298838
Alosetron hydrochloride	0.226001
Alprenolol hydrochloride	1.41876
Alprostadil	0.274576
Althiazide	0.0694915
Altrenogest	-0.544644
Altretamine	0.561303
Alverine citrate salt	-0.331343
Ambrisentan	0.0597658
Ambroxol hydrochloride	0.178398
Amcinonide	-11.4782
Amethopterin (R,S)	-7.2129
Amfepramone hydrochloride	-0.613392
Amidopyrine	0.56912
Amifostine	-0.0141083
Amikacin hydrate	0.700736
Amiloride hydrochloride dihydrate	-0.208462
Aminacrine	-21.3006
Aminocaproic acid	-1.69042
Aminohippuric acid	-0.0091664
Aminophylline	0.0402743
Aminopurine, 6-benzyl	0.0768203
Amiodarone hydrochloride	-2.55501
Amiprilose hydrochloride	0.456585
Amisulpride	-0.102189
Amitryptiline hydrochloride	0.32611
Amlexanox	0.724231
Amlodipine	-4.3779
Amodiaquin dihydrochloride dihydrate	-6.01219
Amorolfine hydrochloride	0.562346
Amoxapine	-0.42268
Amoxicillin	0.403931
Amphotericin B	0.626249
Ampicillin trihydrate	-0.00904374
Ampiroxicam	-0.0498455
Amprolium hydrochloride	-0.0048693
Ampyrone	0.0378949
Amrinone	-3.07353
Amyleine hydrochloride	0.281861
Anagrelide	0.50413
Anastrozole	-0.355443
Androsterone	0.416488
Anethole-trithione	-0.634637
Aniracetam	0.0901368
Antazoline hydrochloride	-0.451704
Anthralin	0.757903
Antimycin A	-3.99796
Antipyrine	-0.00566962
Antipyrine, 4-hydroxy	0.474382
Apramycin	0.345451
Aprepitant	-10.0607
Arbutin	0.441906
Argatroban	0.96645
Aripiprazole	-4.47041
Artemisinin	-0.700593
Articaine hydrochloride	-0.451628
Ascorbic acid	-2.13737
Asenapine maleate	-1.30758
Astemizole	-58.3434
Atorvastatin	-3.30851
Atovaquone	-0.332761
Atracurium besylate	-0.428882
Atropine sulfate monohydrate	-0.124798
Auranofin	-26.57
Avermectin B1	-6.42523
Avobenzone	-1.51304
Azacyclonol	-2.64248
Azacytidine-5	-13.8394
Azaguanine-8	-7.27208
Azaperone	-0.0200026
Azapropazone	-0.891744
Azatadine maleate	-0.649443
Azathioprine	-0.221402
Azelastine hydrochloride	-1.66123
Azithromycin	-0.639562
Azlocillin sodium salt	0.823921
Aztreonam	-0.0927083
Bacampicillin hydrochloride	-0.519555
Bacitracin	-0.293902
Baclofen (R,S)	0.299265
Balsalazide Sodium	0.825857
Bambuterol hydrochloride	-0.184203
Beclomethasone dipropionate	0.111555
Bemegride	-0.696908
Benazepril hydrochloride	0.496437
Bendroflumethiazide	-0.011532
Benfluorex	0.115773
Benfotiamine	0.0298503
Benidipine hydrochloride	-1.0232
Benoxinate hydrochloride	0.328364
Benperidol	-0.0595488
Benserazide hydrochloride	-48.7718
Benzamil hydrochloride	-0.524851
Benzathine benzylpenicillin	0.0232277
Benzbromarone	0.257555
Benzethonium chloride	-39.8443
Benzocaine	0.836265
Benzonatate	-2.57355
Benzoxiquine	-14.4484
Benzthiazide	0.0215082
Benztropine mesylate	0.173392
Benzydamine hydrochloride	-0.557815
Benzylpenicillin sodium	0.779706
Bephenium hydroxynaphthoate	0.0525738
Bepridil hydrochloride	-2.2032
Besifloxacin hydrochloride	-1.17124
Beta-Escin	-6.2646
Betahistine mesylate	0.651218
Betamethasone	-0.375419
Betaxolol hydrochloride	0.0386123
Betazole hydrochloride	-0.223613
Bethanechol chloride	0.100314
Bezafibrate	0.122996
Bicalutamide	-0.566728
Bifonazole	-0.562147
Biotin	0.434001
Biperiden hydrochloride	0.0279197
Bisacodyl	-1.02896
Bisoprolol fumarate	0.0816941
Bosentan	0.399748
Bretylium tosylate	0.952352
Brimonidine L-Tartrate	1.13977
Brinzolamide	0.560801
Bromhexine hydrochloride	0.904492
Bromocryptine mesylate	-1.00362
Bromopride	0.0991173
Bromperidol	-1.19961
Brompheniramine maleate	-0.835515
Bucladesine sodium salt	0.229189
Budesonide	0.701626
Bufexamac	-4.03686
Buflomedil hydrochloride	1.66576
Bumetanide	-0.142486
Bupivacaine hydrochloride	0.258618
Bupropion hydrochloride	-0.0519976
Buspirone hydrochloride	1.41136
Busulfan	0.68838
Butacaine	0.239489
Butalbital	0.288281
Butamben	0.755942
Butenafine Hydrochloride	0.0205607
Butoconazole nitrate	-10.6152
Butylparaben	-0.242195
Butylscopolammonium (n-) bromide	0.435605
Caffeine	0.950276
Camptothecine (S,+)	-21.5845
Camylofine chlorhydrate	0.286454
Candesartan	0.295158
Canrenoic acid potassium salt	0.900211
Canrenone	-0.422104
Captopril	-2.44964
Carbachol	-2.15635
Carbadox	0.164093
Carbamazepine	-0.041401
Carbarsone	0.474987
Carbenoxolone disodium salt	-0.150315
Carbetapentane citrate	0.298311
Carbidopa	-6.18887
Carbimazole	0.377663
Carbinoxamine maleate salt	-0.115937
Carisoprodol	0.596134
Carmofur	-5.87677
Carprofen	0.663526
Carteolol hydrochloride	1.15703
Carvedilol	-1.83495
Catharanthine	-0.556541
Cefaclor hydrate	-0.45078
Cefadroxil	-0.289758
Cefazolin sodium salt	0.742282
Cefdinir	0.462573
Cefepime hydrochloride	-0.0286878
Cefixime	0.0619689
Cefmetazole sodium salt	0.111068
Cefoperazone dihydrate	0.350687
Ceforanide	0.892106
Cefotaxime sodium salt	0.211253
Cefotetan	-0.242276
Cefotiam hydrochloride	0.19557
Cefoxitin sodium salt	-0.112262
Cefpiramide	0.28089
Cefpodoxime proxetil	0.163757
Cefprozil	-1.39978
Cefsulodin sodium salt	0.439625
Ceftazidime pentahydrate	0.761033
Ceftibuten	0.68725
Cefuroxime axetil	0.019608
Cefuroxime sodium salt	-1.64257
Celecoxib	0.144726
Celiprolol hydrochloride	1.02149
Cephalosporanic acid, 7-amino	-0.00858197
Cephalothin sodium salt	0.260885
Cetirizine dihydrochloride	0.170167
Chenodiol	-0.164738
Chicago sky blue 6B	0.794229
Chloramphenicol	-0.957949
Chlorcyclizine hydrochloride	-0.153103
Chlorhexidine	-57.0325
Chlormadinone acetate	-1.0356
Chlormezanone	0.676029
Chloropyramine hydrochloride	-0.171787
Chloroquine diphosphate	-1.0038
Chlorothiazide	-0.109009
Chlorotrianisene	0.420662
Chloroxine	-47.9477
Chlorpheniramine maleate	0.386059
Chlorphensin carbamate	-0.325725
Chlorpromazine hydrochloride	-28.0262
Chlorpropamide	-0.909243
Chlorprothixene hydrochloride	-3.46726
Chlortetracycline hydrochloride	0.862585
Chlorthalidone	-0.147503
Chlorzoxazone	-1.06699
Ciclesonide	-2.43003
Ciclopirox ethanolamine	-11.2637
Cilnidipine	-5.49628
Cilostazol	0.792524
Cimetidine	0.177772
Cinnarizine	0.368415
Cinoxacin	0.232113
Ciprofibrate	0.911943
Ciprofloxacin hydrochloride monohydrate	1.32313
Cisapride	-1.04738
Cisatracurium besylate	0.180792
Citalopram Hydrobromide	0.724048
Cladribine	-16.9087
Clarithromycin	0.847969
Clavulanate potassium salt	0.357135
Clebopride maleate	-0.335254
Clemastine fumarate	-4.45945
Clemizole hydrochloride	0.692874
Clenbuterol hydrochloride	0.415394
Clidinium bromide	0.20321
Clinafloxacin	0.905316
Clindamycin hydrochloride	-0.162055
Clioquinol	-42.2764
Clobetasol propionate	-0.986796
Clobutinol hydrochloride	0.00996239
Clocortolone pivalate	-0.496668
Clofazimine	-6.18343
Clofibrate	0.947998
Clofibric acid	-0.15496
Clofilium tosylate	-31.4746
Clomiphene citrate (Z,E)	-10.7459
Clomipramine hydrochloride	-2.51255
Clonidine hydrochloride	-0.151152
Clonixin Lysinate	1.13336
Clopamide	0.478012
Cloperastine hydrochloride	-0.356987
Clopidogrel	-0.11478
Clorgyline hydrochloride	-0.164063
Clorsulon	1.14575
Closantel	-1.69807
Clotrimazole	-26.7397
Cloxacillin sodium salt	-0.143585
Clozapine	-0.0205888
Colchicine	-37.6114
Colistin sulfate	0.880941
Corticosterone	0.179083
Cortisol acetate	-0.114566
Cortisone	0.768012
Cromolyn disodium salt	-0.494746
Crotamiton	0.918441
Cyanocobalamin	0.256422
Cyclizine hydrochloride	-0.224348
Cyclobenzaprine hydrochloride	-0.387398
Cycloheximide	-17.4749
Cyclopenthiazide	-0.0969997
Cyclopentolate hydrochloride	-0.00724536
Cyclophosphamide	0.27297
Cyclosporin A	-3.05314
Cyproheptadine hydrochloride	0.14746
Cyproterone acetate	-1.42995
Cytarabine	-17.2101
D,L-Penicillamine	0.295874
Dacarbazine	0.315683
Danazol	0.179048
Dantrolene sodium salt	-0.685558
Dapsone	0.340619
Darifenacin hydrobromide	-0.521664
Darunavir	1.05309
Daunorubicin hydrochloride	-60.2449
D-cycloserine	1.224
Debrisoquin sulfate	0.126172
Decamethonium bromide	0.272169
Deferoxamine mesylate	-2.24204
Deflazacort	-0.179328
Dehydrocholic acid	0.185643
Dehydroisoandosterone 3-acetate	-0.0105782
Delavirdine	-0.183263
Demecarium bromide	-1.24567
Demeclocycline hydrochloride	-0.18561
Denatonium benzoate	-0.150292
Deoxycorticosterone	-0.368415
Deptropine citrate	-2.62447
Dequalinium dichloride	-35.6905
Desipramine hydrochloride	0.264181
Desloratadine	0.00149448
Desonide	-1.04165
Dexamethasone acetate	0.889571
Dexfenfluramine hydrochloride	1.79535
Dextromethorphan hydrobromide monohydrate	0.00950268
Diacerein	-0.0547173
Diatrizoic acid dihydrate	0.133416
Diazoxide	-0.00340859
Dibenzepine hydrochloride	0.210458
Dibucaine	0.287716
Dichlorphenamide	-0.0324148
Diclazuril	0.618489
Diclofenac sodium	-0.227976
Dicloxacillin sodium salt hydrate	-0.513648
Dicumarol	-0.356256
Dicyclomine hydrochloride	0.539558
Didanosine	0.925935
Dienestrol	-1.3305
Diethylcarbamazine citrate	0.5793
Diethylstilbestrol	-11.0594
Diflorasone Diacetate	-0.124916
Diflunisal	0.296755
Digitoxigenin	-16.4456
Digoxigenin	-17.7872
Digoxin	-22.8749
Dihydroergotamine tartrate	0.598837
Dihydrostreptomycin sulfate	-0.78221
Dilazep dihydrochloride	-1.37286
Diloxanide furoate	1.00328
Diltiazem hydrochloride	0.405626
Dimaprit dihydrochloride	0.81057
Dimenhydrinate	-0.325784
Dimethadione	-0.0174906
Dimethisoquin hydrochloride	-0.418805
Dinoprost trometamol	0.20471
Diosmin	0.443564
Dioxybenzone	-0.37963
Diperodon hydrochloride	-0.434253
Diphemanil methylsulfate	-0.656794
Diphenhydramine hydrochloride	0.212573
Diphenidol hydrochloride	0.137549
Diphenylpyraline hydrochloride	1.1433
Dipivefrin hydrochloride	0.966104
Diprophylline	-0.103399
Dipyridamole	0.545787
Dipyrone	1.24228
Dirithromycin	1.63217
Disopyramide	0.508307
Disulfiram	-4.54333
Dizocilpine maleate	0.711328
DO 897/99	-0.960838
Dobutamine hydrochloride	-1.0039
Docetaxel	-26.8388
Dofetilide	0.144213
Dolasetron mesilate	-0.667542
Domperidone	0.282819
Donepezil hydrochloride	-0.0233941
Dopamine hydrochloride	-0.167859
Dorzolamide hydrochloride	-1.13652
Dosulepin hydrochloride	-2.15742
Doxapram hydrochloride	0.173576
Doxazosin mesylate	-0.363289
Doxepin hydrochloride	0.904967
Doxofylline	1.10349
Doxorubicin hydrochloride	-63.5652
Doxycycline hydrochloride	-1.76689
Doxylamine succinate	-0.0965816
Drofenine hydrochloride	-1.49079
Droperidol	-0.148819
Dropropizine (R,S)	0.513757
Dyclonine hydrochloride	-0.433588
Dydrogesterone	-0.430309
Ebselen	-1.25459
Eburnamonine (-)	-37.6178
Econazole nitrate	-1.96891
Edrophonium chloride	-1.42966
Efavirenz	-0.331495
Emedastine	-0.37157
Enalapril maleate	1.82798
Enalaprilat dihydrate	0.327249
Enilconazole	-2.63875
Enoxacin	0.475143
Enrofloxacin	1.15453
Entacapone	0.782905
Epiandrosterone	0.821139
Epirizole	-0.251367
Epirubicin hydrochloride	-34.3084
Equilin	0.318713
Erlotinib	-1.27496
Erythromycin	0.760704
Escitalopram oxalate	0.290105
Eserine hemisulfate salt	0.539538
Esmolol hydrochloride	-0.23544
Estradiol Valerate	-0.728788
Estradiol-17 beta	-1.80475
Estramustine	-18.9824
Estriol	0.326149
Estrone	0.363345
Estropipate	0.00705157
Etanidazole	0.427898
Ethacrynic acid	-1.04638
Ethambutol dihydrochloride	0.611221
Ethamivan	-0.136427
Ethamsylate	1.53419
Ethaverine hydrochloride	-2.67497
Ethinylestradiol	-20.9283
Ethionamide	0.428852
Ethisterone	-0.786851
Ethopropazine hydrochloride	0.0618946
Ethosuximide	-0.6711
Ethotoin	0.116379
Ethoxyquin	0.178609
Ethoxzolamide	-0.649286
Ethynodiol diacetate	-1.59523
Ethynylestradiol 3-methyl ether	0.66664
Etifenin	0.38118
Etilefrine hydrochloride	0.020762
Etodolac	1.3907
Etofenamate	-0.298066
Etofylline	0.469404
Etomidate	0.8455
Etoposide	-24.6761
Etoricoxib	-1.56642
Etretinate	-1.59265
Eucatropine hydrochloride	0.961849
Exemestane	-1.54016
Ezetimibe	0.413851
Famciclovir	1.29562
Famotidine	0.587396
Famprofazone	-0.240749
Felbamate	0.0381479
Felbinac	1.32582
Felodipine	1.17689
Fenbendazole	-26.3935
Fenbufen	0.786014
Fendiline hydrochloride	-11.3575
Fenipentol	-0.242138
Fenofibrate	0.00384424
Fenoldopam	0.352112
Fenoprofen calcium salt dihydrate	0.226241
Fenoterol hydrobromide	0.267353
Fenspiride hydrochloride	1.01416
Fentiazac	1.46043
Fexofenadine hydrochloride	0.197981
Finasteride	0.681841
Fipexide hydrochloride	-0.201682
Flavoxate hydrochloride	0.420024
Flecainide acetate	0.573773
Fleroxacin	-0.748443
Florfenicol	1.10734
Floxuridine	-6.92903
Flubendazol	-34.5871
Flucloxacillin sodium	-0.468982
Fluconazole	-0.00446054
Flucytosine	0.00280687
Fludarabine	-0.517686
Fludrocortisone acetate	0.617872
Flufenamic acid	1.03223
Flumequine	-0.0167334
Flumethasone	-0.719475
Flumethasone pivalate	0.333527
Flunarizine dihydrochloride	-0.192704
Flunisolide	-1.80104
Flunixin meglumine	0.444362
Fluocinolone acetonide	0.166475
Fluocinonide	0.42447
Fluorometholone	-0.659832
Fluoxetine hydrochloride	-1.88839
Fluphenazine dihydrochloride	-13.7421
Flurandrenolide	0.112465
Flurbiprofen	0.696587
Fluspirilen	-13.3288
Flutamide	-0.725617
Fluticasone propionate	-2.69732
Fluvastatin sodium salt	-2.62535
Fluvoxamine maleate	-0.307834
Folic acid	0.526153
Folinic acid calcium salt	-0.0444926
Fomepizole	0.0985939
Formestane	0.690519
Formoterol fumarate	2.00356
Fosfosal	0.364511
Fosinopril	1.14652
Fulvestrant	0.458591
Furaltadone hydrochloride	-0.394689
Furazolidone	-0.481356
Furosemide	-0.448305
Fursultiamine Hydrochloride	1.04703
Fusidic acid sodium salt	0.79539
Gabapentin	1.18953
Gabazine bromide	-0.804278
Gabexate mesilate	-0.162761
Galanthamine hydrobromide	0.576418
Gallamine triethiodide	0.391231
Ganciclovir	0.0287528
Gatifloxacin	1.31633
GBR 12909 dihydrochloride	-4.21775
Gefitinib	-3.35322
Gemcitabine	-15.4572
Gemfibrozil	0.229591
Gentamicine sulfate	-1.72227
Gestrinone	-0.0313213
Glafenine hydrochloride	0.0971059
Glibenclamide	-1.28111
Gliclazide	0.704705
Glimepiride	0.373485
Glipizide	-0.433557
Gliquidone	-0.328151
Glutethimide, para-amino	-0.163161
Glycopyrrolate	1.07802
Granisetron	0.85915
Grepafloxacin	-0.611805
Griseofulvin	-9.67607
Guaiacol	-0.0370041
Guaifenesin	0.692728
Guanabenz acetate	-1.97569
Guanadrel sulfate	0.129443
Guanethidine sulfate	0.525961
Guanfacine hydrochloride	-0.764656
Halcinonide	0.275945
Halofantrine hydrochloride	-0.783499
Haloperidol	-0.304159
Haloprogin	-30.4004
Hemicholinium bromide	0.722455
Heptaminol hydrochloride	-3.97147
Hesperidin	-3.40523
Hexachlorophene	-22.3398
Hexamethonium dibromide dihydrate	0.466087
Hexestrol	-0.318246
Hexetidine	-73.2843
Hexylcaine hydrochloride	0.556959
Histamine dihydrochloride	-1.26983
Homatropine hydrobromide (R,S)	0.522414
Homochlorcyclizine dihydrochloride	-7.85635
Homosalate	-0.186686
Homoveratrylamine	0.788289
Hycanthone	-13.1493
Hydralazine hydrochloride	0.217445
Hydrochlorothiazide	-0.436746
Hydrocortisone base	0.233887
Hydroflumethiazide	0.54599
Hydroxychloroquine sulfate	-0.0290311
Hydroxytacrine maleate (R,S)	-0.184534
Hydroxyzine dihydrochloride	-0.293501
Hymecromone	0.568015
Hyoscyamine (L)	0.827048
Ibandronate sodium	0.15134
Ibudilast	0.330641
Ibutilide fumarate	0.819085
Idazoxan hydrochloride	-0.363467
Idebenone	-2.90955
Idoxuridine	-0.560698
Ifenprodil tartrate	0.748352
Ifosfamide	0.0964621
Imatinib	0.398149
Imidurea	0.206841
Imipenem	0.552188
Imipramine hydrochloride	1.02102
Imiquimod	-1.03936
Indapamide	-0.558678
Indatraline hydrochloride	-41.4164
Indinavir sulfate	-0.156369
Indomethacin	0.492624
Indoprofen	0.809831
Iobenguane sulfate	1.23434
Iocetamic acid	0.92694
Iodipamide	0.955381
Iodixanol	0.788269
Iohexol	-0.739609
Iopamidol	0.931663
Iopanoic acid	0.207488
Iopromide	-0.89738
Ioversol	-0.295676
Ioxaglic acid	0.802203
Ipriflavone	0.289885
Iproniazide phosphate	0.488124
Ipsapirone	0.63224
Irbesartan	-0.0600508
Irinotecan hydrochloride trihydrate	-21.8481
Irsogladine maleate	0.149203
Isocarboxazid	-0.140013
Isoconazole	-3.10721
Isoetharine mesylate salt	-0.567135
Isoflupredone acetate	0.171374
Isometheptene mucate	-0.234708
Isoniazid	0.399421
Isopropamide iodide	0.5557
Isopyrin hydrochloride	0.415794
Isosorbide dinitrate	0.553737
Isosorbide mononitrate	-0.62596
Isotretinoin	0.670516
Isoxicam	-0.367773
Isoxsuprine hydrochloride	0.99445
Isradipine	0.469065
Itopride	0.674378
Itraconazole	-0.33827
Ivermectin	-40.0742
Josamycin	1.21504
Kanamycin A sulfate	0.457668
Ketanserin tartrate hydrate	1.26571
Ketoconazole	-2.84968
Ketoprofen	0.70167
Ketorolac tromethamine	0.083777
Ketotifen fumarate	-0.603372
Khellin	-2.58779
L(-)-vesamicol hydrochloride	-0.0772285
Labetalol hydrochloride	-0.187574
Lacidipine	-2.70946
Lamivudine	-1.61339
Lamotrigine	0.530705
Lanatoside C	-19.721
Lansoprazole	0.0932483
Latanoprost	0.324442
Leflunomide	0.974562
Letrozole	1.02015
Levalbuterol hydrochloride	-0.211833
Levamisole hydrochloride	0.468353
Levetiracetam	0.066398
Levocabastine hydrochloride	-0.216948
Levodopa	-3.04832
Levonordefrin	-0.0804347
Levopropoxyphene napsylate	0.852964
Lidocaine hydrochloride	0.677971
Lidoflazine	-3.78039
Lincomycin hydrochloride	0.702647
Linezolid	0.885425
Liothyronine	0.594482
Liranaftate	0.561787
Lisinopril	0.799558
Lithocholic acid	-1.65725
Lodoxamide	0.923287
Lofepramine	-0.363871
Lofexidine	0.402998
Lomefloxacin hydrochloride	-0.783294
Lomerizine hydrochloride	-4.58501
Loperamide hydrochloride	-1.31373
Loracarbef	-1.31272
Loratadine	-1.3823
Lorglumide sodium salt	0.555629
Losartan	0.579542
Loteprednol etabonate	0.027745
Lovastatin	-3.31533
Loxapine succinate	-0.485141
Luteolin	-10.3714
Lymecycline	0.412768
Lynestrenol	-5.35693
Mafenide hydrochloride	0.0792414
Maprotiline hydrochloride	-1.99275
Mebendazole	-32.153
Mebeverine hydrochloride	0.114784
Mebhydroline 1,5-naphtalenedisulfonate	0.734096
Mecamylamine hydrochloride	0.986985
Meclocycline sulfosalicylate	0.20022
Meclofenamic acid sodium salt monohydrate	-0.0628462
Meclofenoxate hydrochloride	0.0208171
Meclozine dihydrochloride	-0.71309
Medrysone	1.68309
Mefenamic acid	-0.104127
Mefexamide hydrochloride	0.316098
Mefloquine hydrochloride	-62.6958
Megestrol acetate	-3.34686
Meglumine	0.284209
Melatonin	0.607986
Melengestrol acetate	-0.601549
Meloxicam	0.975177
Memantine Hydrochloride	0.641539
Mepenzolate bromide	0.458466
Mephenesin	-0.325208
Mephentermine hemisulfate	1.03887
Mephenytoin	1.30244
Mepivacaine hydrochloride	0.56129
Meprylcaine hydrochloride	0.613193
Meptazinol hydrochloride	-0.651219
Merbromin	0.856404
Mercaptopurine	0.802001
Meropenem	-0.803383
Mesalamine	-0.242111
Mesna	0.610379
Mesoridazine besylate	-0.132417
Metaproterenol sulfate, orciprenaline sulfate	0.707639
Metaraminol bitartrate	0.201147
Metergoline	-4.94165
Metformin hydrochloride	-0.173022
Methacholine chloride	0.644733
Methacycline hydrochloride	0.214616
Methantheline bromide	0.762918
Methapyrilene hydrochloride	0.967053
Methazolamide	-0.287809
Methenamine	0.662779
Methiazole	-36.8439
Methicillin sodium	0.0128352
Methimazole	0.103797
Methiothepin maleate	-17.0439
Methocarbamol	-0.529019
Methotrexate	-7.34835
Methotrimeprazine maleat salt	-1.11327
Methoxamine hydrochloride	0.635545
Methyl benzethonium chloride	-63.0289
Methylatropine nitrate	0.330787
Methyldopa (L,-)	0.300772
Methyldopate hydrochloride	-0.986174
Methylergometrine maleate	0.562154
Methylhydantoin-5-(D)	0.595886
Methylhydantoin-5-(L)	0.514168
Methylprednisolone, 6-alpha	0.290682
Meticrane	0.928299
Metixene hydrochloride	-3.78323
Metoclopramide monohydrochloride	-0.130361
Metolazone	1.01996
Metoprolol-(+,-) (+)-tartrate salt	0.299282
Metrizamide	-0.181475
Metronidazole	0.340027
Metyrapone	0.291867
Mevalonic-D, L acid lactone	-0.449019
Mevastatin	-4.4854
Mexiletine hydrochloride	0.626178
Mianserine hydrochloride	-4.21956
Miconazole	-4.28862
Midodrine hydrochloride	0.104388
Mifepristone	0.154511
Miglitol	0.748621
Milnacipran hydrochloride	-2.72247
Milrinone	1.72662
Minaprine dihydrochloride	0.664791
Minocycline hydrochloride	-0.479683
Minoxidil	-0.312952
Mirabegron	-0.750654
Mirtazapine	-0.240604
Misoprostol	-1.10606
Mitotane	-0.75326
Mitoxantrone dihydrochloride	-71.8472
Mizolastine	-0.249145
Moclobemide	-0.0520385
Modafinil	-2.15414
Molindone hydrochloride	1.05924
Molsidomine	1.01304
Mometasone furoate	-7.71979
Monensin sodium salt	-9.39373
Monobenzone	-11.3148
Montelukast	-0.400842
Morantel tartrate	0.812103
Moricizine hydrochloride	0.6351
Moroxidine hydrochloride	-0.0256757
Moxalactam disodium salt	-0.0177651
Moxifloxacin	0.726487
Moxisylyte hydrochoride	-0.298379
Moxonidine	0.597261
Mupirocin	-0.266687
N6-methyladenosine	-2.07741
Nabumetone	0.4311
N-Acetyl-DL-homocysteine Thiolactone	0.0497683
N-Acetyl-L-leucine	0.725312
Nadide	0.582229
Nadifloxacin	-1.98776
Nadolol	0.0462631
Nafcillin sodium salt monohydrate	0.403093
Nafronyl oxalate	0.356393
Naftifine hydrochloride	0.704061
Naftopidil dihydrochloride	-0.697709
Nalbuphine hydrochloride	0.356687
Nalidixic acid sodium salt	-0.391047
Nalmefene hydrochloride	1.00377
Naloxone hydrochloride	0.100457
Naltrexone hydrochloride dihydrate	0.134703
Nandrolone	0.415737
Naphazoline hydrochloride	0.118808
Naproxen	1.02337
Nateglinide	0.534795
Nefazodone hydrochloride	-0.958129
Nefopam hydrochloride	0.20746
Nelarabine	-0.165247
Nelfinavir mesylate	-6.08372
Neomycin sulfate	1.28815
Neostigmine bromide	0.322259
Nevirapine	-0.2178
Niacin	0.578178
Nialamide	0.976398
Nicardipine hydrochloride	-0.795245
Nicergoline	0.549566
Niclosamide	-18.183
Nicorandil	0.80176
Nicotinamide	0.548889
Nifedipine	-1.03937
Nifekalant	0.589139
Nifenazone	-0.196571
Niflumic acid	0.0526239
Nifuroxazide	-20.0055
Nifurtimox	0.552843
Nilutamide	-0.0203546
Nilvadipine	-0.401575
Nimesulide	-0.25473
Nimodipine	0.438691
Niridazole	-0.42
Nisoldipine	-3.84732
Nisoxetine hydrochloride	-0.183717
Nitazoxanide	-0.599807
Nitrendipine	0.280807
Nitrocaramiphen hydrochloride	-0.0618583
Nitrofural	-0.416192
Nitrofurantoin	1.85284
Nizatidine	-0.169109
Nocodazole	-30.308
Nomegestrol acetate	0.528488
Nomifensine maleate	-0.123529
Norcyclobenzaprine	-0.532413
Norethindrone	0.278556
Norethynodrel	-0.493374
Norfloxacin	0.0586766
Norgestimate	-1.57858
Norgestrel-(-)-D	-1.16695
Nortriptyline hydrochloride	-2.29569
Novobiocin sodium salt	-0.171424
Nylidrin	-0.148208
Nystatine	-0.517645
Ofloxacin	1.85872
Olanzapine	0.878614
Olmesartan	1.03989
Olopatadine hydrochloride	-0.169907
Omeprazole	0.792022
Ondansetron Hydrochloride	0.26267
Opipramol dihydrochloride	0.705908
Ornidazole	-0.23018
Orphenadrine hydrochloride	-0.165109
Oxacillin sodium	0.928759
Oxalamine citrate salt	-1.14938
Oxandrolone	-0.0774108
Oxantel pamoate	0.468919
Oxaprozin	0.438019
Oxcarbazepine	-0.00466018
Oxethazaine	-6.53742
Oxfendazol	-20.8161
Oxibendazol	-33.3072
Oxiconazole Nitrate	-1.63556
Oxolinic acid	-0.172201
Oxprenolol hydrochloride	0.194974
Oxybenzone	0.0573986
Oxybutynin chloride	-0.805641
Oxymetazoline hydrochloride	1.49355
Oxymetholone	-2.44411
Oxyphenbutazone	0.412013
Oxytetracycline dihydrate	0.805796
Ozagrel hydrochloride	-0.0792841
Paclitaxel	-42.4774
Palonosetron hydrochloride	-1.19624
Pancuronium bromide	0.246067
Panthenol (D)	-0.426147
Pantoprazole sodium	-0.529725
Papaverine hydrochloride	-2.69907
Parbendazole	-35.8138
Pargyline hydrochloride	0.780103
Paromomycin sulfate	0.705176
Paroxetine Hydrochloride	-7.66483
Parthenolide	-40.0334
Pefloxacine	-0.00196079
Pemetrexed disodium	-3.7985
Pemirolast potassium	0.848333
Pempidine tartrate	-0.439491
Penbutolol sulfate	-3.32098
Penciclovir	-0.506863
Pentamidine isethionate	0.414085
Pentetic acid	0.616053
Pentobarbital	0.300651
Pentolinium bitartrate	0.324694
Pentoxifylline	-0.0410499
Pentylenetetrazole	0.371747
Pepstatin A	0.515755
Pergolide mesylate	-0.354351
Perhexiline maleate	-75.2818
Perindopril	0.739174
Perospirone	-1.18637
Perphenazine	-13.5879
Phenacetin	0.705336
Phenazopyridine hydrochloride	-0.356769
Phenelzine sulfate	-0.144783
Phenethicillin potassium salt	-1.62416
Phenformin hydrochloride	-0.356701
Phenindione	0.656828
Pheniramine maleate	-0.0452925
Phenothiazine	-1.31569
Phenoxybenzamine hydrochloride	-1.50645
Phenprobamate	0.393929
Phensuximide	-0.901217
Phentermine hydrochloride	-0.44249
Phentolamine hydrochloride	0.177393
Phenylbutazone	1.22871
Phenylpropanolamine hydrochloride	0.819353
Phthalylsulfathiazole	-1.00832
Picotamide monohydrate	0.614185
Picrotoxinin	0.0542806
Pidotimod	0.288894
Pilocarpine nitrate	1.23116
Pimethixene maleate	-1.32529
Pimozide	-14.0859
Pinacidil	0.561078
Pinaverium bromide	-8.52977
Pindolol	0.696404
Pioglitazone	1.41601
Pipemidic acid	-0.220724
Pipenzolate bromide	-0.154055
Piperacetazine	-1.26007
Piperacillin sodium salt	0.00126874
Piperidolate hydrochloride	-0.544003
Piracetam	0.392694
Pirenperone	0.394782
Pirenzepine dihydrochloride	0.718072
Piretanide	0.177868
Piribedil hydrochloride	-3.06091
Pirlindole mesylate	0.428657
Piromidic acid	-0.238729
Piroxicam	1.18606
Pivampicillin	0.517108
Pivmecillinam hydrochloride	-0.419582
Pizotifen malate	-0.434436
Podophyllotoxin	-34.8411
Practolol	1.41652
Pralidoxime chloride	0.208648
Pramipexole dihydrochloride	-0.6255
Pramoxine hydrochloride	-0.712439
Pranlukast	-0.431086
Pranoprofen	0.178765
Pravastatin	-0.348554
Praziquantel	0.70923
Prazosin hydrochloride	-9.64721
Prednicarbate	-0.581639
Prednisolone	-0.442256
Prednisone	0.758925
Pregabalin	0.21122
Pregnenolone	0.756221
Prenylamine lactate	-19.3554
Pridinol methanesulfonate salt	-1.14383
Prilocaine hydrochloride	-0.725518
Primaquine diphosphate	-2.13431
Primidone	1.02708
Proadifen hydrochloride	-0.545404
Probenecid	0.731898
Probucol	-0.0613673
Procainamide hydrochloride	0.797512
Procaine hydrochloride	-0.150199
Procarbazine hydrochloride	-0.477409
Prochlorperazine dimaleate	-24.9573
Procyclidine hydrochloride	-0.76561
Progesterone	-9.3648
Proglumide	-1.70171
Proguanil hydrochloride	0.254327
Promazine hydrochloride	-1.00668
Promethazine hydrochloride	0.494822
Pronethalol hydrochloride	-0.0338966
Propafenone hydrochloride	-0.187482
Propantheline bromide	0.371132
Proparacaine hydrochloride	-0.750344
Propidium iodide	0.757428
Propofol	0.105737
Propoxycaine hydrochloride	0.359668
Propylthiouracil	0.424057
Proscillaridin A	-21.0199
Prothionamide	0.0530398
Protriptyline hydrochloride	-1.03909
Pyrantel tartrate	0.402668
Pyrazinamide	-0.16959
Pyridostigmine iodide	-1.11996
Pyridoxine hydrochloride	0.0393771
Pyrilamine maleate	0.557203
Pyrimethamine	-4.55849
Pyrithyldione	-1.49302
Pyrvinium pamoate	-33.52
Quetiapine hemifumarate	0.00326221
Quinacrine dihydrochloride hydrate	-40.4244
Quinapril hydrochloride	-0.183303
Quinethazone	0.375337
Quinidine hydrochloride monohydrate	0.379824
Quipazine dimaleate salt	0.152223
R(-) Apomorphine hydrochloride hemihydrate	-12.9691
Rabeprazole Sodium salt	0.179513
Racecadotril	-0.129566
Racepinephrine hydrochloride	-0.0506928
Raclopride	-1.82277
Raloxifene hydrochloride	-15.0105
Raltitrexed	-7.16909
Ramipril	0.184016
Ranitidine hydrochloride	-0.517949
Ranolazine	0.00781435
Rasagiline	0.128605
Rebamipide	0.216673
Reboxetine mesylate	0.1074
Remoxipride Hydrochloride	0.191502
Repaglinide	1.46253
Reserpine	-3.62078
Retinoic acid	-0.903738
Ribavirin	0.200642
Ribostamycin sulfate salt	1.22362
Rifabutin	-1.71558
Rifampicin	0.65028
Rifapentine	0.428665
Rifaximin	0.434222
Riluzole hydrochloride	-1.34159
Rimantadine Hydrochloride	0.704291
Rimexolone	-2.57467
Risedronic acid monohydrate	1.4879
Risperidone	-0.979561
Ritodrine hydrochloride	0.685641
Ritonavir	1.08541
Rivastigmine	0.418732
Rizatriptan benzoate	0.89912
Rofecoxib	-1.14218
Rolipram	-0.20262
Ronidazole	-0.83301
Ropinirole hydrochloride	0.539394
Rosiglitazone Hydrochloride	0.283782
Roxatidine Acetate hydrochloride	0.390655
Roxithromycin	0.452733
Rufloxacin	-0.16174
S(-)Eticlopride hydrochloride	-0.223216
S-(+)-ibuprofen	0.413304
Salbutamol	-0.258854
Salmeterol	-1.18242
Saquinavir mesylate	0.85058
Sarafloxacin	-0.529963
Scopolamine hydrochloride	0.988959
Scopolamin-N-oxide hydrobromide	-0.0890851
Secnidazole	1.04417
Selegiline hydrochloride	0.741181
Serotonin hydrochloride	0.942309
Sertaconazole nitrate	-9.91939
Sertindole	-70.0452
Sertraline	-17.5654
Sibutramine hydrochloride	0.400698
Sildenafil	-1.11822
Silodosin	0.719642
Simvastatin	-3.80635
Sisomicin sulfate	0.377685
Sotalol hydrochloride	1.02845
Spaglumic acid	0.176752
Sparfloxacin	-0.217469
Spectinomycin dihydrochloride	-0.426355
Spiperone	-1.07405
Spiramycin	0.830322
Spironolactone	-1.50681
Stanozolol	-0.902521
Stavudine	0.29686
Streptomycin sulfate	1.13644
Streptozotocin	0.45104
Succinylsulfathiazole	1.24794
Sulbactam	0.337635
Sulconazole nitrate	-8.61534
Sulfabenzamide	0.574388
Sulfacetamide sodic hydrate	-2.19283
Sulfachloropyridazine	-0.796228
Sulfadiazine	-0.277035
Sulfadimethoxine	0.158285
Sulfadoxine	0.17794
Sulfaguanidine	0.546802
Sulfamerazine	-0.483036
Sulfameter	0.152686
Sulfamethazine sodium salt	0.458184
Sulfamethizole	1.04999
Sulfamethoxazole	0.316192
Sulfamethoxypyridazine	-0.474793
Sulfamonomethoxine	0.237823
Sulfanilamide	0.287955
Sulfaphenazole	-0.113339
Sulfapyridine	-0.10543
Sulfaquinoxaline sodium salt	0.172595
Sulfasalazine	0.376988
Sulfathiazole	0.32066
Sulfinpyrazone	1.1833
Sulfisoxazole	-0.0810548
Sulindac	1.10197
Sulmazole	0.156291
Suloctidil	-70.1237
Sulpiride	1.2753
Sumatriptan succinate	0.0607425
Suprofen	0.131326
Suxibuzone	-0.76241
Tacrine hydrochloride	-0.189463
Tamoxifen citrate	-10.9308
Tazobactam	0.682235
Tegafur	0.738293
Tegaserod maleate	-72.525
Telenzepine dihydrochloride	0.364249
Telmisartan	0.641948
Temozolomide	-0.961207
Tenatoprazole	-0.883688
Tenoxicam	0.501764
Terazosin hydrochloride	-0.318729
Terbinafine	0.434291
Terbutaline hemisulfate	0.744749
Terconazole	-0.63434
Terfenadine	-82.941
Testosterone propionate	-2.23594
Tetracaïne hydrochloride	0.715615
Tetracycline hydrochloride	0.792126
Tetraethylenepentamine pentahydrochloride	0.634131
Tetrahydrozoline hydrochloride	0.571124
Tetramisole hydrochloride	1.05497
Thalidomide	-0.684576
Theobromine	-0.663018
Theophylline monohydrate	0.651847
Thiamine hydrochloride	0.882768
Thiamphenicol	1.21425
Thiethylperazine dimalate	-87.9641
Thiocolchicoside	0.209699
Thioguanosine	-7.7729
Thioperamide maleate	-0.41472
Thioproperazine dimesylate	-3.55462
Thioridazine hydrochloride	-75.8089
Thiorphan	1.12427
Thiostrepton	-42.3626
THIP Hydrochloride	-0.207295
Thonzonium bromide	-79.456
Thyroxine (L)	-0.083861
Tiabendazole	-0.0280978
Tiapride hydrochloride	0.286482
Tiaprofenic acid	-0.305117
Tibolone	-2.0811
Ticarcillin sodium	-0.0281112
Ticlopidine hydrochloride	-0.423249
Tigecycline	0.194237
Timolol maleate salt	0.610165
Tinidazole	0.44396
Tioconazole	-7.1839
Tiratricol, 3,3',5-triiodothyroacetic acid	-0.0171461
Tizanidine hydrochloride	-0.43489
Tobramycin	0.620029
Tocainide hydrochloride	0.342525
Todralazine hydrochloride	1.66823
Tolazamide	0.583469
Tolazoline hydrochloride	0.488742
Tolbutamide	0.227929
Tolcapone	-0.452837
Tolfenamic acid	0.270405
Tolmetin sodium salt dihydrate	0.15081
Tolnaftate	-0.268964
Tolterodine tartrate	-0.616486
Toltrazuril	-0.222856
Tomoxetine hydrochloride	1.19642
Topiramate	1.04189
Topotecan	-18.9574
Toremifene	-5.43047
Torsemide	0.417026
Tosufloxacin hydrochloride	-0.728129
Tracazolate hydrochloride	-0.317458
Tramadol hydrochloride	0.563322
Tranexamic acid	0.569378
Tranilast	-0.394119
Tranylcypromine hydrochloride	0.120684
Trapidil	0.911416
Trazodone hydrochloride	0.154227
Tremorine dihydrochloride	0.42787
Triamcinolone	0.85197
Triamterene	-0.682465
Tribenoside	-0.641486
Trichlormethiazide	0.283456
Triclabendazole	1.10661
Triclosan	-0.293292
Tridihexethyl chloride	0.777549
Trifluoperazine dihydrochloride	-13.8494
Triflupromazine hydrochloride	-16.0402
Trifluridine	-12.379
Triflusal	0.670388
Trihexyphenidyl-D,L Hydrochloride	-0.331774
Trimebutine	-1.24535
Trimeprazine tartrate	-0.689396
Trimetazidine dihydrochloride	-0.0545069
Trimethadione	0.350373
Trimethobenzamide hydrochloride	-1.94322
Trimethoprim	0.209286
Trimetozine	0.114868
Trimipramine maleate salt	-1.48749
Trioxsalen	-0.465621
Tripelennamine hydrochloride	0.812865
Triprolidine hydrochloride	0.0401364
Troglitazone	0.625423
Troleandomycin	0.596843
Trolox	0.1985
Tropicamide	0.593127
Tropisetron hydrochloride	0.40679
Troxipide	0.480337
Tulobuterol	1.24656
Tylosin	-0.0418494
Tyloxapol	0.226213
Ubenimex	0.472362
Urapidil hydrochloride	0.554982
Urosiol	2.34467
Valacyclovir hydrochloride	0.403759
Valdecoxib	-0.624236
Valproic acid	-0.42166
Valsartan	-0.103459
Vancomycin hydrochloride	0.159118
Vardenafil	-0.249161
Vatalanib	-0.280812
Vecuronium bromide	0.00916448
Venlafaxine	1.55056
Verapamil hydrochloride	-0.0793279
Verteporfin	-2.29879
Vidarabine	-1.52496
Vigabatrin hydrochloride	-0.0474074
Viloxazine hydrochloride	-0.0741474
Vincamine	-0.0590177
Vinpocetine	0.785594
Viomycin sulfate	0.314057
Voriconazole	0.394622
Vorinostat	-24.6937
Warfarin	-0.14633
Xamoterol hemifumarate	0.510974
Xylazine	0.501606
Xylometazoline hydrochloride	0.727467
Yohimbine hydrochloride	0.549306
Zafirlukast	0.328537
Zalcitabine	0.954356
Zaleplon	0.551434
Zaprinast	0.115726
Zardaverine	-0.00501767
Zidovudine, AZT	-0.305956
Zileuton	0.58429
Zimelidine dihydrochloride monohydrate	0.0606575
Ziprasidone Hydrochloride	-13.746
Zoledronic acid hydrate	1.08478
Zolmitriptan	-0.0719094
Zomepirac sodium salt	0.702034
Zonisamide	-0.374696
Zopiclone	0.25046
Zotepine	-2.95224
Zoxazolamine	0.287977
Zuclopenthixol dihydrochloride	-11.2392

## Sheet: Prestwick 72h
Perturbator	Median of replicates R-Zscore
(-) -Levobunolol hydrochloride	0.633188
(-)-Emtricitabine	-0.0238996
(-)-Eseroline fumarate salt	-36.8104
(-)-Isoproterenol hydrochloride	0.215596
(-)-MK 801 hydrogen maleate	0.220858
(+) -Levobunolol hydrochloride	0
(+)-Isoproterenol (+)-bitartrate salt	0.104835
(+,-)-Octopamine hydrochloride	0.423156
(+,-)-Synephrine	1.07623
(R) -Naproxen sodium salt	1.25416
(R)-(+)-Atenolol	0.382357
(R)-Propranolol hydrochloride	-0.00716801
(S)-(-)-Atenolol	0.0280428
(S)-(-)-Cycloserine	-0.113689
(S)-propranolol hydrochloride	-0.415107
2-Aminobenzenesulfonamide	0.0457967
2-Chloropyrazine	0.505298
3-alpha-Hydroxy-5-beta-androstan-17-one	0.581519
4-Aminosalicylic acid	-21.804
5-Fluorouracil	-6.93586
6-Furfurylaminopurine	-0.563148
Abacavir Sulfate	0.0189055
Acamprosate calcium	0.475478
Acarbose	0.813761
Acebutolol hydrochloride	1.52212
Aceclidine Hydrochloride	0.547818
Aceclofenac	0.356201
Acefylline	0.11345
Acemetacin	0.108318
Acenocoumarol	-0.822724
Acetaminophen	0.518124
Acetazolamide	0.485077
Acetohexamide	0.123216
Acetopromazine maleate salt	-1.07597
Acetylcysteine	0.824382
Acetylsalicylic Acid	-0.952196
Acetylsalicylsalicylic acid	0.476832
Acipimox	-0.132497
Acitretin	0.992084
Acyclovir	0.090265
Adamantamine fumarate	0.647539
Adenosine 5'-monophosphate monohydrate	-0.253565
Adiphenine hydrochloride	1.04313
Adrenosterone	0.223888
Albendazole	-26.0436
Alclometasone dipropionate	-1.00671
Alcuronium chloride	0.228102
Alendronate sodium	0.73135
Alexidine dihydrochloride	-16.0378
Alfacalcidol	-2.06412
Alfadolone acetate	-0.000231874
Alfaxalone	0.123105
Alfuzosin hydrochloride	0.674121
Alizapride HCl	-0.233538
Allantoin	-0.00650943
Allopurinol	0.53956
Alprenolol hydrochloride	1.22133
Alprostadil	0.00548333
Althiazide	0.257822
Altretamine	0.0273657
Alverine citrate salt	-0.449002
Ambrisentan	0.521046
Ambroxol hydrochloride	0.975029
Amcinonide	0.260055
Amethopterin (R,S)	-10.1469
Amfepramone hydrochloride	0.556383
Amidopyrine	0.299015
Amifostine	0.253151
Amikacin hydrate	0.584441
Amiloride hydrochloride dihydrate	-0.0913939
Aminocaproic acid	-0.641185
Aminohippuric acid	0.398398
Aminophylline	0.185739
Aminopurine, 6-benzyl	0.672521
Amiodarone hydrochloride	-21.1133
Amiprilose hydrochloride	1.2832
Amisulpride	0.156316
Amitryptiline hydrochloride	-1.91188
Amlodipine	-2.43451
Amodiaquin dihydrochloride dihydrate	-20.4776
Amoxapine	-3.24389
Amoxicillin	0.000312209
Amphotericin B	1.20137
Ampicillin trihydrate	-0.389358
Amprolium hydrochloride	0.544879
Ampyrone	0.2087
Amrinone	-0.9628
Amyleine hydrochloride	0.107335
Anastrozole	0.243097
Androsterone	-0.416834
Anethole-trithione	0.587807
Aniracetam	0.609711
Antazoline hydrochloride	0.264167
Anthralin	0.805582
Antimycin A	-10.5134
Antipyrine	-0.109888
Antipyrine, 4-hydroxy	0.905482
Apramycin	0.974727
Aprepitant	-12.25
Arbutin	0.597373
Argatroban	1.43106
Aripiprazole	-8.0955
Artemisinin	-0.1326
Articaine hydrochloride	-0.650094
Ascorbic acid	0.210481
Asenapine maleate	-0.735367
Astemizole	-29.932
Atorvastatin	-28.3867
Atovaquone	-0.823048
Atractyloside potassium salt	0.0483441
Atracurium besylate	-1.32254
Atropine sulfate monohydrate	0.486475
Auranofin	-19.5203
Avermectin B1a	-21.0309
Azacyclonol	0.281046
Azacytidine-5	-6.93311
Azaguanine-8	-14.6367
Azaperone	0.0419788
Azapropazone	-0.123475
Azathioprine	-0.728366
Azelastine HCl	-4.64066
Azithromycin	-20.4118
Azlocillin sodium salt	0.514366
Aztreonam	-0.477628
Bacampicillin hydrochloride	-1.03757
Bacitracin	-0.253595
Baclofen (R,S)	0.81195
Balsalazide Sodium	-0.33445
Bambuterol hydrochloride	-0.994315
Beclomethasone dipropionate	-0.196785
Bemegride	0.545741
Benazepril HCl	0.646484
Bendroflumethiazide	0.841674
Benfluorex hydrochloride	-0.00736014
Benfotiamine	-0.102255
Benoxinate hydrochloride	0.394425
Benperidol	-0.24939
Benserazide hydrochloride	-26.2975
Benzamil hydrochloride	-1.25063
Benzathine benzylpenicillin	0.455217
Benzbromarone	-0.143811
Benzethonium chloride	-24.7221
Benzocaine	0.835218
Benzonatate	0.390358
Benzthiazide	0.105336
Benztropine mesylate	-0.781244
Benzydamine hydrochloride	-0.968182
Benzylpenicillin sodium	0.850881
Bephenium hydroxynaphthoate	0.387652
Bepridil hydrochloride	-13.9796
Beta-Escin	-23.4284
Betahistine mesylate	0.137785
Betamethasone	0.00650943
Betaxolol hydrochloride	1.34306
Betazole hydrochloride	0.00068948
Bethanechol chloride	0.798761
Bezafibrate	0.209191
Bicalutamide	-0.410345
Bifonazole	-0.36501
Biotin	0.00918313
Biperiden hydrochloride	0.33353
Bisacodyl	0.225138
Bisoprolol fumarate	0.340562
Bosentan	-16.8551
Bretylium tosylate	0.211781
Brinzolamide	-0.0327614
Bromhexine hydrochloride	0.797684
Bromocryptine mesylate	-2.08593
Bromopride	0.466581
Bromperidol	-1.73468
Brompheniramine maleate	0.897273
Bucladesine sodium salt	0.14704
Budesonide	0.157801
Bufexamac	-8.30047
Buflomedil hydrochloride	0.708592
Bumetanide	0.463531
Bupivacaine hydrochloride	1.34937
Bupropion hydrochloride	-0.346777
Buspirone hydrochloride	1.02225
Busulfan	-0.380187
Butacaine	0.000231874
Butalbital	0.42055
Butamben	0.0966173
Butenafine Hydrochloride	0.730502
Butoconazole nitrate	-4.76665
Butylparaben	-0.288623
Butylscopolammonium (n-) bromide	-0.0822612
Caffeine	1.07987
Calcipotriene	-0.51159
Camptothecine (S,+)	-24.4353
Camylofine chlorhydrate	-0.029656
Candesartan	0.525679
Canrenoic acid potassium salt	0.474613
Canrenone	0.0155369
Captopril	-0.134259
Carbachol	-1.01383
Carbadox	-0.361675
Carbamazepine	0.22575
Carbarsone	0.1454
Carbenoxolone disodium salt	0.387099
Carbetapentane citrate	0.100801
Carbidopa	-20.9622
Carbimazole	-0.42839
Carbinoxamine maleate salt	0.349398
Carisoprodol	0.213181
Carprofen	0.429226
Carteolol hydrochloride	0.723792
Carvedilol	-7.89111
Catharanthine	-9.72381e-05
Cefaclor hydrate	0.470148
Cefadroxil	0.392706
Cefazolin sodium salt	0.305202
Cefdinir	0.883796
Cefepime hydrochloride	-0.539216
Cefixime	0.545132
Cefmetazole sodium salt	0.331602
Cefoperazone dihydrate	-0.198483
Ceforanide	0.806406
Cefotaxime sodium salt	-1.1189
Cefotetan	-0.329089
Cefotiam hydrochloride	-0.480988
Cefoxitin sodium salt	-0.84081
Cefsulodin sodium salt	-0.786874
Ceftazidime pentahydrate	0.182574
Cefuroxime sodium salt	-1.70967
Celecoxib	-0.195126
Celiprolol HCl	0.0915793
Cephalosporanic acid, 7-amino	0.109914
Cephalothin sodium salt	-0.000479593
Cetirizine dihydrochloride	-0.0271892
Chenodiol	0.474126
Chicago sky blue 6B	-2.11506
Chlorambucil	-15.9185
Chloramphenicol	-0.536477
Chlorcyclizine hydrochloride	-1.09522
Chlorhexidine	-33.6777
Chlormadinone Acetate	-0.339144
Chlormezanone	0.594166
Chloropyramine hydrochloride	-0.303294
Chloroquine diphosphate	0.0866966
Chlorothiazide	0.252085
Chlorotrianisene	0.237716
Chloroxine	-30.7223
Chlorpheniramine maleate	0.031943
Chlorphensin carbamate	0.468385
Chlorpromazine hydrochloride	-23.1853
Chlorpropamide	-0.188252
Chlorprothixene hydrochloride	-14.494
Chlortetracycline hydrochloride	0.791346
Chlorthalidone	-0.431309
Chlorzoxazone	-0.215052
Ciclopirox ethanolamine	-26.0443
Cilnidipine	-8.78646
Cilostazol	0.404163
Cimetidine	0.725941
Cinnarizine	1.44865
Cinoxacin	0.25566
Ciprofibrate	0.241166
Ciprofloxacin hydrochloride monohydrate	0.172526
Cisapride	-2.14682
Citalopram Hydrobromide	0.0263676
Cladribine	-28.4925
Clarithromycin	0.113684
Clavulanate potassium salt	0.0896677
Clebopride maleate	-0.734023
Clemastine fumarate	-17.0879
Clemizole hydrochloride	0.889384
Clenbuterol hydrochloride	0.0989153
Clidinium bromide	-0.107938
Clinafloxacin	0.131596
Clindamycin hydrochloride	0.435698
Clioquinol	-28.1767
Clobetasol propionate	0.38807
Clobutinol hydrochloride	0.208142
Clocortolone pivalate	-4.39463
Clodronate	0.596138
Clofazimine	-0.735131
Clofibrate	-0.231947
Clofibric acid	0.990209
Clofilium tosylate	-30.7028
Clomiphene citrate (Z,E)	-25.1094
Clomipramine hydrochloride	-9.62851
Clonidine hydrochloride	0.206882
Clonixin Lysinate	-16.2337
Clopamide	0.00546113
Cloperastine hydrochloride	-3.64623
Clorgyline hydrochloride	-0.047902
Clorsulon	-0.0471855
Closantel	-1.82044
Clotrimazole	-17.5959
Cloxacillin sodium salt	0.0749251
Clozapine	0.366946
Colchicine	-29.9501
Colistin sulfate	0.425302
Corticosterone	0.317373
Cortisol acetate	0.200682
Cortisone	-0.19985
Cromolyn disodium salt	0.155883
Crotamiton	1.15188
Cyanocobalamin	0.45914
Cyclizine hydrochloride	0.815481
Cyclobenzaprine hydrochloride	-2.12219
Cycloheximide	-18.6941
Cyclopenthiazide	0.0797142
Cyclopentolate hydrochloride	1.04445
Cyclophosphamide	0.20095
Cyclosporin A	-13.9449
Cyproheptadine hydrochloride	-3.17212
Cyproterone acetate	-0.765119
Cytarabine	-24.8927
Dacarbazine	-0.000710046
Danazol	-2.64621
Dantrolene sodium salt	0.698974
Dapsone	-0.678453
Darifenacin hydrobromide	0.00203099
Daunorubicin hydrochloride	-31.7264
D-cycloserine	0.448359
Debrisoquin sulfate	0.54747
Decamethonium bromide	0.0758735
Deferoxamine mesylate	-16.3627
Deflazacort	-0.516884
Dehydrocholic acid	-0.318909
Dehydroisoandosterone 3-acetate	0.466941
Demecarium bromide	-3.27727
Demeclocycline hydrochloride	0.309472
Denatonium benzoate	-0.41279
Deoxycorticosterone	-0.841342
Deptropine citrate	-17.9861
Dequalinium dichloride	-25.9075
Desipramine hydrochloride	-1.10943
Desloratadine	-2.47009
Dexamethasone acetate	0.195426
Dexfenfluramine hydrochloride	1.30419
Dextromethorphan hydrobromide monohydrate	0.324239
Diacerein	0.271326
Diazoxide	0.0990704
Dibenzepine hydrochloride	0.567059
Dibucaine	-1.60505
Dichlorphenamide	0.214868
Diclazuril	0.166367
Diclofenac sodium	-0.205618
Dicloxacillin sodium salt hydrate	0.5185
Dicumarol	0.897166
Dicyclomine hydrochloride	0.675735
Didanosine	0.819541
Dienestrol	-2.53111
Diethylcarbamazine citrate	-0.208379
Diethylstilbestrol	-18.6627
Diflorasone Diacetate	0.105724
Diflunisal	0.0808734
Digitoxigenin	-21.1234
Digoxigenin	-22.0313
Digoxin	-25.1958
Dihydroergotamine tartrate	-0.89079
Dihydrostreptomycin sulfate	1.58849
Dilazep dihydrochloride	-1.77199
Diloxanide furoate	0.345504
Diltiazem hydrochloride	0.28214
Dimaprit dihydrochloride	0.540317
Dimenhydrinate	-0.132984
Dimethadione	-0.0129321
Dimethisoquin hydrochloride	0.33309
Dinoprost trometamol	-0.187664
Diosmin	-0.0851883
Dioxybenzone	-0.223819
Diperodon hydrochloride	-0.229013
Diphemanil methylsulfate	0.702176
Diphenhydramine hydrochloride	0.397574
Diphenidol hydrochloride	0.346694
Diphenylpyraline hydrochloride	0.0212
Dipivefrin hydrochloride	0.549597
Diprophylline	-0.0282689
Dipyridamole	0.311903
Dipyrone	0.894488
Dirithromycin	0.573813
Disopyramide	-0.662202
Disulfiram	-31.5193
Dizocilpine maleate	-0.180902
DO 897/99	-3.55159
Dobutamine hydrochloride	-0.335789
Docetaxel	-19.6833
Dolasetron mesilate	0.272876
Domperidone	-0.0741996
Dopamine hydrochloride	0.27863
Dorzolamide hydrochloride	0.347289
Dosulepin hydrochloride	-7.53412
Doxazosin mesylate	-2.88404
Doxepin hydrochloride	-1.9606
Doxofylline	0.5401
Doxorubicin hydrochloride	-27.0396
Doxycycline hydrochloride	-0.460882
Doxylamine succinate	0.257766
Drofenine hydrochloride	-0.350233
Droperidol	0.939046
Dropropizine (R,S)	0.594441
Dyclonine hydrochloride	0.0687201
Dydrogesterone	-0.11261
Ebselen	-3.17338
Eburnamonine (-)	-25.0906
Econazole nitrate	-9.48985
Edrophonium chloride	-0.583275
Efavirenz	0.445818
Emedastine	-0.24845
Enalapril maleate	0.761279
Enilconazole	-1.9755
Enoxacin	0.642025
Entacapone	0.578
Epiandrosterone	0.825524
Epirizole	0.117983
Epitiostanol	-0.103475
Equilin	0.511588
Erlotinib	0.327555
Erythromycin	1.14522
Escitalopram	0.491888
Eserine hemisulfate salt	0.599422
Esmolol hydrochloride	0.804028
Estradiol Valerate	0.192811
Estradiol-17 beta	-5.32407
Estriol	1.26123
Estrone	0.524492
Estropipate	-0.0634462
Etanidazole	0.335669
Ethacrynic acid	-0.312567
Ethambutol dihydrochloride	-0.138249
Ethamivan	0.496956
Ethamsylate	-0.737573
Ethaverine hydrochloride	-7.48143
Ethinylestradiol	-19.269
Ethionamide	0.76033
Ethisterone	-1.09707
Ethopropazine hydrochloride	-0.885545
Ethosuximide	-0.634245
Ethotoin	1.86047
Ethoxyquin	0.252296
Ethynodiol diacetate	-2.05872
Ethynylestradiol 3-methyl ether	0.304401
Etidronic acid, disodium salt	0.0862231
Etifenin	-0.154957
Etilefrine hydrochloride	1.04662
Etodolac	0.899859
Etofenamate	-1.19711
Etofylline	0.0908618
Etomidate	-2.95219
Etoposide	-28.3347
Etoricoxib	1.36829
Etretinate	-4.62864
Eucatropine hydrochloride	0.870746
Exemestane	-2.77858
Fadrozole hydrochloride	1.03384
Famciclovir	0.501499
Famotidine	0.0746281
Famprofazone	-0.129678
Felbinac	-0.0508298
Felodipine	0.241024
Fenbendazole	-25.5572
Fenbufen	0.204801
Fendiline hydrochloride	-37.8425
Fenipentol	0.177769
Fenofibrate	0.00191626
Fenoprofen calcium salt dihydrate	0.709923
Fenoterol hydrobromide	-0.0133401
Fenspiride hydrochloride	-0.0391005
Fentiazac	1.61351
Fexofenadine HCl	-19.9461
Finasteride	0.172811
Fipexide hydrochloride	-5.14167
Flavoxate hydrochloride	-0.111376
Flecainide acetate	-0.476229
Fleroxacin	0.448975
Florfenicol	0.112416
Floxuridine	-16.318
Flubendazol	-25.735
Flucloxacillin sodium	-0.651161
Fluconazole	0.548875
Flucytosine	0.819575
Fludarabine	-5.25925
Fludrocortisone acetate	-0.288367
Flufenamic acid	-0.00643839
Flumequine	0.167735
Flumethasone	-0.384145
Flunarizine dihydrochloride	-2.93262
Flunisolide	0.253678
Flunixin meglumine	-0.0645747
Fluocinolone acetonide	0.568516
Fluocinonide	1.52008
Fluorometholone	0.114216
Fluoxetine hydrochloride	-13.3363
Fluphenazine dihydrochloride	-34.552
Flurandrenolide	0.11489
Flurbiprofen	0.692427
Fluspirilen	-25.7279
Flutamide	0.369918
Fluticasone propionate	-1.53054
Fluvastatin sodium salt	-34.8487
Fluvoxamine maleate	-1.03321
Folic acid	-0.0507785
Folinic acid calcium salt	0.000853946
Fomepizole	0.197794
Formestane	-0.450795
Formoterol fumarate	0.654403
Fosfosal	0.412642
Fosinopril	1.06977
Fulvestrant	0.494885
Furaltadone hydrochloride	-0.369911
Furazolidone	-1.91461
Furosemide	-0.110005
Fursultiamine Hydrochloride	0.671311
Fusidic acid sodium salt	0.0830156
Gabapentin	1.18348
Gabazine bromide	0.517365
Gabexate mesilate	0.842694
Galanthamine hydrobromide	0.825493
Gallamine triethiodide	0.797066
Ganciclovir	-0.276262
Gatifloxacin	0.209131
GBR 12909 dihydrochloride	-18.9104
Gefitinib	-6.22308
Gemcitabine	-26.1733
Gemfibrozil	-0.0932432
Gentamicine sulfate	1.08958
Gestrinone	-1.74199
Glafenine hydrochloride	-0.414227
Glibenclamide	-1.23179
Gliclazide	0.729301
Glimepiride	0.0271454
Glipizide	-0.175004
Gliquidone	-1.02715
Glutethimide, para-amino	0.251845
Glycopyrrolate	0.384871
Granisetron	0.497015
Griseofulvin	-17.3322
Guaiacol	0.645798
Guaifenesin	1.09383
Guanabenz acetate	0.000948172
Guanadrel sulfate	0.300637
Guanethidine sulfate	1.00086
Guanfacine hydrochloride	-0.861437
Halcinonide	0.149991
Halofantrine hydrochloride	-2.22507
Haloperidol	-1.66425
Haloprogin	-32.025
Hemicholinium bromide	0.604233
Heptaminol hydrochloride	0.00038571
Hesperidin	0.00434131
Hexachlorophene	-18.7467
Hexamethonium dibromide dihydrate	0.544298
Hexestrol	-0.465498
Hexetidine	-25.994
Hexylcaine hydrochloride	-0.0500676
Homatropine hydrobromide (R,S)	0.856853
Homochlorcyclizine dihydrochloride	-12.0084
Homosalate	0.25033
Hycanthone	-30.3677
Hydralazine hydrochloride	0.372262
Hydrochlorothiazide	-0.130136
Hydrocortisone base	0.00787636
Hydroflumethiazide	-0.0735061
Hydroxychloroquine sulfate	0.567361
Hydroxytacrine maleate (R,S)	0.655645
Hydroxyzine dihydrochloride	0.373535
Hymecromone	-0.512811
Hyoscyamine (L)	0.694315
Ibandronate sodium	0.139277
Ibudilast	-19.0542
Ibutilide fumarate	0.681042
Idazoxan hydrochloride	-0.837702
Idebenone	-8.50482
Idoxuridine	-3.13325
Ifenprodil tartrate	1.14163
Ifosfamide	0.199839
Imatinib	-2.33391
Imidurea	0.162135
Imipenem	0.350462
Imipramine hydrochloride	-0.36405
Imiquimod	0.40134
Indapamide	0.368206
Indatraline hydrochloride	-28.2585
Indomethacin	-0.367814
Indoprofen	1.24476
Iobenguane sulfate	0.940087
Iocetamic acid	0.348608
Iodipamide	-0.0372267
Iodixanol	0.185697
Iohexol	-0.301389
Iopamidol	1.44831
Iopanoic acid	0.769517
Iopromide	0.789844
Ioversol	-0.031518
Ioxaglic acid	0.611233
Iproniazide phosphate	0.446844
Ipsapirone	0.371565
Irinotecan hydrochloride trihydrate	-29.6957
Irsogladine maleate	0.567763
Isocarboxazid	0.557058
Isoconazole	-2.91362
Isoetharine mesylate salt	0.556361
Isoflupredone acetate	0.882339
Isometheptene mucate	-18.0314
Isoniazid	0.460464
Isopropamide iodide	-0.261921
Isopyrin hydrochloride	1.55834
Isoquinoline, 6,7-dimethoxy-1-methyl-1,2,3,4-tetrahydro, hydrochloride	-0.225063
Isosorbide dinitrate	-0.536104
Isosorbide mononitrate	0.96393
Isotretinoin	-1.82617
Isoxicam	-0.207197
Isoxsuprine hydrochloride	0.863668
Isradipine	-5.58973
Itopride	0.734578
Itraconazole	-6.22473
Ivermectin	-32.4037
Josamycin	0.781071
Kanamycin A sulfate	0.877935
Ketanserin tartrate hydrate	1.57356
Ketoconazole	-4.12817
Ketoprofen	0.146779
Ketorolac tromethamine	0.0193348
Ketotifen fumarate	-0.808223
Khellin	-0.0863073
L(-)-vesamicol hydrochloride	-0.123147
Labetalol hydrochloride	0.762039
Lacidipine	-9.27332
Lamivudine	0.155473
Lamotrigine	0.0809562
Lanatoside C	-21.4223
Lansoprazole	0.306813
Leflunomide	-0.302663
Letrozole	-11.0454
Levalbuterol hydrochloride	0.11917
Levamisole hydrochloride	0.653336
Levetiracetam	0.32267
Levocabastine hydrochloride	0.168668
Levodopa	-0.148743
Levonordefrin	0.223774
Levopropoxyphene napsylate	-0.071843
Lidocaïne hydrochloride	-0.294489
Lidoflazine	-6.08882
Lincomycin hydrochloride	0.927163
Linezolid	0.521747
Liothyronine	0.64058
Liranaftate	-0.3346
Lisinopril	0.519448
Lithocholic acid	-0.849933
Lofexidine	-0.18281
Lomefloxacin hydrochloride	1.04727
Loperamide hydrochloride	-17.8437
Loracarbef	0.0188889
Loratadine	-3.73151
Lorglumide sodium salt	1.38236
Losartan	-0.258648
Lovastatin	-31.4302
Loxapine succinate	0.042413
Luteolin	-14.2157
Lymecycline	-0.0751745
Lynestrenol	-2.08298
Mafenide hydrochloride	0.607393
Maprotiline hydrochloride	-9.25789
Mebendazole	-23.1816
Mebeverine hydrochloride	1.53071
Mebhydroline 1,5-naphtalenedisulfonate	0.935278
Mecamylamine hydrochloride	-0.80559
Meclocycline sulfosalicylate	0.000899707
Meclofenamic acid sodium salt monohydrate	-0.0887407
Meclofenoxate hydrochloride	0.848185
Meclozine dihydrochloride	-0.00787636
Medrysone	-0.534424
Mefenamic acid	0.495665
Mefexamide hydrochloride	0.33869
Mefloquine hydrochloride	-31.9794
Megestrol acetate	-1.12881
Meglumine	-0.117118
Melatonin	0.166842
Melengestrol Acetate	-1.88916
Meloxicam	-0.408301
Memantine Hydrochloride	-1.02342
Mepenzolate bromide	-0.0548075
Mephenesin	0.284191
Mephentermine hemisulfate	0.422699
Mephenytoin	0.860624
Mepivacaine hydrochloride	0.685326
Meprylcaine hydrochloride	0.411658
Meptazinol hydrochloride	-0.359556
Merbromin	-1.37434
Mercaptopurine	-2.78276
Meropenem	0.630412
Mesalamine	0.628758
Mesna	0.018195
Mesoridazine besylate	-0.534728
Metaproterenol sulfate, orciprenaline sulfate	0.124044
Metaraminol bitartrate	0.188756
Metergoline	-14.9033
Metformin hydrochloride	-0.220631
Methacholine chloride	0.159157
Methacycline hydrochloride	-0.75
Methantheline bromide	0.665251
Methapyrilene hydrochloride	0.19438
Methazolamide	0.219204
Methenamine	0.296343
Methiazole	-25.5942
Methimazole	0.718216
Methiothepin maleate	-23.7283
Methocarbamol	-0.247983
Methotrexate	-8.48167
Methotrimeprazine maleat salt	-3.68265
Methoxamine hydrochloride	0.0394376
Methyl benzethonium chloride	-20.5962
Methylatropine nitrate	0.181705
Methyldopa (L,-)	1.27757
Methyldopate hydrochloride	-0.0165494
Methylergometrine maleate	0.762555
Methylhydantoin-5-(D)	0.857638
Methylhydantoin-5-(L)	-0.000625241
Methylprednisolone, 6-alpha	0.353934
Meticrane	0.433487
Metixene hydrochloride	-15.6288
Metoclopramide monohydrochloride	-0.0583852
Metolazone	0.318822
Metoprolol-(+,-) (+)-tartrate salt	0.196478
Metrizamide	0.155911
Metronidazole	0.00104535
Metyrapone	0.638743
Mevalonic-D, L acid lactone	0.122816
Mevastatin	-36.291
Mexiletine hydrochloride	-0.0170192
Mianserine hydrochloride	1.09904
Miconazole	-4.19273
Midodrine hydrochloride	-1.28858
Mifepristone	-0.842551
Miglitol	-0.0465779
Milrinone	0.94537
Minaprine dihydrochloride	1.4639
Minocycline hydrochloride	0.399292
Minoxidil	0.531124
Mirtazapine	0.021835
Misoprostol	-0.291317
Mitotane	-0.0102658
Mitoxantrone dihydrochloride	-32.1367
Mizolastine	0.254446
Moclobemide	0.453468
Modafinil	0.530192
Molindone hydrochloride	-0.0131533
Molsidomine	0.163459
Mometasone furoate	-3.17761
Monensin sodium salt	-23.7536
Monobenzone	-27.6373
Montelukast	0.824041
Morantel tartrate	0.857735
Moricizine hydrochloride	0.733827
Moroxidine hydrochloride	-0.0020718
Morpholinoethylamino-3-benzocyclohepta-(5,6-c)-pyridazine dihydrochloride	1.75304
Moxalactam disodium salt	-0.175335
Moxifloxacin	0.288109
Moxisylyte hydrochoride	1.01546
Moxonidine	-0.255983
N6-methyladenosine	-2.61092
Nabumetone	-0.256549
N-Acetyl-DL-homocysteine Thiolactone	-0.271762
N-Acetyl-L-leucine	0.242184
Nadide	-0.00472716
Nadifloxacin	-1.31538
Nadolol	-0.0212834
Nafcillin sodium salt monohydrate	0.471806
Nafronyl oxalate	0.425196
Naftifine hydrochloride	1.23445
Naftopidil dihydrochloride	0.587324
Nalbuphine hydrochloride	0.980484
Nalidixic acid sodium salt	0.14065
Nalmefene hydrochloride	1.20043
Naloxone hydrochloride	0.284518
Naltrexone hydrochloride dihydrate	-0.0012134
Nandrolone	0.649202
Naphazoline hydrochloride	0.502898
Naproxen	0.0131533
Nefazodone HCl	-2.69028
Nefopam hydrochloride	0.94311
Neomycin sulfate	1.44259
Neostigmine bromide	0.0580517
Niacin	-0.627996
Nialamide	0.703454
Nicardipine hydrochloride	0.00285519
Nicergoline	0.334226
Niclosamide	-26.5992
Nicorandil	-0.527121
Nicotinamide	1.17934
Nifedipine	-1.99599
Nifenazone	1.01399
Niflumic acid	0.876049
Nifuroxazide	-29.9318
Nifurtimox	-18.5487
Nilutamide	0.625684
Nilvadipine	-0.913696
Nimesulide	0.515372
Nimodipine	-0.0129354
Niridazole	0.584466
Nisoldipine	-27.6801
Nisoxetine hydrochloride	-0.498471
Nitrendipine	-0.266534
Nitrocaramiphen hydrochloride	0.786485
Nitrofural	-0.121613
Nitrofurantoin	-0.0955161
Nizatidine	-0.137916
Nocodazole	-21.6476
Nomegestrol acetate	-20.1855
Nomifensine maleate	1.02192
Norcyclobenzaprine	-5.13956
Norethindrone	-0.34047
Norethynodrel	-1.19407
Norfloxacin	1.22941
Norgestimate	-10.2671
Norgestrel-(-)-D	0.217907
Nortriptyline hydrochloride	-12.7529
Novobiocin sodium salt	0.881543
Nylidrin	0.257339
Nystatine	-0.324027
Ofloxacin	0.323657
Olanzapine	-0.179346
Olmesartan	-18.7055
Olopatadine hydrochloride	0.275888
Omeprazole	0.391737
Ondansetron Hydrochloride	0.879142
Opipramol dihydrochloride	-0.316868
Ornidazole	0.108794
Orphenadrine hydrochloride	0.959577
Oxacillin sodium	0.889444
Oxalamine citrate salt	-1.38575
Oxandrolone	0.424463
Oxantel pamoate	1.02646
Oxaprozin	0.9224
Oxcarbazepine	0.0692104
Oxethazaine	-10.7649
Oxfendazol	-19.4572
Oxibendazol	-24.8134
Oxiconazole Nitrate	-3.68673
Oxolinic acid	0.540947
Oxprenolol hydrochloride	0.668477
Oxybenzone	-0.852942
Oxybutynin chloride	-0.302403
Oxymetazoline hydrochloride	0.419519
Oxyphenbutazone	1.10506
Oxytetracycline dihydrate	0.665113
Ozagrel hydrochloride	-0.198556
Paclitaxel	-30.2111
Pancuronium bromide	0.684017
Panthenol (D)	0.19827
Papaverine hydrochloride	-7.26132
Parbendazole	-23.4309
Pargyline hydrochloride	0.346456
Paromomycin sulfate	0.147697
Paroxetine Hydrochloride	-10.2503
Parthenolide	-21.1328
Pefloxacine	0.499365
Pemirolast potassium	0.459465
Pempidine tartrate	0.210853
Penbutolol sulfate	-20.2392
Penciclovir	-0.438313
Penicillamine	-0.457991
Pentamidine isethionate	-8.68327
Pentetic acid	0.550479
Pentobarbital	0.574087
Pentolinium bitartrate	0.0673716
Pentoxifylline	0.367824
Pentylenetetrazole	-0.363258
Pepstatin A	-0.00365683
Pergolide mesylate	0.0137354
Perhexiline maleate	-26.0412
Perindopril	-21.381
Perphenazine	-31.6759
Phenacetin	0.120586
Phenazopyridine hydrochloride	0.620911
Phenelzine sulfate	0.69043
Phenethicillin potassium salt	-0.634389
Phenformin hydrochloride	-2.49362
Phenindione	0.104296
Pheniramine maleate	-0.00211261
Phenoxybenzamine hydrochloride	-0.792686
Phensuximide	0.450968
Phentermine hydrochloride	0.512101
Phentolamine hydrochloride	1.14605
Phenylbutazone	0.944371
Phenylpropanolamine hydrochloride	0.498195
Phthalylsulfathiazole	-0.274204
Picotamide monohydrate	0.213704
Picrotoxinin	0.504907
Pilocarpine nitrate	-0.0142183
Pimethixene maleate	-3.22756
Pimozide	-28.6262
Pinacidil	0.0012134
Pinaverium bromide	-27.1346
Pindolol	1.46193
Pioglitazone	0.432054
Pipemidic acid	-0.349421
Pipenzolate bromide	0.119845
Piperacetazine	-3.77334
Piperacillin sodium salt	1.39974
Piperidolate hydrochloride	0.156495
Piracetam	-0.0108961
Pirenperone	0.800693
Pirenzepine dihydrochloride	-0.00836584
Piretanide	0.088724
Piribedil hydrochloride	0.244
Pirlindole mesylate	-0.0903431
Piromidic acid	-0.137989
Piroxicam	-0.000961989
Pivampicillin	-0.172287
Pivmecillinam hydrochloride	-0.884763
Pizotifen malate	-2.48113
Podophyllotoxin	-24.6712
Practolol	0.920974
Pralidoxime chloride	0.0655386
Pramipexole	0.0440469
Pramoxine hydrochloride	0.921304
Pranlukast	0.0635694
Pranoprofen	-0.451285
Pravastatin	-0.654524
Praziquantel	1.20422
Prazosin hydrochloride	-15.019
Prednicarbate	-0.0173969
Prednisolone	0.126481
Prednisone	1.26537
Pregnenolone	-0.279342
Prenylamine lactate	-31.185
Pridinol methanesulfonate salt	-1.26362
Prilocaine hydrochloride	-0.00147093
Primaquine diphosphate	-25.0586
Primidone	0.034499
Proadifen hydrochloride	-1.24453
Probenecid	-0.337139
Probucol	1.18654
Procainamide hydrochloride	0.648684
Procaine hydrochloride	-0.0156645
Procarbazine hydrochloride	-18.46
Prochlorperazine dimaleate	-31.4563
Procyclidine hydrochloride	0.442033
Progesterone	-5.85893
Proglumide	0.220977
Proguanil hydrochloride	-1.25267
Promazine hydrochloride	-1.09003
Promethazine hydrochloride	-1.21681
Pronethalol hydrochloride	0.655976
Propafenone hydrochloride	-4.99963
Propantheline bromide	-0.000312209
Proparacaine hydrochloride	0.0174144
Propidium iodide	-2.47829
Propofol	0.48013
Propoxycaine hydrochloride	0.640196
Propylthiouracil	0.310826
Proscillaridin A	-20.9987
Prothionamide	1.35786
Protriptyline hydrochloride	-8.64238
Pyrantel tartrate	-0.188362
Pyrazinamide	0.0908832
Pyridostigmine iodide	-0.028014
Pyridoxine hydrochloride	0.17603
Pyrilamine maleate	0.302683
Pyrimethamine	-3.67541
Pyrithyldione	-0.223882
Pyrvinium pamoate	-31.1591
Quetiapine hemifumarate	0.259501
Quinacrine dihydrochloride dihydrate	-25.7902
Quinapril HCl	0.287026
Quinethazone	0.873991
Quinidine hydrochloride monohydrate	-0.0340191
Quipazine dimaleate salt	0.330087
R(-) Apomorphine hydrochloride hemihydrate	-15.7969
Rabeprazole Sodium salt	-1.01313
Racecadotril	1.5315
Racepinephrine HCl	1.04718
Raclopride	0.471565
Raloxifene hydrochloride	-22.5242
Ramipril	1.3565
Ranitidine hydrochloride	-0.348469
Ranolazine	-0.0424541
Rebamipide	0.334929
Reboxetine mesylate	-0.0618453
Remoxipride Hydrochloride	0.216413
Repaglinide	1.1266
Reserpine	-2.39118
Retinoic acid	-0.85999
Ribavirin	0.467056
Ribostamycin sulfate salt	0.47245
Rifabutin	0.134578
Rifampicin	0.795172
Rifapentine	-0.0480114
Rifaximin	1.02477
Riluzole hydrochloride	-1.44066
Rimantadine Hydrochloride	0.347848
Rimexolone	-2.30113
Risperidone	1.06306
Ritodrine hydrochloride	1.08806
Rivastigmine	-0.188945
Rofecoxib	0.159765
Rolipram	0.604434
Ronidazole	0.401149
Ropinirole HCl	0.609805
Rosiglitazone Hydrochloride	1.39569
Roxatidine Acetate HCl	0.435431
Roxithromycin	0.0852942
Rufloxacin	0.743963
S(-)Eticlopride hydrochloride	-2.19274
S-(+)-ibuprofen	0.697542
Salbutamol	0.639955
Salmeterol	-6.12178
Saquinavir mesylate	-3.49617
Sarafloxacin	0.435151
Scopolamine hydrochloride	-0.126233
Scopolamin-N-oxide hydrobromide	0.0106904
Secnidazole	0.314074
Selegiline hydrochloride	1.32167
Serotonin hydrochloride	1.47035
Sertaconazole nitrate	-16.7802
Sertindole	-29.472
Sertraline	-27.0049
Sibutramine HCl	0.543797
Sildenafil	-0.317958
Simvastatin	-26.5158
Sisomicin sulfate	0.523952
Sotalol hydrochloride	-0.108228
Spaglumic acid	-0.758015
Sparfloxacin	0.122869
Spectinomycin dihydrochloride	-0.43042
Spiperone	-1.91983
Spiramycin	-0.17001
Spironolactone	-0.245176
Stanozolol	-0.427673
Stavudine	-0.201956
Streptomycin sulfate	0.382006
Streptozotocin	-0.000699901
Succinylsulfathiazole	0.97365
Sulbactam	0.0774827
Sulconazole nitrate	-6.29137
Sulfabenzamide	0.883158
Sulfacetamide sodic hydrate	-0.456742
Sulfachloropyridazine	0.206552
Sulfadiazine	0.329035
Sulfadimethoxine	0.343286
Sulfadoxine	-11.4857
Sulfaguanidine	0.00745615
Sulfamerazine	0.746286
Sulfameter	-0.697113
Sulfamethazine sodium salt	1.14508
Sulfamethizole	0.0612668
Sulfamethoxazole	0.0746362
Sulfamethoxypyridazine	-0.1606
Sulfamonomethoxine	0.130725
Sulfanilamide	0.281087
Sulfaphenazole	0.399132
Sulfapyridine	0.118437
Sulfaquinoxaline sodium salt	0.436711
Sulfasalazine	-0.524289
Sulfathiazole	0.381415
Sulfinpyrazone	0.0340191
Sulfisoxazole	-0.065277
Sulindac	1.56849
Sulmazole	0.630581
Suloctidil	-24.8514
Sulpiride	0.680397
Sumatriptan Succinate	-0.201834
Suprofen	0.000185997
Suxibuzone	-0.972956
Tacrine hydrochloride	0.228766
Talampicillin hydrochloride	-0.273558
Tamoxifen citrate	-37.6567
Tazobactam	0.229421
Telenzepine dihydrochloride	1.00011
Telmisartan	-0.383153
Temozolomide	-0.182782
Tenatoprazole	-0.920186
Tenoxicam	-0.318551
Terazosin hydrochloride	0.305715
Terbutaline hemisulfate	1.7832
Terconazole	-1.56225
Terfenadine	-29.1877
Testosterone propionate	-1.95218
Tetracaïne hydrochloride	1.00043
Tetracycline hydrochloride	-0.194003
Tetraethylenepentamine pentahydrochloride	0.0694345
Tetrahydroxy-1,4-quinone monohydrate	0.0172056
Tetrahydrozoline hydrochloride	0.148455
Tetramisole hydrochloride	0.585857
Thalidomide	-0.0316053
Theobromine	-0.272093
Theophylline monohydrate	1.4795
Thiamine hydrochloride	0.0659543
Thiamphenicol	-0.814695
Thiethylperazine dimalate	-29.233
Thimerosal	-26.7233
Thiocolchicoside	0.533127
Thioguanosine	-14.4534
Thioperamide maleate	0.319742
Thioproperazine dimesylate	-8.08931
Thioridazine hydrochloride	-30.8086
Thiorphan	0.902806
Thiostrepton	-27.6037
THIP Hydrochloride	0.653544
Thonzonium bromide	-27.6947
Thyroxine (L)	1.28284
Tiabendazole	-0.185612
Tiapride hydrochloride	-0.272626
Tiaprofenic acid	-0.108236
Tibolone	-1.91193
Ticarcillin sodium	-3.61994
Ticlopidine hydrochloride	0.438304
Tiletamine hydrochloride	-18.0208
Timolol maleate salt	-0.0613057
Tinidazole	0.726604
Tioconazole	-14.0463
Tiratricol, 3,3',5-triiodothyroacetic acid	0.16183
Tizanidine HCl	0.472279
Tobramycin	0.255539
Tocainide hydrochloride	-6.37324
Todralazine hydrochloride	1.57409
Tolazamide	1.18986
Tolazoline hydrochloride	0.318764
Tolbutamide	0.393046
Tolfenamic acid	-0.00038571
Tolmetin sodium salt dihydrate	1.34675
Tolnaftate	0.560246
Toltrazuril	0.611113
Tomoxetine hydrochloride	0.594026
Topiramate	-0.98771
Topotecan	-29.1266
Toremifene	-15.4679
Torsemide	-0.764489
Tosufloxacin hydrochloride	-0.546723
Tracazolate hydrochloride	0.557095
Tramadol hydrochloride	0.817285
Tranexamic acid	-0.390583
Tranilast	-0.539329
Tranylcypromine hydrochloride	0.269251
Trapidil	-1.46756
Trazodone hydrochloride	0.366899
Tremorine dihydrochloride	0.19794
Triamcinolone	0.541765
Triamterene	0.219241
Tribenoside	-0.908874
Trichlorfon	-1.12426
Trichlormethiazide	-0.273863
Triclosan	-0.0700579
Tridihexethyl chloride	0.170796
Trifluoperazine dihydrochloride	-32.8012
Triflupromazine hydrochloride	-23.1011
Trifluridine	-24.8168
Triflusal	0.116674
Trihexyphenidyl-D,L Hydrochloride	0.182704
Trimeprazine tartrate	-2.10868
Trimetazidine dihydrochloride	-0.00203099
Trimethadione	-0.0018684
Trimethobenzamide hydrochloride	0.124202
Trimethoprim	-0.111094
Trimipramine maleate salt	-2.25113
Trioxsalen	-1.04473
Tripelennamine hydrochloride	0.0745804
Triprolidine hydrochloride	0.318431
Troglitazone	0.912053
Troleandomycin	-0.268608
Trolox	0.623868
Tropicamide	0.545208
Tropisetron HCl	1.0411
Tulobuterol	1.65177
Tylosin	0.15666
Tyloxapol	-3.88162
Urapidil hydrochloride	1.5324
Urosiol	-0.0195015
Valacyclovir hydrochloride	0.712559
Valproic acid	0.416525
Vancomycin hydrochloride	-0.054362
Vardenafil	0.644364
Vatalanib	-2.05521
Vecuronium bromide	0.434112
Venlafaxine	1.62034
Verapamil hydrochloride	0.894442
Verteporfin	-0.0217128
Vidarabine	-0.905914
Vigabatrin	-0.01013
Viloxazine hydrochloride	0.47618
Vincamine	-0.648989
Vinpocetine	0.331617
Viomycin sulfate	-7.40769
Voriconazole	0.210012
Vorinostat	-30.6933
Warfarin	-0.843798
Xamoterol hemifumarate	0.721394
Xylazine	0.366686
Xylometazoline hydrochloride	0.49924
Yohimbine hydrochloride	0.743697
Zafirlukast	0.028014
Zalcitabine	0.034354
Zaleplon	0.447519
Zaprinast	-0.602029
Zardaverine	0.278177
Zidovudine, AZT	-0.921562
Zileuton	0.225509
Zimelidine dihydrochloride monohydrate	-0.816464
Ziprasidone Hydrochloride	-21.7333
Zomepirac sodium salt	-0.391743
Zonisamide	0.104438
Zopiclone	-0.318811
Zotepine	-17.6394
Zoxazolamine	1.98173
Zuclopenthixol dihydrochloride	-26.1897

## Sheet: 187 Cytotoxic Coumpounds 
Perturbator	Median of replicates R-Zscore 24h	Median of replicates R-Zscore 72h	Functional and structural families
Trifluridine	-12.379	-27.5615	Antimétabolic
Avermectin B1a		-23.357	Avermectine
Ivermectin	-40.0742	-35.9872	Avermectine
Ethaverine hydrochloride		-8.30949	Benzylisoquinoline
Papaverine hydrochloride		-8.06505	Benzylisoquinoline
Albendazole	-35.6756	-28.924	Carbamate
Fenbendazole	-26.3935	-28.3837	Carbamate
Flubendazol	-34.5871	-28.5812	Carbamate
Mebendazole	-32.153	-24.3939	Carbamate
Methiazole	-36.8439	-28.4249	Carbamate
Oxfendazol	-20.8161	-19.7624	Carbamate
Oxibendazol	-33.3072	-27.5578	Carbamate
Parbendazole	-35.8138	-26.0224	Carbamate
Alexidine dihydrochloride	-29.1663	-17.8119	Cation
Clofilium tosylate	-31.4746	-34.0983	Cation
Dequalinium dichloride	-35.6905	-28.7728	Cation
Hexetidine	-73.2843	-26.1905	Cation
Methyl benzethonium chloride	-63.0289	-22.8742	Cation
Pinaverium bromide		-30.1356	Cation
Pyrvinium pamoate	-33.52	-34.605	Cation
Thonzonium bromide	-79.456	-30.7576	Cation
Chlorhexidine	-57.0325	-37.4021	Cation
Benzethonium chloride	-39.8443	-27.4564	Cation
Cilnidipine		-8.5037	Dihydropyridine
Isradipine		-5.4098	Dihydropyridine
Lacidipine		-8.84935	Dihydropyridine
Benserazide hydrochloride	-48.7718	-29.206	DOPA
Carbidopa		-16.6155	DOPA
Digitoxigenin	-16.4456	-23.4597	Enolid
Digoxigenin	-17.7872	-24.468	Enolid
Digoxin	-22.8749	-27.9824	Enolid
Lanatoside C	-19.721	-23.7918	Enolid
Proscillaridin A	-21.0199	-22.5607	Enolid
Carvedilol		-8.76447	Ethanolamine
Propafenone hydrochloride		-5.55329	Ethanolamine
Salmeterol		-5.09237	Ethanolamine
Clotrimazole	-26.7397	-14.2542	Imidazol
Sertaconazole nitrate		-17.5188	Imidazol
Tioconazole		-13.5944	Imidazol
Butoconazole nitrate	-10.6152		Imidazol
Econazole nitrate		-9.18446	Imidazol
Sulconazole nitrate		-6.08887	Imidazol
Nifuroxazide	-20.0055	-33.242	Nitrofuranne
Nifurtimox		-17.952	Nitrofuranne
5-Fluorouracil		-7.33025	Oncology/Antineoplastic
Amethopterin (R,S)		-9.82035	Oncology/Antineoplastic
Azacytidine-5	-13.8394	-7.26936	Oncology/Antineoplastic
Azaguanine-8		-16.2559	Oncology/Antineoplastic
Beta-Escin		-26.0196	Oncology/Antineoplastic
Camptothecine (S,+)	-21.5845	-27.1379	Oncology/Antineoplastic
Chlorambucil		-16.9018	Oncology/Antineoplastic
Cladribine	-16.9087	-31.6436	Oncology/Antineoplastic
Cytarabine	-17.2101	-27.6458	Oncology/Antineoplastic
Daunorubicin hydrochloride	-60.2449	-35.235	Oncology/Antineoplastic
Diethylstilbestrol	-11.0594	-18.2035	Oncology/Antineoplastic
Docetaxel	-26.8388	-21.8605	Oncology/Antineoplastic
Doxorubicin hydrochloride	-63.5652	-30.0301	Oncology/Antineoplastic
Epirubicin hydrochloride	-34.3084		Oncology/Antineoplastic
Estramustine	-18.9824		Oncology/Antineoplastic
Etoposide	-24.6761	-31.4684	Oncology/Antineoplastic
Floxuridine		-18.1231	Oncology/Antineoplastic
Fludarabine		-5.08994	Oncology/Antineoplastic
Gefitinib		-6.91202	Oncology/Antineoplastic
Gemcitabine	-15.4572	-29.068	Oncology/Antineoplastic
Idebenone		-9.44603	Oncology/Antineoplastic
Irinotecan hydrochloride trihydrate	-21.8481	-32.9798	Oncology/Antineoplastic
Methotrexate		-8.24967	Oncology/Antineoplastic
Mitoxantrone dihydrochloride	-71.8472	-35.6908	Oncology/Antineoplastic
Nocodazole	-30.308	-24.0419	Oncology/Antineoplastic
Paclitaxel	-42.4774	-33.5522	Oncology/Antineoplastic
Tamoxifen citrate	-10.9308	-41.8211	Oncology/Antineoplastic
Thioguanosine		-16.0523	Oncology/Antineoplastic
Topotecan	-18.9574	-32.3478	Oncology/Antineoplastic
Toremifene		-12.2455	Oncology/Antineoplastic
Letrozole		-10.69	Oncology/Antineoplastic
Procarbazine hydrochloride		-17.8661	Oncology/Antineoplastic
Vorinostat	-24.6937	-34.0877	Oncology/Antineoplastic
Podophyllotoxin	-34.8411	-26.2706	Podophyllotoxin
Atorvastatin		-31.5261	Statins
Fluvastatin sodium salt		-38.7026	Statins
Lovastatin		-34.9061	Statins
Mevastatin		-40.3044	Statins
Simvastatin		-29.4484	Statins
Estradiol-17 beta		-5.52943	Steroid
Norgestimate		-9.93671	Steroid
Progesterone		-5.2849	steroid
Amcinonide	-11.4782		Steroid
Clomiphene citrate (Z,E)	-10.7459	-27.8865	Stilbene
Chlorpromazine hydrochloride	-28.0262	-25.7497	Tricyclic
Clemastine fumarate		-14.0528	Tricyclic
Clomipramine hydrochloride		-10.694	Tricyclic
Deptropine citrate		-14.2484	Tricyclic
Dosulepin hydrochloride		-7.29164	Tricyclic
Fendiline hydrochloride	-11.3575	-42.0274	Tricyclic
Fexofenadine HCl		-19.3044	Tricyclic
Fluoxetine hydrochloride		-12.9072	Tricyclic
Fluphenazine dihydrochloride	-13.7421	-38.3731	Tricyclic
Fluspirilen	-13.3288	-28.4658	Tricyclic
GBR 12909 dihydrochloride		-21.0021	Tricyclic
Homochlorcyclizine dihydrochloride		-13.337	Tricyclic
Loperamide hydrochloride		-17.2696	Tricyclic
Maprotiline hydrochloride		-8.95997	Tricyclic
Methiothepin maleate	-17.0439	-26.3527	Tricyclic
Metixene hydrochloride		-14.3789	Tricyclic
Nortriptyline hydrochloride		-12.677	Tricyclic
Perhexiline maleate	-75.2818	-28.9213	Tricyclic
Perphenazine	-13.5879	-32.7437	Tricyclic
Pimozide	-14.0859	-31.792	Tricyclic
Prenylamine lactate	-19.3554	-30.7488	Tricyclic
Prochlorperazine dimaleate	-24.9573	-34.9351	Tricyclic
Protriptyline hydrochloride		-8.36426	Tricyclic
Quinacrine dihydrochloride dihydrate		-28.6426	Tricyclic
Terfenadine	-82.941	-32.4156	Tricyclic
Thiethylperazine dimalate		-32.466	Tricyclic
Thioproperazine dimesylate		-7.82898	Tricyclic
Thioridazine hydrochloride	-75.8089	-34.2158	Tricyclic
Trifluoperazine dihydrochloride		-36.4287	Tricyclic
Triflupromazine hydrochloride	-16.0402	-18.3168	Tricyclic
Zotepine		-13.9726	Tricyclic
Zuclopenthixol dihydrochloride	-11.2392	-27.7397	Tricyclic
Aripiprazole		-8.99145
Benzoxiquine	-14.4484
Bufexamac		-8.51379
Fipexide hydrochloride		-4.97614
Pentamidine isethionate		-6.84915
Thiocolchicoside	-10.4401
Tocainide hydrochloride		-5.01181
Viomycin sulfate		-7.16928
(-)-Eseroline fumarate salt	-91.3607	-40.8811
4-Aminosalicylic acid		-21.1025
Adapalene	-18.8634
Aminacrine	-21.3006
Amiodarone hydrochloride		-16.7357
Amodiaquin dihydrochloride dihydrate		-16.8818
Antimycin A		-11.6767
Aprepitant	-10.0607	-11.8558
Astemizole	-58.3434	-33.2423
Auranofin	-26.57	-21.6794
Azithromycin		-19.7551
Bepridil hydrochloride		-13.5298
Bosentan		-16.3128
Chloroxine	-47.9477	-34.12
Chlorprothixene hydrochloride		-14.0276
Ciclopirox ethanolamine	-11.2637	-28.9247
Clioquinol	-42.2764	-31.2929
Clonixin Lysinate		-15.7114
Colchicine	-37.6114	-33.2624
Cycloheximide	-17.4749	-20.7619
Cyclosporin A		-13.4962
Deferoxamine mesylate		-14.561
Disulfiram		-31.0062
Eburnamonine (-)	-37.6178	-27.8656
Ethinylestradiol	-20.9283	-21.4003
Griseofulvin		-18.6475
Haloprogin	-30.4004	-35.4231
Hexachlorophene	-22.3398	-20.8203
Hycanthone	-13.1493	-33.7262
Ibudilast		-18.4412
Indatraline hydrochloride	-41.4164	-31.3837
Isometheptene mucate		-17.4513
Luteolin		-15.7883
Mefloquine hydrochloride	-62.6958	-35.5161
Metergoline		-14.4238
Monensin sodium salt		-26.3808
Monobenzone	-11.3148	-30.6939
Niclosamide	-18.183	-29.541
Nisoldipine		-21.9587
Nomegestrol acetate		-19.5361
Olmesartan		-18.1037
Oxethazaine		-8.63983
Paroxetine Hydrochloride		-9.92043
Parthenolide	-40.0334	-23.4212
Penbutolol sulfate		-20.8901
Perindopril		-20.6932
Prazosin hydrochloride		-16.6804
Primaquine diphosphate		-27.8301
R(-) Apomorphine hydrochloride hemihydrate	-12.9691	-15.2887
Raloxifene hydrochloride	-15.0105	-24.9058
Sertindole	-70.0452	-32.7314
Sertraline	-17.5654	-29.9916
Sulfadoxine		-11.1161
Suloctidil	-70.1237	-27.5999
Tegaserod maleate	-72.525
Thimerosal		-28.7618
Thiostrepton	-42.3626	-30.6566
Tiletamine hydrochloride		-17.441
Ziprasidone Hydrochloride		-17.2288
